# Supplementary material for: DirEct versus VIdeo LaryngosCopE (DEVICE): protocol and statistical analysis plan for a randomised clinical trial in critically ill adults undergoing emergency tracheal intubation
Source: PubMed Central journal article supplement — BMJ Open. 2023 Jan 13;13(1):e068978. doi: 10.1136/bmjopen-2022-068978 (PMC9843219; doi:10.1136/bmjopen-2022-068978), 2023-01-13
Supplement: bmjopen-2022-068978.draft_revisions.pdf [file bmjopen-2022-068978.draft_revisions.pdf]

# BMJ Open

BMJ Open is committed to open peer review. As part of this commitment we make the peer review history of every article we publish publicly available.

When an article is published we post the peer reviewers' comments and the authors' responses online. We also post the versions of the paper that were used during peer review. These are the versions that the peer review comments apply to.

The versions of the paper that follow are the versions that were submitted during the peer review process. They are not the versions of record or the final published versions. They should not be cited or distributed as the published version of this manuscript.

BMJ Open is an open access journal and the full, final, typeset and author-corrected version of record of the manuscript is available on our site with no access controls, subscription charges or pay-per-view fees (<http://bmjopen.bmj.com>).

If you have any questions on BMJ Open's open peer review process please email [info.bmjopen@bmj.com](mailto:info.bmjopen@bmj.com)

# BMJ Open

## DirEct Versus VIdeo LaryngosCope (DEVICE): Protocol and statistical analysis plan for a randomized clinical trial in critically ill adults undergoing emergency tracheal intubation

|                               |                                                                                                                                                                                                                                                                                                                                                                                                                                                                                                                                                                                                                                                                                                                                                                                                                                                                                                                                                                                                                                                                                                                                                                                                                                                                                                                                                                                                                                                                                                                                                                                                                                                                                                                                                                                                                                                                                                                                                                                                                                                                                                                                                                                                                                                                                                                                            |
|-------------------------------|--------------------------------------------------------------------------------------------------------------------------------------------------------------------------------------------------------------------------------------------------------------------------------------------------------------------------------------------------------------------------------------------------------------------------------------------------------------------------------------------------------------------------------------------------------------------------------------------------------------------------------------------------------------------------------------------------------------------------------------------------------------------------------------------------------------------------------------------------------------------------------------------------------------------------------------------------------------------------------------------------------------------------------------------------------------------------------------------------------------------------------------------------------------------------------------------------------------------------------------------------------------------------------------------------------------------------------------------------------------------------------------------------------------------------------------------------------------------------------------------------------------------------------------------------------------------------------------------------------------------------------------------------------------------------------------------------------------------------------------------------------------------------------------------------------------------------------------------------------------------------------------------------------------------------------------------------------------------------------------------------------------------------------------------------------------------------------------------------------------------------------------------------------------------------------------------------------------------------------------------------------------------------------------------------------------------------------------------|
| Journal:                      | <i>BMJ Open</i>                                                                                                                                                                                                                                                                                                                                                                                                                                                                                                                                                                                                                                                                                                                                                                                                                                                                                                                                                                                                                                                                                                                                                                                                                                                                                                                                                                                                                                                                                                                                                                                                                                                                                                                                                                                                                                                                                                                                                                                                                                                                                                                                                                                                                                                                                                                            |
| Manuscript ID                 | bmjopen-2022-068978                                                                                                                                                                                                                                                                                                                                                                                                                                                                                                                                                                                                                                                                                                                                                                                                                                                                                                                                                                                                                                                                                                                                                                                                                                                                                                                                                                                                                                                                                                                                                                                                                                                                                                                                                                                                                                                                                                                                                                                                                                                                                                                                                                                                                                                                                                                        |
| Article Type:                 | Protocol                                                                                                                                                                                                                                                                                                                                                                                                                                                                                                                                                                                                                                                                                                                                                                                                                                                                                                                                                                                                                                                                                                                                                                                                                                                                                                                                                                                                                                                                                                                                                                                                                                                                                                                                                                                                                                                                                                                                                                                                                                                                                                                                                                                                                                                                                                                                   |
| Date Submitted by the Author: | 10-Oct-2022                                                                                                                                                                                                                                                                                                                                                                                                                                                                                                                                                                                                                                                                                                                                                                                                                                                                                                                                                                                                                                                                                                                                                                                                                                                                                                                                                                                                                                                                                                                                                                                                                                                                                                                                                                                                                                                                                                                                                                                                                                                                                                                                                                                                                                                                                                                                |
| Complete List of Authors:     | <p>Prekker, Matthew; Hennepin County Medical Center, Department of Emergency Medicine; Hennepin County Medical Center, Department of Medicine, Division of Pulmonary, Allergy, and Critical Care Medicine</p> <p>Driver, Brian; Hennepin County Medical Center, Department of Emergency Medicine</p> <p>Trent, Stacy; Denver Health Medical Center, Department of Emergency Medicine; University of Colorado Denver School of Medicine, Department of Emergency Medicine</p> <p>Resnick-Ault, Daniel; University of Colorado Denver School of Medicine, Department of Emergency Medicine</p> <p>Seitz, Kevin; Vanderbilt University Medical Center, Division of Pulmonary, Allergy, and Critical Care Medicine</p> <p>Russell, Derek ; University of Alabama at Birmingham, Division of Pulmonary, Allergy, &amp; Critical Care Medicine; Birmingham Veteran's Affairs Medical Center, Pulmonary Section</p> <p>Gandotra, Sheetal ; University of Alabama at Birmingham, Division of Pulmonary, Allergy, &amp; Critical Care Medicine</p> <p>Gaillard, John; Atrium Health Wake Forest Baptist, Department of Emergency Medicine; Atrium Health Wake Forest Baptist, Department of Anesthesiology, Section on Critical Care</p> <p>Gibbs, Kevin ; Wake Forest School of Medicine, Department of Medicine, Section of Pulmonary, Critical Care, Allergy and Immunology</p> <p>Latimer, Andrew; University of Washington Harborview Medical Center, Emergency Medicine</p> <p>Whitson, Micah; The University of Alabama at Birmingham, Department of Emergency Medicine; The University of Alabama at Birmingham, Department of Medicine, Division of Pulmonary, Allergy &amp; Critical Care Medicine</p> <p>Ghamande, Shekhar; Baylor Scott &amp; White Medical Center, Department of Medicine, Division of Pulmonary Disease and Critical Care Medicine</p> <p>Vonderhaar, Derek; Ochsner Health, Department of Pulmonary and Critical Care Medicine</p> <p>Walco, Jeremy; Vanderbilt University Medical Center, Department of Anesthesiology</p> <p>Hansen, Sydney; Hennepin County Medical Center, Department of Emergency Medicine; Hennepin County Medical Center, Department of Medicine, Division of Pulmonary, Allergy, and Critical Care Medicine</p> <p>Douglas, Ivor S.; Denver Health Medical Center, Division of Pulmonary</p> |

|           |                                                                                                                                                                                                                                                                                                                                                                                                                                                                                                                                                                                                                                                                                                                                                                                                                                                                                                                                                                                                                                                                                                                                                                                                                                                                                                                                                                                                                                                                                                                                                                                                                                                                                                                                                                                                                                                                                                                                                                                                                                                                                                                                                                                                                                                                                                                                                                                                                                                                                                                                                                                                                                                                                                                                                                                                                             |
|-----------|-----------------------------------------------------------------------------------------------------------------------------------------------------------------------------------------------------------------------------------------------------------------------------------------------------------------------------------------------------------------------------------------------------------------------------------------------------------------------------------------------------------------------------------------------------------------------------------------------------------------------------------------------------------------------------------------------------------------------------------------------------------------------------------------------------------------------------------------------------------------------------------------------------------------------------------------------------------------------------------------------------------------------------------------------------------------------------------------------------------------------------------------------------------------------------------------------------------------------------------------------------------------------------------------------------------------------------------------------------------------------------------------------------------------------------------------------------------------------------------------------------------------------------------------------------------------------------------------------------------------------------------------------------------------------------------------------------------------------------------------------------------------------------------------------------------------------------------------------------------------------------------------------------------------------------------------------------------------------------------------------------------------------------------------------------------------------------------------------------------------------------------------------------------------------------------------------------------------------------------------------------------------------------------------------------------------------------------------------------------------------------------------------------------------------------------------------------------------------------------------------------------------------------------------------------------------------------------------------------------------------------------------------------------------------------------------------------------------------------------------------------------------------------------------------------------------------------|
|           | <p>and Critical Care Medicine<br/> Barnes, Christopher ; University of Washington Harborview Medical Center, Department of Anesthesiology and Critical Care Medicine<br/> Krishnamoorthy, Vijay ; Duke University School of Medicine, Department of Anesthesiology<br/> Bastman, Jill; University of Colorado Denver School of Medicine, Department of Emergency Medicine<br/> Lloyd, Bradley; Vanderbilt University Medical Center, Respiratory Care<br/> Robison, Sarah; University of Alabama at Birmingham, Department of Medicine, Division of Pulmonary, Allergy, &amp; Critical Care Medicine; Birmingham Veteran's Affairs Medical Center, Pulmonary Section<br/> Palakshappa, Jessica; Wake Forest School of Medicine, Department of Medicine, Section of Pulmonary, Critical Care, Allergy and Immunology<br/> Mitchell, Steven; University of Washington Harborview Medical Center, Department of Emergency Medicine<br/> Page, David; The University of Alabama at Birmingham, Division of Pulmonary, Allergy, and Critical Care Medicine<br/> White, Heath; Baylor Scott &amp; White Medical Center, Department of Medicine, Division of Pulmonary Disease and Critical Care Medicine<br/> Espinera , Alyssa; Ochsner Health, Department of Pulmonary and Critical Care Medicine<br/> Hughes, Christopher ; Vanderbilt University Medical Center, Department of Anesthesiology<br/> Joffe, AM; University of Washington Harborview Medical Center, Department of Anesthesiology<br/> Herbert, J. Taylor; Duke University School of Medicine, Department of Anesthesiology<br/> Schauer, Steven; US Army Institute of Surgical Research<br/> Long, Brit; 59th Medical Wing<br/> Imhoff, Brant; Vanderbilt University Medical Center, Department of Biostatistics<br/> Wang, Li; Vanderbilt University School of Medicine, Department of Biostatistics<br/> Rhoads, Jillian; Vanderbilt Institute for Clinical and Translational Research<br/> Womack, Kelsey; Vanderbilt Institute for Clinical and Translational Research<br/> Janz, David; University Medical Center New Orleans, Department of Medicine, Section of Pulmonary/Critical Care Medicine and Allergy/Immunology<br/> Self, Wesley; Vanderbilt University Medical Center, Department of Emergency Medicine; Vanderbilt Institute for Clinical and Translational Research<br/> Rice, Todd; Vanderbilt University Medical Center, Division of Pulmonary, Allergy, and Critical Care Medicine<br/> Ginde, Adit; University of Colorado Denver School of Medicine, Department of Emergency Medicine<br/> Casey, Jonathan; Vanderbilt University Medical Center, Division of Pulmonary, Allergy, and Critical Care Medicine<br/> Semler, Matthew; Vanderbilt University Medical Center, Division of Pulmonary, Allergy, and Critical Care Medicine</p> |
| Keywords: | Adult intensive & critical care < INTENSIVE & CRITICAL CARE, STATISTICS & RESEARCH METHODS, ACCIDENT & EMERGENCY MEDICINE                                                                                                                                                                                                                                                                                                                                                                                                                                                                                                                                                                                                                                                                                                                                                                                                                                                                                                                                                                                                                                                                                                                                                                                                                                                                                                                                                                                                                                                                                                                                                                                                                                                                                                                                                                                                                                                                                                                                                                                                                                                                                                                                                                                                                                                                                                                                                                                                                                                                                                                                                                                                                                                                                                   |
|           |                                                                                                                                                                                                                                                                                                                                                                                                                                                                                                                                                                                                                                                                                                                                                                                                                                                                                                                                                                                                                                                                                                                                                                                                                                                                                                                                                                                                                                                                                                                                                                                                                                                                                                                                                                                                                                                                                                                                                                                                                                                                                                                                                                                                                                                                                                                                                                                                                                                                                                                                                                                                                                                                                                                                                                                                                             |

SCHOLARONE™  
Manuscripts

1  
2  
3  
4  
5  
6  
7  
8  
9  
10  
11  
12  
13  
14  
15  
16  
17  
18  
19  
20  
21  
22  
23  
24  
25  
26  
27  
28  
29  
30  
31  
32  
33  
34  
35  
36  
37  
38  
39  
40  
41  
42  
43  
44  
45  
46  
47  
48  
49  
50  
51  
52  
53  
54  
55  
56  
57  
58  
59  
60

**DirEct Versus Video LaryngosCope (DEVICE): Protocol and statistical analysis plan for a randomized clinical trial in critically ill adults undergoing emergency tracheal intubation**

Matthew E. Prekker, MD, MPH<sup>1,2</sup>; Brian E. Driver, MD<sup>2</sup>; Stacy A. Trent, MD, MSPH<sup>3,4</sup>; Daniel Resnick-Ault, MD<sup>4</sup>; Kevin P. Seitz, MD, MSc<sup>5</sup>; Derek W. Russell, MD<sup>6,7</sup>; Sheetal Gandotra, MD<sup>6</sup>; John P. Gaillard, MD<sup>8,9</sup>; Kevin W. Gibbs, MD<sup>10</sup>; Andrew J. Latimer, MD<sup>11</sup>; Micah R. Whitson, MD<sup>6,12</sup>; Shekhar A. Ghamande, MD<sup>13</sup>; Derek J. Vonderhaar, MD<sup>14</sup>; Jeremy P. Walco, MD<sup>15</sup>; Sydney J. Hansen, MD<sup>1,2</sup>; Ivor S. Douglas, MD<sup>16,17</sup>; Christopher R. Barnes, MD<sup>18</sup>; Vijay Krishnamoorthy, MD, PhD<sup>19</sup>; Jill J. Bastman, BSN, RN<sup>4</sup>; Bradley D. Lloyd, RRT-ACCS<sup>5</sup>; Sarah W. Robison, MD<sup>6,7</sup>; Jessica A. Palakshappa, MD, MS<sup>9</sup>; Steven H. Mitchell, MD<sup>11</sup>; David B. Page, MD, MSPH<sup>6</sup>; Heath D. White, DO, MS<sup>13</sup>; Alyssa Espinera, MD<sup>14</sup>; Christopher G. Hughes, MD, MSc<sup>15</sup>; Aaron Joffe, DO<sup>18</sup>; J. Taylor Herbert, MD, PhD<sup>19</sup>; LTC Steven G. Schauer, DO, MS<sup>20</sup>; Maj. Brit J. Long, MD<sup>21</sup>; Brant Imhoff, MS<sup>22</sup>; Li Wang, MS<sup>22</sup>; Jillian P. Rhoads, PhD<sup>23</sup>; Kelsey N. Womack, PhD<sup>23</sup>; David R. Janz, MD, MSc<sup>24</sup>; Wesley H. Self, MD, MPH<sup>23,25</sup>; Todd W. Rice, MD, MSc<sup>5</sup>; Adit A. Ginde, MD, MPH<sup>4</sup>; Jonathan D. Casey, MD, MSc<sup>5\*</sup>; Matthew W. Semler, MD, MSc<sup>5\*</sup>; for the DEVICE investigators and the Pragmatic Critical Care Research Group

\*denotes authors contributed equally to this work

1. Department of Medicine, Division of Pulmonary, Allergy, and Critical Care Medicine, Hennepin County Medical Center, Minneapolis, Minnesota, USA
2. Department of Emergency Medicine, Hennepin County Medical Center, Minneapolis, Minnesota, USA
3. Department of Emergency Medicine, Denver Health Medical Center, Denver, Colorado, USA
4. Department of Emergency Medicine, University of Colorado School of Medicine, Aurora, Colorado, USA

- 1  
2  
3 5. Department of Medicine, Division of Pulmonary and Critical Care Medicine, Vanderbilt  
4  
5 University Medical Center, Nashville, Tennessee, USA  
6
- 7 6. Department of Medicine, Division of Pulmonary, Allergy and Critical Care Medicine,  
8  
9 University of Alabama at Birmingham Heersink School of Medicine, Birmingham, Alabama,  
10  
11 USA  
12
- 13 7. Pulmonary Section, Birmingham Veterans Affairs Medical Center, Birmingham, Alabama,  
14  
15 USA  
16
- 17 8. Department of Anesthesiology, Section on Critical Care, Atrium Health Wake Forest Baptist,  
18  
19 Winston-Salem, North Carolina, USA  
20
- 21 9. Department of Emergency Medicine, Atrium Health Wake Forest Baptist, Winston-Salem,  
22  
23 North Carolina, USA  
24
- 25 10. Section on Pulmonary, Critical Care, Allergy, and Immunology, Wake Forest School of  
26  
27 Medicine, Winston-Salem, North Carolina, USA  
28
- 29 11. Department of Emergency Medicine, University of Washington Harborview Medical Center,  
30  
31 Seattle, Washington, USA  
32
- 33 12. Department of Emergency Medicine, University of Alabama at Birmingham Heersink School  
34  
35 of Medicine, Birmingham, Alabama, USA  
36
- 37 13. Department of Medicine, Division of Pulmonary Disease, Critical Care, and Sleep Medicine,  
38  
39 Baylor Scott & White Health, Temple, Texas, USA  
40
- 41 14. Department of Pulmonary and Critical Care Medicine, Ochsner Health, New Orleans,  
42  
43 Louisiana, USA  
44
- 45 15. Department of Anesthesiology, Division of Anesthesia Critical Care Medicine, Vanderbilt  
46  
47 University Medical Center, Nashville, Tennessee, USA  
48
- 49 16. Division of Pulmonary, Critical Care, and Sleep Medicine, Denver Health, Denver, Colorado,  
50  
51 USA  
52  
53  
54  
55  
56  
57  
58  
59  
60

17. Department of Medicine, Division of Pulmonary and Critical Care Medicine, University of Colorado School of Medicine, Aurora, Colorado, USA
18. Department of Anesthesiology and Critical Care Medicine, University of Washington Harborview Medical Center, Seattle, Washington, USA
19. Department of Anesthesiology, Duke University School of Medicine, Durham, North Carolina, USA
20. United States Army Institute of Surgical Research, Joint Base San Antonio-Fort Sam Houston, San Antonio, Texas, USA
21. 59th Medical Wing, United States Air Force, Fort Sam Houston, San Antonio, Texas, USA
22. Department of Biostatistics, Vanderbilt University Medical Center, Nashville, Tennessee, USA
23. Vanderbilt Institute for Clinical and Translational Research, Vanderbilt University Medical Center, Nashville, Tennessee, USA
24. University Medical Center New Orleans and the Department of Medicine, Section of Pulmonary/Critical Care Medicine and Allergy/Immunology, Louisiana State University School of Medicine, New Orleans, Louisiana, USA
25. Department of Emergency Medicine, Vanderbilt University Medical Center, Nashville, Tennessee, USA

Corresponding author:

Matthew E. Prekker, MD, MPH

E-mail:

[matthew.prekker@hcmcd.org](mailto:matthew.prekker@hcmcd.org)

Address:

1  
2  
3 Department of Medicine, Mailcode G5

4  
5 701 Park Avenue South

6  
7 Minneapolis, Minnesota, USA 55415

8  
9  
10  
11 Keywords for indexing:

12  
13 Endotracheal intubation, video laryngoscope, direct laryngoscope

14  
15  
16  
17 Subject Descriptor Number: 4.4 Clinical Trials in Critical Care Medicine

18  
19  
20  
21 Manuscript word count (body only): 4,970

22  
23  
24  
25 Abstract word count: 319

26  
27  
28  
29  
30 Supplemental digital content is available for this article



**Abstract:****Introduction:**

Among critically ill patients undergoing orotracheal intubation in the emergency department (ED) or intensive care unit (ICU), failure to visualize the vocal cords and intubate the trachea on the first attempt is associated with an increased risk of complications. Two types of laryngoscopes are commonly available: direct laryngoscopes and video laryngoscopes. For critically ill adults undergoing emergency tracheal intubation, it remains uncertain whether use of a video laryngoscope increases the incidence of successful intubation on the first attempt compared with use of a direct laryngoscope.

**Methods and Analysis:**

The DirEct Versus Video LaryngosCopE (DEVICE) trial is a prospective, multi-center, non-blinded, randomized trial being conducted in 6 EDs and 10 ICUs in the United States. The trial plans to enroll up to 2,000 critically ill adults undergoing orotracheal intubation with a laryngoscope. Eligible patients are randomized 1:1 to the use of a video laryngoscope or a direct laryngoscope for the first intubation attempt. The primary outcome is successful intubation on the first attempt. The secondary outcome is the incidence of severe complications between induction and 2 minutes after intubation, defined as the occurrence of one or more of the following: severe hypoxemia (lowest oxygen saturation < 80%); severe hypotension (systolic blood pressure < 65 mm Hg or new or increased vasopressor administration); cardiac arrest; or death. Enrollment began on March 16, 2022 and is expected to be completed in 2023.

**Ethics and Dissemination:**

The trial protocol was approved with waiver of informed consent by the single institutional review board at Vanderbilt University Medical Center and the Human Research Protection

1  
2  
3 Office of the Department of Defense. The results will be presented at scientific conferences and  
4 submitted for publication in a peer-reviewed journal.  
5  
6  
7

### 8 9 **Trial Registration**

10  
11 ClinicalTrials.gov registration (NCT05239195) on February 14, 2022, prior to the enrollment of  
12 the first patient.  
13  
14  
15  
16  
17  
18  
19  
20  
21  
22  
23  
24  
25  
26  
27  
28  
29  
30  
31  
32  
33  
34  
35  
36  
37  
38  
39  
40  
41  
42  
43  
44  
45  
46  
47  
48  
49  
50  
51  
52  
53  
54  
55  
56  
57  
58  
59  
60

### Strengths and Limitations of this Study

- This protocol describes in detail the design and methods for a large, pragmatic trial of laryngoscope type for the emergency tracheal intubation of critically ill adults.
- Conduct in the emergency departments and intensive care units of multiple centers among operators with diverse prior experience with tracheal intubation, as well as broad patient eligibility criteria, will increase the external validity of trial results.
- Patients, clinicians, and investigators are not blinded to the study group assignment after randomization.

## Introduction

Tracheal intubation is a common procedure in the emergency department (ED) and intensive care unit (ICU). Among critically ill patients undergoing tracheal intubation, failure to intubate the trachea on the first attempt is associated with increased risk of complications, including hypoxemia, hypotension, aspiration, and cardiac arrest.<sup>1,2</sup>

Emergency tracheal intubation is typically performed in three discrete steps. First, the patient is administered medications to facilitate optimal intubating conditions (rapid sequence induction). Second, a clinician inserts a laryngoscope into the patient's mouth to visualize the vocal cords (laryngoscopy). Third, an endotracheal tube is inserted into the mouth, alongside the laryngoscope, and the tube is advanced past the vocal cords into the trachea (intubation).

The direct laryngoscope, the traditional instrument consisting of a battery-containing handle attached to a blade with a light source, has been used to visualize the vocal cords for tracheal intubation for over 100 years and remains the most commonly used device for the intubation of critically ill adults in the ED or ICU.<sup>2-5</sup> The operator uses the direct laryngoscope to displace the tongue and elevate the epiglottis to facilitate intubation of the trachea under direct visualization. Obtaining an adequate view of the larynx with a direct laryngoscope can be challenging, especially for inexperienced operators. Once a view of the larynx is obtained, passage of the endotracheal tube follows the operator's direct line-of-sight through the mouth to the vocal cords.

Over the last two decades, video laryngoscopes have provided an alternative to direct laryngoscopes for visualizing the vocal cords to facilitate tracheal intubation.<sup>6,7</sup> A camera embedded near the tip of the video laryngoscope blade transmits an image of the vocal cords to a screen that the operator can view during the procedure.<sup>8</sup> Because the camera is located near the tip of the laryngoscope blade, obtaining a view of the larynx may be easier with a video laryngoscope compared with a direct laryngoscope. However, because this view can be obtained without generating a direct line-of-sight through the mouth to the vocal cords, the

1  
2  
3 process of passing an endotracheal tube may be more difficult when using a video  
4 laryngoscope. When considering both aspects of tracheal intubation, visualizing the vocal cords  
5 and passing the endotracheal tube, it remains uncertain whether use of a video laryngoscope  
6 increases the incidence of successful intubation on the first attempt.  
7  
8  
9  
10

11         Among elective tracheal intubations in the operating room, use of video laryngoscope  
12 probably increases the incidence of successful intubation on the first attempt and decreases  
13 complications compared to use of a direct laryngoscope, supported with moderate certainty in  
14 the existing anesthesiology literature.<sup>9</sup> Extrapolating the results of randomized clinical trials  
15 conducted in the operating room to non-operating room settings is problematic because of  
16 factors related to the patient, the operator, and the environment.<sup>10,11</sup> Because tracheal intubation  
17 of critically ill adults outside of the operating room is common, complications of intubation in the  
18 ED and ICU are common, and use of a video laryngoscope during intubation in the ED and ICU  
19 has increased significantly over time,<sup>9,12</sup> understanding the effects of use of a video  
20 laryngoscope vs direct laryngoscope on successful intubation on the first attempt in these  
21 settings is a priority.  
22  
23  
24  
25  
26  
27  
28  
29  
30  
31  
32  
33

34         Previous trials randomizing patients to use of a video laryngoscope or a direct  
35 laryngoscope during emergency tracheal intubation in prehospital<sup>13–18</sup>, ED<sup>19–25</sup>, and ICU  
36 settings<sup>26–32</sup> have been small and heterogeneous and have generally suggested that while a  
37 video laryngoscope improves the view of the larynx and reduces the incidence of esophageal  
38 intubation, it may not affect the incidence of successful intubation on the first attempt. Findings  
39 were similar in the largest such trial to date, a 371-patient, multicenter, randomized clinical trial  
40 in French medical ICUs in which use of video laryngoscope failed to improve successful  
41 intubation on the first attempt (68% vs. 70%;  $p = 0.60$ ) and was associated with a greater  
42 incidence of severe peri-procedural complications in post-hoc analyses.<sup>33</sup>  
43  
44  
45  
46  
47  
48  
49  
50  
51  
52  
53

54         The sample size of these prior trials did not provide sufficient statistical power to  
55 definitively rule out a clinically important effect of use of a video laryngoscope vs direct  
56  
57  
58  
59  
60

1  
2  
3 laryngoscope on successful intubation on the first laryngoscopy attempt or the incidence of  
4 complications. To compare the effectiveness of these two commonly used devices during this  
5 important emergency procedure, a large trial conducted across a wide variety of clinical  
6 settings, operator specialties, and levels of operator experience is required. Therefore, we  
7 designed the DirEct Versus Video LaryngosCopE (DEVICE) trial to test the hypothesis that,  
8 among critically ill adults undergoing emergency tracheal intubation in the ED or ICU, use of a  
9 video laryngoscope will increase the incidence of successful intubation on the first attempt  
10 compared with use of a direct laryngoscope.  
11  
12  
13  
14  
15  
16  
17  
18  
19  
20  
21

## 22 **Methods and Analysis**

23  
24 This manuscript was written in accordance with Standard Protocol Items:  
25 Recommendations for Interventional Trials (SPIRIT) guidelines (Figure 1; supplementary file,  
26 section 1).<sup>34</sup>  
27  
28  
29  
30  
31

### 32 *Patient and Public Involvement*

33  
34 Materials used to communicate details of the study with patients and family members  
35 were developed with input from the Vanderbilt Community Advisory Council. Study authors will  
36 disseminate the results of this study online and via social media in forms suitable for public  
37 understanding.  
38  
39  
40  
41  
42  
43  
44

### 45 *Study Design*

46  
47 The DirEct Versus Video LaryngosCopE (DEVICE) trial is a pragmatic, multicenter,  
48 unblinded, parallel-group, randomized trial comparing use of a video laryngoscope to use of a  
49 direct laryngoscope for the first attempt at emergency tracheal intubation among critically ill  
50 adults in the ED and ICU. The primary outcome is successful intubation on the first attempt. An  
51  
52  
53  
54  
55  
56  
57  
58  
59  
60

1  
2  
3 independent data and safety monitoring board (DSMB) is monitoring the progress and safety of  
4 the trial. Study institutions and investigators are listed in the supplementary file, section 2.  
5  
6  
7

### 8 9 *Study Population*

10  
11 The inclusion criteria for this study are:

- 12 1. Patient is located in a participating unit
- 13 2. Planned procedure is orotracheal intubation using a laryngoscope.
- 14 3. Planned operator is a clinician expected to routinely perform tracheal intubation in the  
15 participating unit.  
16  
17  
18  
19  
20  
21

22 The exclusion criteria for the study are:

- 23 1. Patient is known to be less than 18 years old
- 24 2. Patient is known to be pregnant.
- 25 3. Patient is known to be a prisoner.
- 26 4. Immediate need for tracheal intubation precludes safe performance of study procedures.
- 27 5. Operator has determined that use of a video laryngoscope or use of a direct  
28 laryngoscope is required or contraindicated for the optimal care of the patient.  
29  
30  
31  
32  
33  
34  
35  
36  
37  
38

### 39 *Randomization and Treatment Allocation*

40  
41 Patients are randomized in a 1:1 ratio to undergo intubation using a video laryngoscope  
42 or using a direct laryngoscope for the first attempt in permuted blocks of variable size, stratified  
43 by study site. Study-group assignments are generated using a computerized randomization  
44 sequence, placed in sequentially numbered opaque envelopes, and distributed to enrolling  
45 sites. Before opening the envelope, the operator determines that the patient meets eligibility  
46 criteria, records the predicted difficulty of intubation (“easy”, “moderate”, or “difficult”) and  
47 selects the blade shape the operator plans to use if the patient is randomized to the video  
48 laryngoscope group (“hyperangulated” or “non-hyperangulated / standard geometry”). The  
49  
50  
51  
52  
53  
54  
55  
56  
57  
58  
59  
60

1  
2  
3 operator or delegate then opens the envelope. Patients are enrolled once the envelope is  
4 opened to reveal the study group assignment. After enrollment and randomization, patients,  
5 treating clinicians, and study personnel are not blinded to study group assignment.  
6  
7  
8  
9

## 10 11 *Study Interventions*

### 12 13 *Video Laryngoscope Group*

14  
15 For patients assigned to the video laryngoscope group, operators are instructed to use a  
16 video laryngoscope on the first laryngoscopy attempt. A video laryngoscope is defined as a  
17 laryngoscope with a camera and a video screen. Trial protocol does not dictate the brand of  
18 video laryngoscope or the geometry of the laryngoscope blade (e.g. hyperangulated vs. non-  
19 hyperangulated), but these details will be recorded. Operators are encouraged, but not required,  
20 to view the video screen during laryngoscopy (“indirect laryngoscopy”) and tracheal intubation.  
21  
22  
23  
24  
25  
26  
27  
28  
29

### 30 31 *Direct Laryngoscope Group*

32  
33 For patients assigned to the direct laryngoscope group, operators are instructed to use a  
34 direct laryngoscope on the first laryngoscopy attempt. A direct laryngoscope is defined as a  
35 laryngoscope without a camera and a video screen. Trial protocol does not dictate the brand of  
36 direct laryngoscope or the geometry of the laryngoscope blade (e.g. curved [Macintosh] vs.  
37 straight [Miller]), but these details will be recorded.  
38  
39  
40  
41  
42  
43  
44

### 45 46 *Co-Interventions and Subsequent Attempts at Laryngoscopy and Intubation*

47  
48 Study group assignment determines only the type of laryngoscope (video vs direct) used  
49 on the first laryngoscopy attempt. If determined to be required to ensure optimal care of the  
50 patient, treating clinicians may use any device at any time, regardless of study group  
51 assignment. Cases in which clinicians use a laryngoscope discordant with randomized  
52 assignment on the first intubation attempt will be documented and tracked. All aspects of the  
53  
54  
55  
56  
57  
58  
59  
60



1  
2  
3 intubation procedure, except the type of laryngoscope used on the first attempt, are at the  
4 discretion of treating clinicians, including selection of sedative and neuromuscular blocking  
5 medications, patient positioning, approach to pre-oxygenation, use of a bougie or a stylet, and  
6 endotracheal tube size. Best practices in tracheal intubation will be encouraged according to  
7 clinical protocols at the study sites. The trial intervention ends after the first attempt at  
8 laryngoscopy. If the first attempt is unsuccessful, the operator may use any method of intubation  
9 on subsequent intubation attempts, including use of a direct laryngoscope in the video  
10 laryngoscope group or use of a video laryngoscope in the direct laryngoscope group. The type  
11 of laryngoscope used during the initial and final laryngoscopy attempt will be collected and  
12 reported.  
13  
14  
15  
16  
17  
18  
19  
20  
21  
22  
23  
24  
25

#### 26 *Data Collection*

27  
28 A trained observer, not directly involved with the intubation procedure, collects data for  
29 key peri-procedural outcomes. These outcomes include successful intubation on the first  
30 attempt, time interval between laryngoscopy and successful intubation, the oxygen saturation  
31 and systolic blood pressure at induction, the lowest oxygen saturation and systolic blood  
32 pressure between induction and 2 minutes after successful intubation, and new or increased  
33 vasopressor administration between induction and 2 minutes after successful intubation.  
34  
35 Observers may be clinical personnel on the enrolling unit (e.g., physician, nurse, or pharmacist)  
36 or research study personnel.  
37  
38  
39  
40  
41  
42  
43  
44

45 Immediately following the intubation procedure, the operator completes a paper data  
46 collection form to record the approach to preoxygenation, oxygenation and ventilation between  
47 induction and laryngoscopy, the brand of laryngoscope used, the blade shape, the Cormack-  
48 Lehane grade of laryngeal view<sup>35</sup>, use of the video screen to visualize the larynx (if applicable),  
49 use of a bougie or a stylet, reasons for failure to intubate on the first attempt (if applicable),  
50 intubation approaches on subsequent attempts, difficult airway characteristics observed before  
51  
52  
53  
54  
55  
56  
57  
58  
59  
60

1  
2  
3 or during the procedure (facial trauma, small mouth opening, limited neck mobility, cervical  
4 collar, large neck, obesity, fluids obscuring view of vocal cords, upper airway obstruction or  
5 edema), and complications of intubation (witnessed pulmonary aspiration, esophageal  
6 intubation, injury to airways, injury to teeth, cardiac arrest between induction and 2 minutes  
7 following intubation). Operators record their specialty, training level, and estimates of the  
8 number of previous intubations they have performed and the number of previous intubations  
9 they have performed using a direct laryngoscope.  
10  
11  
12  
13  
14  
15  
16

17  
18 Study personnel at each site review the medical record to collect data on baseline  
19 patient characteristics, pre- and post-laryngoscopy management, and clinical outcomes at 28  
20 days after enrollment.  
21  
22  
23  
24  
25

26 The following variables are collected:  
27

- 28 1. Baseline: Age, sex, height, weight, race, ethnicity, Acute Physiology and Chronic Health  
29 Evaluation II (APACHE II) score<sup>36</sup>, active medical problems at the time of enrollment,  
30 comorbidities, indication for intubation, vasopressor receipt in the hour prior to  
31 enrollment, highest FIO<sub>2</sub> in the hour prior to enrollment, lowest SpO<sub>2</sub>/FIO<sub>2</sub> (or PaO<sub>2</sub>/FIO<sub>2</sub>)  
32 ratio in the hour prior to enrollment, pre-procedural Glasgow Coma Scale (GCS) score<sup>37</sup>,  
33 oxygen delivery device at enrollment, assessment of the likelihood of a difficult  
34 intubation, presence of difficult airway characteristics (limited mouth opening, small  
35 mandible, large tongue, short neck, large neck circumference, limited anatomic neck  
36 mobility, cervical immobilization due to trauma, obesity), operator's level of training and  
37 specialty, operator's prior intubation experience.  
38  
39  
40  
41  
42  
43  
44  
45  
46  
47  
48
- 49 2. Peri-procedural: Lowest SpO<sub>2</sub> from enrollment to induction, approach to and duration of  
50 pre-oxygenation, time of sedative administration, sedative agent and dose administered,  
51 neuromuscular blocking agent and dose administered, SpO<sub>2</sub> and systolic blood pressure  
52 at the time of induction, approach to oxygen administration and ventilation between  
53  
54  
55  
56  
57  
58  
59  
60

1  
2  
3 induction and the first attempt at laryngoscopy, time of start of first laryngoscopy attempt,  
4 laryngoscope used on first attempt (model, blade size, blade shape), use of video screen  
5 (if applicable) on the first laryngoscopy attempt, best Cormack-Lehane grade of view<sup>35</sup>  
6 on the first laryngoscopy attempt, presence of body fluid obstructing view of the larynx,  
7 presence of upper airway obstruction or edema, number of intubation attempts (number  
8 of times the laryngoscope entered the mouth, number of times the bougie entered mouth  
9 [if applicable], number of times the endotracheal tube entered the mouth), reason for  
10 failure of the first intubation attempt (if applicable), procedural adjustments made for the  
11 final intubation attempt, esophageal intubation, injury to teeth, operator-reported  
12 pulmonary aspiration between induction and intubation, time of successful tracheal  
13 intubation, endotracheal tube size, lowest SpO<sub>2</sub> from induction until 2 minutes after  
14 intubation, lowest systolic blood pressure from induction until 2 minutes after intubation,  
15 new or increased vasopressor administration from induction until 2 minutes after  
16 intubation, cardiac arrest from induction until 2 minutes after intubation not resulting in  
17 death within 1 hour of induction, cardiac arrest from induction until 2 minutes after  
18 intubation resulting in death within 1 hour of induction.

- 19  
20  
21  
22  
23  
24  
25  
26  
27  
28  
29  
30  
31  
32  
33  
34  
35  
36  
37 3. 24 hours after enrollment: new pneumothorax detected in the first 24 hours after  
38 induction, vasopressor receipt at 24 hours after induction, SpO<sub>2</sub> at 24 hours after  
39 induction, FIO<sub>2</sub> at 24 hours after induction, positive end-expiratory pressure (PEEP) at  
40 24 hours after induction, systolic blood pressure at 24 hours after induction.  
41  
42  
43  
44  
45 4. In-Hospital Outcomes: Ventilator-free days in the first 28 days, ICU-free days in the first  
46 28 days, and in-hospital mortality at 28 days. Definitions for ICU-free days and ventilator-  
47 free days are provided in the supplementary file, sections 3 and 4.  
48  
49  
50  
51  
52  
53

#### 54 *Primary Outcome*

55  
56 The primary outcome is successful intubation on the first attempt. Successful intubation  
57  
58  
59  
60

1  
2  
3 on the first attempt is defined as placement of an endotracheal tube in the trachea following a  
4 single insertion of a laryngoscope blade into the mouth and *either* a single insertion of an  
5 endotracheal tube into the mouth *or* a single insertion of a bougie into the mouth followed by a  
6 single insertion of an endotracheal tube into the mouth.  
7  
8  
9  
10

11 Data for the assessment of the primary outcome are collected by a trained independent  
12 observer using a structured data collection form that records the number of insertions of the  
13 laryngoscope blade, bougie (if used), and endotracheal tube into the patient's mouth. In the  
14 event that data from the independent observer are missing, data from the operator's self-report  
15 of successful intubation on the first attempt will be used.  
16  
17  
18  
19  
20  
21  
22  
23

#### 24 *Secondary Outcome*

25 The secondary outcome is the incidence of severe complications occurring between  
26 induction and 2 minutes following successful intubation. Severe complications are defined as  
27 one or more of the following:  
28  
29  
30  
31

- 32 - Severe hypoxemia (lowest oxygen saturation measured by pulse oximetry < 80%);
- 33 - Severe hypotension (systolic blood pressure < 65 mm Hg or new or increased  
34 vasopressor administration);
- 35 - Cardiac arrest not resulting in death
- 36 - Cardiac arrest resulting in death
- 37
- 38
- 39
- 40
- 41
- 42

43 Cardiac arrest will be considered to have resulted in death if a patient who experienced cardiac  
44 arrest between induction and 2 minutes after intubation died within the 1 hour following  
45 intubation.  
46  
47  
48  
49  
50  
51  
52  
53  
54  
55  
56  
57  
58  
59  
60

### *Exploratory Outcomes*

Exploratory procedural outcomes are as follows:

- Duration of laryngoscopy and tracheal intubation. This is defined as the interval (in seconds) between the first insertion of a laryngoscope blade into the mouth and the final placement of an endotracheal tube or tracheostomy tube in the trachea.
- Number of laryngoscopy attempts
- Number of attempts to cannulate the trachea with a bougie or endotracheal tube
- Successful intubation on the first attempt without a severe complication
- Reason for failure to intubate the trachea on the first attempt, which include:
  - Inadequate view of the larynx
  - Inability to intubate the trachea with an endotracheal tube
  - Inability to cannulate the trachea with a bougie
  - Attempt aborted due to a change in patient condition (e.g. worsened hypoxemia, hypotension, bradycardia, vomiting, bleeding)
  - Technical failure of the laryngoscope (e.g. battery, light source, camera, screen)
  - Other
- Operator-reported aspiration

Exploratory safety outcomes are as follows:

- Esophageal intubation
- Injury to the teeth

Exploratory clinical outcomes are as follows:

- ICU-free days in the first 28 days
- Ventilator-free days in the first 28 days
- 28-day all-cause in-hospital mortality

### *Sample Size Estimation*

The minimum clinically important difference in successful intubation on the first attempt that would be needed to justify routine use of a video laryngoscope rather than a direct laryngoscope in the ED and ICU is uncertain. The current trial is designed to detect a 5% absolute difference between groups in the incidence of successful intubation on the first attempt. An absolute difference of 5% in successful intubation on the first attempt is similar to or smaller than the difference used in the design of prior airway management trials and is considered by airway management experts to be clinically meaningful.<sup>21,28,38,39</sup> Assuming (1) an incidence of successful intubation on the first attempt of 80% in the direct laryngoscope group, (2) 90% statistical power, (3) a two-sided alpha of 0.05, and (4) enrollment at 16 sites with an intra-cluster correlation for the primary outcome of 0.05, we calculated that detecting a 5% absolute increase in the incidence of successful intubation on the first attempt would require enrollment of 1,920 patients (960 per group). Anticipating missing data for up to 4% of enrolled patients, we will plan to enroll a total of 2,000 patients (1,000 per group).

### *Data and Safety Monitoring Board (DSMB) and Interim Analysis*

A DSMB composed of experts with backgrounds in emergency medicine, pulmonary and critical care medicine, anesthesiology, bioethics, and biostatistics has overseen the design of the trial and is monitoring its conduct. The DSMB will review a single interim analysis prepared by the study biostatistician at the anticipated halfway point of the trial, after enrollment of 1,000 patients. The stopping boundary for efficacy was pre-specified as a P-value of 0.001 or less, using a chi-square test, for the difference in the incidence of the primary outcome between groups. This conservative Haybittle–Peto boundary was selected to allow the final analysis to be performed using an unchanged level of significance ( $P < 0.05$ ). The DSMB retains the authority to stop the trial at any point, request additional data or interim analyses, or request modifications of the study protocol to protect patient safety. Trial safety monitoring and handling of adverse

1  
2  
3 events are described in detail in the supplementary file, section 5. Patient privacy and data  
4 storage details are listed in the supplementary file, section 6.  
5  
6  
7

### 8 9 *Statistical Analysis Principles*

10  
11 Analyses will be conducted following reproducible research principles using R (R  
12 Foundation for Statistical Computing, Vienna, Austria).<sup>40</sup> We will present summary tabulations  
13 by treatment group. For categorical variables, the number and proportion of patients will be  
14 presented. For continuous variables, the mean and standard deviation or median and  
15 interquartile range will be presented, as appropriate.  
16  
17  
18  
19  
20  
21

22 We will analyze a single pre-specified primary outcome and a single pre-specified  
23 secondary outcome using a chi-square test. Consistent with recommendations of the Food and  
24 Drug Administration<sup>41</sup> and the European Medicines Agency<sup>42</sup>, each will be tested using a two-  
25 sided P value with a significance level of 0.05. The primary analysis will occur in an intent-to-  
26 treat fashion among all patients randomized, excluding only those patients whose data was  
27 withdrawn from the study. For all other analyses except safety analyses, emphasis will be  
28 placed on the estimate of effect size with 95% confidence intervals, as recommended by the  
29 *International Committee of Medical Journal Editors*<sup>43</sup>, and no corrections for multiple  
30 comparisons will be performed.  
31  
32  
33  
34  
35  
36  
37  
38  
39  
40  
41

### 42 *Main Analysis of the Primary Outcome*

43  
44 The main analysis will be an unadjusted, intention-to-treat comparison of successful  
45 intubation on the first attempt between patients randomized to the video laryngoscope group  
46 and patients randomized to the direct laryngoscope group, using a chi-square test. The  
47 difference in proportions, the associated 95% confidence interval, and a p value for the primary  
48 outcome will be presented.  
49  
50  
51  
52  
53  
54  
55  
56  
57  
58  
59  
60

## Secondary Analyses of the Primary Outcome

### *Multivariable modeling to account for covariates*

To account for relevant covariates, we will develop a generalized linear mixed effects model using a logit link function with the primary outcome as the dependent variable, study site as a random effect, and fixed effects of study group and the following pre-specified baseline covariates: age, sex, body-mass index, operator experience quantified as the operator's total number of prior intubations, and location of intubation (ED vs ICU). All continuous variables will be modeled assuming a nonlinear relationship to the outcome using restricted cubic splines with between 3 and 5 knots.

### *Effect Modification*

We will examine whether pre-specified baseline variables modify the effect of study group assignment (video laryngoscope vs direct laryngoscope) on the primary outcome using a formal test of statistical interaction in a generalized linear mixed effects model with the primary outcome as the dependent variable, study site as a random effect, and fixed effects of study group, the pre-specified proposed effect modifier, and the interaction between the two. For categorical variables, we will present the odds ratio and 95% confidence intervals within each pre-specified subgroup. Continuous variables will not be dichotomized for analysis of effect modification but may be dichotomized for data presentation. In accordance with the Instrument for assessing the Credibility of Effect Modification Analyses (ICEMAN) recommendations<sup>44</sup>, we have prespecified the following limited number of baseline variables as potential effect modifiers and the hypothesized direction of effect modification for each:

1. Patient location (ED vs ICU). We hypothesize that patient location will not modify the effect of study group assignment on the primary outcome.
2. Traumatic injury (Yes vs No). We hypothesize that traumatic injury will modify the effect of study group assignment on the primary outcome, with a greater increase in the



1  
2  
3 incidence of successful intubation on the first attempt with use of a video laryngoscope  
4 compared with a direct laryngoscope among patients with traumatic injury compared to  
5 patients without traumatic injury.  
6  
7

8  
9  
10 3. Body mass index (kg/m<sup>2</sup>). We hypothesize that body mass index will modify the effect of  
11 study group assignment on the primary outcome, with a greater increase in the  
12 incidence of successful intubation on the first attempt with use of a video laryngoscope  
13 compared with a direct laryngoscope among patients with higher body mass index as  
14 compared to patients with lower body mass index. This hypothesis of effect modification  
15 is supported by a non-significant trend toward effect modification in a meta-analysis of  
16 multiple prior randomized trials.<sup>9</sup>  
17  
18

19  
20 4. Operator's pre-enrollment assessment of the anticipated difficulty of intubation (Easy;  
21 Moderate; Difficult; Not Recorded). We hypothesize that the operator's pre-enrollment  
22 assessment will modify the effect of study group assignment on the primary outcome,  
23 with a greater increase in the incidence of successful intubation on the first attempt with  
24 use of a video laryngoscope compared with a direct laryngoscope among patients  
25 assessed as Difficult or Moderate compared to Easy. This hypothesis of effect  
26 modification is supported by significant effect modification in a meta-analysis of multiple  
27 prior randomized trials.<sup>9</sup>  
28  
29

30  
31 5. Operator experience at the time of enrollment.  
32

33  
34 1. Total number of previous intubations performed by operator. We hypothesize that  
35 the total number of previous intubations performed by the operator will modify the  
36 effect of study group assignment on the primary outcome, with a greater increase  
37 in the incidence of successful intubation on the first attempt with use of a video  
38 laryngoscope compared with a direct laryngoscope among operators with fewer  
39 previous intubations compared to operators with a greater number of previous  
40 intubations. This hypothesis of effect modification is supported by significant  
41  
42

1  
2  
3 effect modification observed in a prior randomized trial among critically ill adults,  
4 but differs from a meta-analysis including trials of intubation in the operating  
5 room that did not observe effect modification based on the operator's prior  
6 experience.<sup>9,28</sup>  
7  
8  
9

- 10  
11 2. Proportion of previous intubations performed by the operator using a direct  
12 laryngoscope. We hypothesize that the proportion of previous intubations  
13 performed by the operator using a direct laryngoscope will modify the effect of  
14 study group assignment on the primary outcome, with a greater increase in the  
15 incidence of successful intubation on the first attempt with use of a video  
16 laryngoscope compared with a direct laryngoscope among operators with a lower  
17 proportion of previous intubations performed by the operator using a direct  
18 laryngoscope compared to operators with a higher proportion of previous  
19 intubations performed by the operator using a direct laryngoscope.  
20  
21  
22  
23  
24  
25  
26  
27  
28  
29  
30

31  
32 We will also perform an effect modification analysis for the primary outcome that includes a  
33 three-way interaction between study group, total number of previous intubations performed by  
34 the operator, and proportion of previous intubations performed by the operator using a direct  
35 laryngoscope.  
36  
37  
38  
39  
40  
41  
42

### 43 *Sensitivity Analyses of the Primary Outcome*

44

45 We will assess the robustness of the findings of the primary analysis in a number of  
46 sensitivity analyses. First, because operators may choose to deviate from the assigned  
47 laryngoscope for the safety of the patient, we will repeat the primary analysis, but will consider  
48 patients for whom the operator crossed over on the first attempt from the assigned  
49 laryngoscope type to the non-assigned laryngoscope type not to have experienced successful  
50 intubation on the first attempt. Second, we will repeat the primary analysis among only patients  
51  
52  
53  
54  
55  
56  
57  
58  
59  
60

1  
2  
3 for whom data on the primary outcome from the independent observer is available (i.e.,  
4  
5 excluding cases in which operator self-report was the sole source of information for the primary  
6  
7 outcome). Third, because the operator's prior experience with each type of laryngoscope may  
8  
9 affect the likelihood of success with a video laryngoscope compared with a direct laryngoscope,  
10  
11 we will repeat the primary analysis among only cases in which the proportion of prior intubations  
12  
13 the operator has performed using a direct laryngoscope is between 0.25 and 0.75.  
14  
15

### 16 17 18 *Analysis of the Secondary Outcome*

19  
20 For the secondary outcome, severe complications occurring between induction and 2  
21  
22 minutes following intubation, we will perform an unadjusted, intention-to-treat comparison of  
23  
24 patients randomized to the video laryngoscope group versus patients randomized to the direct  
25  
26 laryngoscope group, using a chi-square test.  
27  
28

### 29 30 31 *Analyses of Exploratory Outcomes*

32  
33 For all pre-specified exploratory outcomes, we will conduct unadjusted, intention-to-treat  
34  
35 analyses comparing patients randomized to the video laryngoscope group versus patients  
36  
37 randomized to the direct laryngoscope group. We will calculate absolute risk differences or  
38  
39 differences in medians between groups with the associated 95% confidence intervals.  
40  
41

### 42 43 *Handling of Missing Data*

44  
45 We anticipate that no data on the primary outcome will be missing. When data are  
46  
47 missing for the secondary or exploratory outcomes, we will perform complete-case analysis,  
48  
49 excluding cases where the data for the analyzed outcome are missing. There will be no  
50  
51 imputation of missing data for these outcomes. In adjusted analyses, missing data for covariates  
52  
53 will be imputed using multiple imputations.  
54  
55  
56  
57  
58  
59  
60

### *Trial status*

The DirEct Versus Video LaryngosCopE (DEVICE) trial is a prospective, multi-center, non-blinded randomized clinical trial comparing use of a video laryngoscope to use of a direct laryngoscope for the first attempt at tracheal intubation of critically ill adults in the ED and ICU. Patient enrollment began on 16 March 2022 and is being conducted in 6 EDs and 10 ICUs in the United States.

## **Ethics and Dissemination**

### *Waiver of Informed Consent*

Critically ill patients undergoing tracheal intubation in the ED or ICU are at significant risk for morbidity and mortality from their underlying illness. Most patients undergoing tracheal intubation in routine clinical care are intubated using either a video laryngoscope or a direct laryngoscope on the first attempt. Any benefits or risks of these two approaches are experienced by patients undergoing tracheal intubation in clinical care, outside the context of research. As a requirement for enrollment in the DEVICE trial, the patient's treating clinician must believe that either a video laryngoscope or a direct laryngoscope would be a safe and reasonable approach for the patient (otherwise the patient is excluded). Therefore, making the decision between the two approaches randomly (by study group assignment) rather than by a clinician who thinks either approach is safe and reasonable for the patient is expected to pose no more than minimal additional risk.

Obtaining informed consent for participation in the study would be impracticable. The majority of patients undergoing emergency tracheal intubation lack decisional capacity due to their underlying critical illness and surrogate decision makers are frequently absent. Further, emergency tracheal intubation is a time-sensitive procedure with only minutes between the decision to perform intubation and the completion of the procedure. Meaningful informed consent could not be executed in this brief window and attempting to obtain informed consent

1  
2  
3 would lead to potentially deleterious and unethical delays in intubation which would increase the  
4 risk of hypoxemia, hypotension, and periprocedural cardiac arrest.  
5  
6

7 Because the study involves minimal incremental risk, the study would not adversely  
8 affect the welfare or privacy rights of the participant, and obtaining informed consent would be  
9 impracticable, a waiver of informed consent was requested from and approved by the single  
10 institutional review board at Vanderbilt University Medical Center (reference number 211272).  
11 This is consistent with previous randomized trials comparing alternative approaches to tracheal  
12 intubation commonly used in clinical care.<sup>28,38,39,45-50</sup> This approach was approved by the US  
13 Department of Defense (DoD) Defense Health Agency Human Research Protection Office  
14 (EIRB# 944893).  
15  
16  
17  
18  
19  
20  
21  
22  
23  
24  
25

### 26 *Information for Patients and Families*

27 Information regarding the study is made available to patients and families using a patient  
28 and family information sheet. The patient and family information sheet contains information on  
29 the purpose of the trial, study procedures, risks and discomforts, benefits, use of protected  
30 health information, confidentiality, and investigator contact information. The Defense Health  
31 Agency Human Research Protection Office determined that this procedure meets the  
32 requirements of 32 CFR 219 and DODI 3216.02\_AFI40-402. At centers with a significant  
33 population of non-English speaking patients, the patient and family information sheet has been  
34 translated into Spanish and Somali languages and is made available to those patients.  
35  
36  
37  
38  
39  
40  
41  
42  
43  
44  
45  
46

### 47 *Protocol Changes*

48 Any further amendments to the protocol will be recorded on ClinicalTrials.gov as per  
49 SPIRIT guidelines. See the supplementary file, section 7, for details on how protocol changes  
50 will be handled.  
51  
52  
53  
54  
55  
56  
57  
58  
59  
60

1  
2  
3 *Dissemination Plan*  
4

5           Trial results will be submitted to a peer-reviewed journal and will be presented at one or  
6  
7 more scientific conferences.  
8  
9

10  
11  
12  
13  
14  
15  
16  
17  
18  
19  
20  
21  
22  
23  
24  
25  
26  
27  
28  
29  
30  
31  
32  
33  
34  
35  
36  
37  
38  
39  
40  
41  
42  
43  
44  
45  
46  
47  
48  
49  
50  
51  
52  
53  
54  
55  
56  
57  
58  
59  
60

For peer review only

### Authors' Contributions

Approved the final version of this manuscript and critical revision of the manuscript for important intellectual content: all authors. Study concept and design: MEP, BED, SAT, SGS, BJL, DRG, WHS, TWR, AAG, JDC, MWS. Acquisition of data: all authors. Drafting of the manuscript and study supervision: MEP, BED, SAT, JDC, MWS.

### Competing Interests

Matthew W. Semler was supported by the National Heart Lung and Blood Institute (K23HL143053). Jonathan D. Casey was supported by the National Heart Lung and Blood Institute (K23HL153584-01). John P. Gaillard received support from the CHEST Foundation for instruction and travel. Todd W. Rice was supported in part by the National Institutes of Health and received consulting payments from Cumberland Pharmaceuticals, Inc. and Cytovale, Inc., and served on a data safety and monitoring board for Sanofi, Inc. All other authors have no competing interests.

### Funding

The research was funded in part by the Department of Defense, Defense Health Agency, J9 Office, RESTORAL program. Data collection utilized the Research Electronic Data Capture (REDCap) tool developed and maintained with Vanderbilt Institute for Clinical and Translational Research grant support (UL1 TR000445 from NCATS/NIH). The funding institutions had no role in (1) conception, design, or conduct of the study, (2) collection, management, analysis, interpretation, or presentation of the data, or (3) preparation, review, or approval of the manuscript. The views expressed are those of the authors and do not reflect the official views or policy of the Department of Defense or its components.

## References

1. Sakles JC, Chiu S, Mosier J, Walker C, Stolz U. The importance of first pass success when performing orotracheal intubation in the emergency department. *Acad Emerg Med* 2013;20(1):71–8.
2. Russotto V, Myatra SN, Laffey JG, et al. Intubation Practices and Adverse Peri-intubation Events in Critically Ill Patients From 29 Countries. *JAMA* 2021;325(12):1164–72.
3. Janeway HH. Intra-tracheal anesthesia from the standpoint of the nose, throat and oral surgeon with a description of a new instrument for catheterizing the trachea. *Laryngoscope* 1913;23(11):1082.
4. Miller RA. A NEW LARYNGOSCOPE. *Anesthesiology* 1941;2(3):317–20.
5. Macintosh RR. A NEW LARYNGOSCOPE. *Lancet* 1943;241(6233):205.
6. Kaplan MB, Ward DS, Berci G. A new video laryngoscope—an aid to intubation and teaching. *J Clin Anesth* 2002;14(8):620–6.
7. Cooper RM, Pacey JA, Bishop MJ, McCluskey SA. Early clinical experience with a new videolaryngoscope (GlideScope) in 728 patients. *Can J Anaesth* 2005;52(2):191–8.
8. Berkow LC, Morey TE, Urdaneta F. The Technology of Video Laryngoscopy. *Anesth Analg* 2018;126(5):1527–34.
9. Hansel J, Rogers AM, Lewis SR, Cook TM, Smith AF. Videolaryngoscopy versus direct laryngoscopy for adults undergoing tracheal intubation. *Cochrane Database Syst Rev* 2022;4:CD011136.
10. Cook TM, Woodall N, Harper J, Benger J, Fourth National Audit Project. Major complications of airway management in the UK: results of the Fourth National Audit Project of the Royal College of Anaesthetists and the Difficult Airway Society. Part 2: intensive care and emergency departments. *Br J Anaesth* 2011;106(5):632–42.
11. Karamchandani K, Wheelwright J, Yang AL, Westphal ND, Khanna AK, Myatra SN. Emergency Airway Management Outside the Operating Room: Current Evidence and Management Strategies. *Anesth Analg* 2021;133(3):648–62.
12. Monette DL, Brown CA 3rd, Benoit JL, et al. The Impact of Video Laryngoscopy on the Clinical Learning Environment of Emergency Medicine Residents: A Report of 14,313 Intubations. *AEM Educ Train* 2019;3(2):156–62.
13. Trimmel H, Kreutziger J, Fertsak G, Fitzka R, Dittrich M, Voelckel WG. Use of the Airtraq laryngoscope for emergency intubation in the prehospital setting: a randomized control trial. *Crit Care Med* 2011;39(3):489–93.
14. Arima T, Nagata O, Miura T, et al. Comparative analysis of airway scope and Macintosh laryngoscope for intubation primarily for cardiac arrest in prehospital setting. *Am J Emerg Med* 2014;32(1):40–3.
15. Trimmel H, Kreutziger J, Fitzka R, et al. Use of the GlideScope Ranger Video



- 1  
2  
3 Laryngoscope for Emergency Intubation in the Prehospital Setting: A Randomized Control  
4 Trial. *Crit Care Med* 2016;44(7):e470–6.  
5
- 6 16. Ducharme S, Kramer B, Gelbart D, Colleran C, Risavi B, Carlson JN. A pilot, prospective,  
7 randomized trial of video versus direct laryngoscopy for paramedic endotracheal intubation  
8 [Internet]. *Resuscitation*. 2017;114:121–6. Available from:  
9 <http://dx.doi.org/10.1016/j.resuscitation.2017.03.022>  
10
- 11 17. Kreutziger J, Hornung S, Harrer C, et al. Comparing the McGrath Mac Video Laryngoscope  
12 and Direct Laryngoscopy for Prehospital Emergency Intubation in Air Rescue Patients: A  
13 Multicenter, Randomized, Controlled Trial. *Crit Care Med* 2019;47(10):1362–70.  
14
- 15 18. Macke C, Gralla F, Winkelmann M, et al. Increased First Pass Success with C-MAC  
16 Videolaryngoscopy in Prehospital Endotracheal Intubation-A Randomized Controlled Trial.  
17 *J Clin Med Res [Internet]* 2020;9(9). Available from: <http://dx.doi.org/10.3390/jcm9092719>  
18
- 19 19. Yeatts DJ, Dutton RP, Hu PF, et al. Effect of video laryngoscopy on trauma patient survival:  
20 a randomized controlled trial. *J Trauma Acute Care Surg* 2013;75(2):212–9.  
21
- 22 20. Ahmadi K, Ebrahimi M, Hashemian AM, Sarshar S, Rahimi-Movaghar V. GlideScope Video  
23 Laryngoscope for Difficult Intubation in Emergency Patients: a Quasi-Randomized  
24 Controlled Trial. *Acta Med Iran* 2015;53(12):738–42.  
25
- 26 21. Driver BE, Prekker ME, Moore JC, Schick AL, Reardon RF, Miner JR. Direct Versus Video  
27 Laryngoscopy Using the C-MAC for Tracheal Intubation in the Emergency Department, a  
28 Randomized Controlled Trial. *Acad Emerg Med* 2016;23(4):433–9.  
29
- 30 22. Goksu E, Kilic T, Yildiz G, Unal A, Kartal M. Comparison of the C-MAC video laryngoscope  
31 to the Macintosh laryngoscope for intubation of blunt trauma patients in the ED. *Turk J*  
32 *Emerg Med* 2016;16(2):53–6.  
33
- 34 23. Kim JW, Park SO, Lee KR, et al. Video laryngoscopy vs. direct laryngoscopy: Which should  
35 be chosen for endotracheal intubation during cardiopulmonary resuscitation? A prospective  
36 randomized controlled study of experienced intubators. *Resuscitation* 2016;105:196–202.  
37
- 38 24. Sulser S, Ubmann D, Schlaepfer M, et al. C-MAC videolaryngoscope compared with direct  
39 laryngoscopy for rapid sequence intubation in an emergency department: A randomised  
40 clinical trial. *Eur J Anaesthesiol* 2016;33(12):943–8.  
41
- 42 25. Sanguanwit P, Yuksen C, Laowattana N. Direct Versus Video Laryngoscopy in Emergency  
43 Intubation: A Randomized Control Trial Study. *Bull Emerg Trauma* 2021;9(3):118–24.  
44
- 45 26. Griesdale DEG, Chau A, Isac G, et al. Video-laryngoscopy versus direct laryngoscopy in  
46 critically ill patients: a pilot randomized trial. *Can J Anaesth* 2012;59(11):1032–9.  
47
- 48 27. Silverberg MJ, Li N, Acquah SO, Kory PD. Comparison of video laryngoscopy versus direct  
49 laryngoscopy during urgent endotracheal intubation: a randomized controlled trial. *Crit Care*  
50 *Med* 2015;43(3):636–41.  
51
- 52 28. Janz DR, Semler MW, Lentz RJ, et al. Randomized Trial of Video Laryngoscopy for  
53 Endotracheal Intubation of Critically Ill Adults. *Crit Care Med* 2016;44(11):1980–7.  
54
- 55 29. Abdelgalel EF, Mowafy SMS. Comparison between Glidescope, Airtraq and Macintosh  
56  
57  
58  
59

- laryngoscopy for emergency endotracheal intubation in intensive care unit: Randomized controlled trial. *Egyptian Journal of Anaesthesia* 2018;34(4):123–8.
30. Gao Y-X, Song Y-B, Gu Z-J, et al. Video versus direct laryngoscopy on successful first-pass endotracheal intubation in ICU patients. *World J Emerg Med* 2018;9(2):99–104.
  31. Dey S, Pradhan D, Saikia P, Bhattacharyya P, Khandelwal H, Adarsha KN. Intubation in the Intensive Care Unit: C-MAC video laryngoscope versus Macintosh laryngoscope. *Med Intensiva* 2020;44(3):135–41.
  32. Dharanindra. A comparative study of King Vision video laryngoscope and Macintosh laryngoscope for intubation in the ICU. *Indian J Crit Care Med* 2020;24 Suppl (2):S38–9.
  33. Lascarrou JB, Boissrame-Helms J, Bailly A, et al. Video Laryngoscopy vs Direct Laryngoscopy on Successful First-Pass Orotracheal Intubation Among ICU Patients: A Randomized Clinical Trial. *JAMA* 2017;317(5):483–93.
  34. Chan A-W, Tetzlaff JM, Gøtzsche PC, et al. SPIRIT 2013 explanation and elaboration: guidance for protocols of clinical trials. *BMJ* 2013;346:e7586.
  35. Cormack RS, Lehane J. Difficult tracheal intubation in obstetrics. *Anaesthesia* 1984;39(11):1105–11.
  36. Knaus WA, Draper EA, Wagner DP, Zimmerman JE. APACHE II: a severity of disease classification system. *Crit Care Med* 1985;13(10):818–29.
  37. Teasdale G, Jennett B. Assessment of coma and impaired consciousness. A practical scale. *Lancet* 1974;2(7872):81–4.
  38. Driver BE, Prekker ME, Klein LR, et al. Effect of Use of a Bougie vs Endotracheal Tube and Stylet on First-Attempt Intubation Success Among Patients With Difficult Airways Undergoing Emergency Intubation: A Randomized Clinical Trial. *JAMA* 2018;319(21):2179–89.
  39. Driver BE, Semler MW, Self WH, et al. Effect of Use of a Bougie vs Endotracheal Tube With Stylet on Successful Intubation on the First Attempt Among Critically Ill Patients Undergoing Tracheal Intubation: A Randomized Clinical Trial. *JAMA* 2021;326(24):2488–97.
  40. RStudio Team. RStudio: Integrated Development for R [Internet]. 2015; Available from: <http://www.rstudio.com>
  41. E9 Statistical Principles for Clinical Trials [Internet]. Food and Drug Administration. [cited 2021 Jun 9]; Available from: <https://www.fda.gov/media/71336/download>
  42. Statistical Principles for Clinical Trials [Internet]. European Medicines Agency. [cited 2021 Jun 9]; Available from: [https://www.ema.europa.eu/en/documents/scientific-guideline/ich-e-9-statistical-principles-clinical-trials-step-5\\_en.pdf](https://www.ema.europa.eu/en/documents/scientific-guideline/ich-e-9-statistical-principles-clinical-trials-step-5_en.pdf)
  43. Recommendations for the Conduct, Reporting, Editing, and Publication of Scholarly Work in Medical Journals [Internet]. International Committee of Medical Journal Editors. [cited 2021 Jun 9]; Available from: <http://www.icmje.org/icmje-recommendations.pdf>

- 1
- 2
- 3
- 4 44. Schandelmaier S, Briel M, Varadhan R, et al. Development of the Instrument to assess the
- 5 Credibility of Effect Modification Analyses (ICEMAN) in randomized controlled trials and
- 6 meta-analyses. *CMAJ* 2020;192(32):E901–6.
- 7
- 8 45. Janz DR, Semler MW, Joffe AM, et al. A Multicenter Randomized Trial of a Checklist for
- 9 Endotracheal Intubation of Critically Ill Adults. *Chest* 2018;153(4):816–24.
- 10
- 11 46. Semler MW, Janz DR, Lentz RJ, et al. Randomized Trial of Apneic Oxygenation during
- 12 Endotracheal Intubation of the Critically Ill. *Am J Respir Crit Care Med* 2016;193(3):273–80.
- 13
- 14 47. Casey JD, Janz DR, Russell DW, et al. Bag-Mask Ventilation during Tracheal Intubation of
- 15 Critically Ill Adults. *N Engl J Med* 2019;380(9):811–21.
- 16
- 17 48. Janz DR, Casey JD, Semler MW, et al. Effect of a fluid bolus on cardiovascular collapse
- 18 among critically ill adults undergoing tracheal intubation (PrePARE): a randomised
- 19 controlled trial. *Lancet Respir Med* 2019;7(12):1039–47.
- 20
- 21 49. Semler MW, Janz DR, Russell DW, et al. A Multicenter, Randomized Trial of Ramped
- 22 Position vs Sniffing Position During Endotracheal Intubation of Critically Ill Adults. *Chest*
- 23 2017;152(4):712–22.
- 24
- 25 50. Russell DW, Casey JD, Gibbs KW, et al. Effect of Fluid Bolus Administration on
- 26 Cardiovascular Collapse Among Critically Ill Patients Undergoing Tracheal Intubation: A
- 27 Randomized Clinical Trial. *JAMA* 2022;328(3):270–9.
- 28
- 29
- 30
- 31
- 32
- 33
- 34
- 35
- 36
- 37
- 38
- 39
- 40
- 41
- 42
- 43
- 44
- 45
- 46
- 47
- 48
- 49
- 50
- 51
- 52
- 53
- 54
- 55
- 56
- 57
- 58
- 59
- 60

1  
2  
3 **Figure Legend**  
4

5 **Figure 1.** Schedule of enrollment, interventions, and assessments in the DEVICE trial. TI,  
6 tracheal intubation.  
7  
8  
9  
10  
11  
12  
13  
14  
15  
16  
17  
18  
19  
20  
21  
22  
23  
24  
25  
26  
27  
28  
29  
30  
31  
32  
33  
34  
35  
36  
37  
38  
39  
40  
41  
42  
43  
44  
45  
46  
47  
48  
49  
50  
51  
52  
53  
54  
55  
56  
57  
58  
59  
60

For peer review only

|                                 | STUDY PERIOD           |                      |                 |    |                  |                   |                                       |
|---------------------------------|------------------------|----------------------|-----------------|----|------------------|-------------------|---------------------------------------|
|                                 | Eligibility Screen     | Randomize & Allocate | Peri-Procedural |    |                  |                   | Final Outcome Assessment              |
| TIMEPOINT                       | Decision to perform TI | Prior to TI          | Induction       | TI | 0-2 min after TI | 0-48 hrs after TI | Discharge or 28 days after enrollment |
| <b>ENROLLMENT:</b>              |                        |                      |                 |    |                  |                   |                                       |
| Eligibility Screen              | X                      |                      |                 |    |                  |                   |                                       |
| Allocation                      |                        | X                    |                 |    |                  |                   |                                       |
| <b>INTERVENTIONS:</b>           |                        |                      |                 |    |                  |                   |                                       |
| Video Laryngoscope              |                        |                      |                 | X  |                  |                   |                                       |
| Direct Laryngoscope             |                        |                      |                 | X  |                  |                   |                                       |
| Screening for Contraindications | X                      | X                    | X               | X  |                  |                   |                                       |
| <b>ASSESSMENTS:</b>             |                        |                      |                 |    |                  |                   |                                       |
| Baseline Variables              | X                      | X                    |                 |    |                  |                   |                                       |
| Peri-Procedural Variables       |                        | X                    | X               | X  | X                |                   |                                       |
| Clinical Outcomes               |                        |                      |                 |    |                  | X                 | X                                     |

1  
2  
3 **Supplementary file to:**  
4  
5  
6

7 **DirEct Versus Video LaryngosCope (DEVICE): Protocol and statistical analysis plan for a**  
8 **randomized clinical trial**  
9  
10

11  
12  
13  
14  
15  
16 Table of Contents

- 17  
18 1. SPIRIT 2013 Checklist  
19  
20 2. List of DEVICE Investigators  
21  
22 3. Definition of ICU-Free Days (ICU-FDs)  
23  
24 4. Definition of Ventilator-Free Days (VFDs)  
25  
26 5. Safety Monitoring and Adverse Events  
27  
28 5.1. Adverse Event Definitions  
29  
30 5.2. Monitoring for Adverse Events  
31  
32 5.3. Recording and Reporting Adverse Events  
33  
34 5.4. Clinical Outcomes that may be Exempt from Adverse Event Recording and  
35 Reporting  
36  
37 5.5. Unanticipated Problems involving Risks to Subjects or Others  
38  
39  
40  
41 6. Patient Privacy and Data Storage  
42  
43 7. Plan for Communication of Protocol Changes  
44  
45  
46  
47  
48  
49  
50  
51  
52  
53  
54  
55  
56  
57  
58  
59  
60

## 1. SPIRIT 2013 Checklist

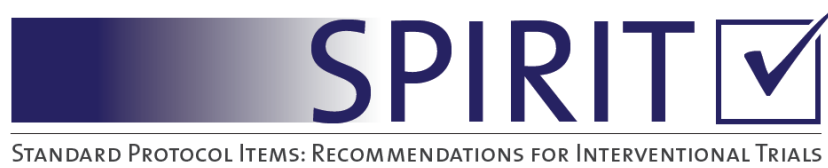

SPIRIT 2013 Checklist: Recommended items to address in a clinical trial protocol and related documents\*

| Section/item                      | Item No | Description                                                                                                                                                                                                                                                                              | Addressed on page number        |
|-----------------------------------|---------|------------------------------------------------------------------------------------------------------------------------------------------------------------------------------------------------------------------------------------------------------------------------------------------|---------------------------------|
| <b>Administrative information</b> |         |                                                                                                                                                                                                                                                                                          |                                 |
| Title                             | 1       | Descriptive title identifying the study design, population, interventions, and, if applicable, trial acronym                                                                                                                                                                             | ___1___                         |
| Trial registration                | 2a      | Trial identifier and registry name. If not yet registered, name of intended registry                                                                                                                                                                                                     | ___6___                         |
|                                   | 2b      | All items from the World Health Organization Trial Registration Data Set                                                                                                                                                                                                                 | ___n/a___                       |
| Protocol version                  | 3       | Date and version identifier                                                                                                                                                                                                                                                              | ___n/a___                       |
| Funding                           | 4       | Sources and types of financial, material, and other support                                                                                                                                                                                                                              | ___29___                        |
| Roles and responsibilities        | 5a      | Names, affiliations, and roles of protocol contributors                                                                                                                                                                                                                                  | ___1-2, Supplement section 2___ |
|                                   | 5b      | Name and contact information for the trial sponsor                                                                                                                                                                                                                                       | ___29___                        |
|                                   | 5c      | Role of study sponsor and funders, if any, in study design; collection, management, analysis, and interpretation of data; writing of the report; and the decision to submit the report for publication, including whether they will have ultimate authority over any of these activities | ___29___                        |
|                                   | 5d      | Composition, roles, and responsibilities of the coordinating centre, steering committee, endpoint adjudication committee, data management team, and other individuals or groups overseeing the trial, if applicable (see Item 21a for data monitoring committee)                         | ___11, 18, 29___                |
| <b>Introduction</b>               |         |                                                                                                                                                                                                                                                                                          |                                 |

|    |                                                           |     |                                                                                                                                                                                                                                                                                                                                                                                |
|----|-----------------------------------------------------------|-----|--------------------------------------------------------------------------------------------------------------------------------------------------------------------------------------------------------------------------------------------------------------------------------------------------------------------------------------------------------------------------------|
| 1  |                                                           |     |                                                                                                                                                                                                                                                                                                                                                                                |
| 2  |                                                           |     |                                                                                                                                                                                                                                                                                                                                                                                |
| 3  | Background and rationale                                  | 6a  | Description of research question and justification for undertaking the trial, including summary of relevant studies (published and unpublished) examining benefits and harms for each intervention                                                                                                                                                                             |
| 4  |                                                           |     | _____8-10_____                                                                                                                                                                                                                                                                                                                                                                 |
| 5  |                                                           |     |                                                                                                                                                                                                                                                                                                                                                                                |
| 6  |                                                           |     |                                                                                                                                                                                                                                                                                                                                                                                |
| 7  |                                                           |     |                                                                                                                                                                                                                                                                                                                                                                                |
| 8  |                                                           | 6b  | Explanation for choice of comparators                                                                                                                                                                                                                                                                                                                                          |
| 9  |                                                           |     | _____8_____                                                                                                                                                                                                                                                                                                                                                                    |
| 10 | Objectives                                                | 7   | Specific objectives or hypotheses                                                                                                                                                                                                                                                                                                                                              |
| 11 |                                                           |     | _____10_____                                                                                                                                                                                                                                                                                                                                                                   |
| 12 | Trial design                                              | 8   | Description of trial design including type of trial (eg, parallel group, crossover, factorial, single group), allocation ratio, and framework (eg, superiority, equivalence, noninferiority, exploratory)                                                                                                                                                                      |
| 13 |                                                           |     | _____11_____                                                                                                                                                                                                                                                                                                                                                                   |
| 14 |                                                           |     |                                                                                                                                                                                                                                                                                                                                                                                |
| 15 |                                                           |     |                                                                                                                                                                                                                                                                                                                                                                                |
| 16 |                                                           |     |                                                                                                                                                                                                                                                                                                                                                                                |
| 17 |                                                           |     |                                                                                                                                                                                                                                                                                                                                                                                |
| 18 | <b>Methods: Participants, interventions, and outcomes</b> |     |                                                                                                                                                                                                                                                                                                                                                                                |
| 19 | Study setting                                             | 9   | Description of study settings (eg, community clinic, academic hospital) and list of countries where data will be collected. Reference to where list of study sites can be obtained                                                                                                                                                                                             |
| 20 |                                                           |     | _____5, 23_____                                                                                                                                                                                                                                                                                                                                                                |
| 21 |                                                           |     |                                                                                                                                                                                                                                                                                                                                                                                |
| 22 |                                                           |     |                                                                                                                                                                                                                                                                                                                                                                                |
| 23 |                                                           |     |                                                                                                                                                                                                                                                                                                                                                                                |
| 24 |                                                           |     |                                                                                                                                                                                                                                                                                                                                                                                |
| 25 | Eligibility criteria                                      | 10  | Inclusion and exclusion criteria for participants. If applicable, eligibility criteria for study centres and individuals who will perform the interventions (eg, surgeons, psychotherapists)                                                                                                                                                                                   |
| 26 |                                                           |     | _____11_____                                                                                                                                                                                                                                                                                                                                                                   |
| 27 |                                                           |     |                                                                                                                                                                                                                                                                                                                                                                                |
| 28 |                                                           |     |                                                                                                                                                                                                                                                                                                                                                                                |
| 29 | Interventions                                             | 11a | Interventions for each group with sufficient detail to allow replication, including how and when they will be administered                                                                                                                                                                                                                                                     |
| 30 |                                                           |     | _____12-13_____                                                                                                                                                                                                                                                                                                                                                                |
| 31 |                                                           |     |                                                                                                                                                                                                                                                                                                                                                                                |
| 32 |                                                           | 11b | Criteria for discontinuing or modifying allocated interventions for a given trial participant (eg, drug dose change in response to harms, participant request, or improving/worsening disease)                                                                                                                                                                                 |
| 33 |                                                           |     | _____13_____                                                                                                                                                                                                                                                                                                                                                                   |
| 34 |                                                           |     |                                                                                                                                                                                                                                                                                                                                                                                |
| 35 |                                                           |     |                                                                                                                                                                                                                                                                                                                                                                                |
| 36 |                                                           | 11c | Strategies to improve adherence to intervention protocols, and any procedures for monitoring adherence (eg, drug tablet return, laboratory tests)                                                                                                                                                                                                                              |
| 37 |                                                           |     | _____13-14_____                                                                                                                                                                                                                                                                                                                                                                |
| 38 |                                                           |     |                                                                                                                                                                                                                                                                                                                                                                                |
| 39 |                                                           | 11d | Relevant concomitant care and interventions that are permitted or prohibited during the trial                                                                                                                                                                                                                                                                                  |
| 40 |                                                           |     | _____13_____                                                                                                                                                                                                                                                                                                                                                                   |
| 41 |                                                           |     |                                                                                                                                                                                                                                                                                                                                                                                |
| 42 | Outcomes                                                  | 12  | Primary, secondary, and other outcomes, including the specific measurement variable (eg, systolic blood pressure), analysis metric (eg, change from baseline, final value, time to event), method of aggregation (eg, median, proportion), and time point for each outcome. Explanation of the clinical relevance of chosen efficacy and harm outcomes is strongly recommended |
| 43 |                                                           |     | _____16-18_____                                                                                                                                                                                                                                                                                                                                                                |
| 44 |                                                           |     |                                                                                                                                                                                                                                                                                                                                                                                |
| 45 |                                                           |     |                                                                                                                                                                                                                                                                                                                                                                                |
| 46 |                                                           |     |                                                                                                                                                                                                                                                                                                                                                                                |
| 47 |                                                           |     |                                                                                                                                                                                                                                                                                                                                                                                |
| 48 |                                                           |     |                                                                                                                                                                                                                                                                                                                                                                                |
| 49 |                                                           |     |                                                                                                                                                                                                                                                                                                                                                                                |
| 50 | Participant timeline                                      | 13  | Time schedule of enrolment, interventions (including any run-ins and washouts), assessments, and visits for participants. A schematic diagram is highly recommended (see Figure)                                                                                                                                                                                               |
| 51 |                                                           |     | _____30_____                                                                                                                                                                                                                                                                                                                                                                   |
| 52 |                                                           |     |                                                                                                                                                                                                                                                                                                                                                                                |
| 53 |                                                           |     |                                                                                                                                                                                                                                                                                                                                                                                |
| 54 |                                                           |     |                                                                                                                                                                                                                                                                                                                                                                                |
| 55 |                                                           |     |                                                                                                                                                                                                                                                                                                                                                                                |
| 56 |                                                           |     |                                                                                                                                                                                                                                                                                                                                                                                |
| 57 |                                                           |     |                                                                                                                                                                                                                                                                                                                                                                                |
| 58 |                                                           |     |                                                                                                                                                                                                                                                                                                                                                                                |
| 59 |                                                           |     |                                                                                                                                                                                                                                                                                                                                                                                |
| 60 |                                                           |     |                                                                                                                                                                                                                                                                                                                                                                                |



|    |             |    |                                                                                                                                                                                       |               |
|----|-------------|----|---------------------------------------------------------------------------------------------------------------------------------------------------------------------------------------|---------------|
| 1  |             |    |                                                                                                                                                                                       |               |
| 2  |             |    |                                                                                                                                                                                       |               |
| 3  | Sample size | 14 | Estimated number of participants needed to achieve study objectives and how it was determined, including clinical and statistical assumptions supporting any sample size calculations | _____18_____  |
| 4  |             |    |                                                                                                                                                                                       |               |
| 5  |             |    |                                                                                                                                                                                       |               |
| 6  |             |    |                                                                                                                                                                                       |               |
| 7  |             |    |                                                                                                                                                                                       |               |
| 8  | Recruitment | 15 | Strategies for achieving adequate participant enrolment to reach target sample size                                                                                                   | _____n/a_____ |
| 9  |             |    |                                                                                                                                                                                       |               |
| 10 |             |    |                                                                                                                                                                                       |               |

### Methods: Assignment of interventions (for controlled trials)

#### Allocation:

|    |                                  |     |                                                                                                                                                                                                                                                                                                                                                          |                 |
|----|----------------------------------|-----|----------------------------------------------------------------------------------------------------------------------------------------------------------------------------------------------------------------------------------------------------------------------------------------------------------------------------------------------------------|-----------------|
| 14 |                                  |     |                                                                                                                                                                                                                                                                                                                                                          |                 |
| 15 |                                  |     |                                                                                                                                                                                                                                                                                                                                                          |                 |
| 16 | Sequence generation              | 16a | Method of generating the allocation sequence (eg, computer-generated random numbers), and list of any factors for stratification. To reduce predictability of a random sequence, details of any planned restriction (eg, blocking) should be provided in a separate document that is unavailable to those who enrol participants or assign interventions | _____11-12_____ |
| 17 |                                  |     |                                                                                                                                                                                                                                                                                                                                                          |                 |
| 18 |                                  |     |                                                                                                                                                                                                                                                                                                                                                          |                 |
| 19 |                                  |     |                                                                                                                                                                                                                                                                                                                                                          |                 |
| 20 |                                  |     |                                                                                                                                                                                                                                                                                                                                                          |                 |
| 21 |                                  |     |                                                                                                                                                                                                                                                                                                                                                          |                 |
| 22 |                                  |     |                                                                                                                                                                                                                                                                                                                                                          |                 |
| 23 |                                  |     |                                                                                                                                                                                                                                                                                                                                                          |                 |
| 24 | Allocation concealment mechanism | 16b | Mechanism of implementing the allocation sequence (eg, central telephone; sequentially numbered, opaque, sealed envelopes), describing any steps to conceal the sequence until interventions are assigned                                                                                                                                                | _____11-12_____ |
| 25 |                                  |     |                                                                                                                                                                                                                                                                                                                                                          |                 |
| 26 |                                  |     |                                                                                                                                                                                                                                                                                                                                                          |                 |
| 27 |                                  |     |                                                                                                                                                                                                                                                                                                                                                          |                 |
| 28 |                                  |     |                                                                                                                                                                                                                                                                                                                                                          |                 |
| 29 | Implementation                   | 16c | Who will generate the allocation sequence, who will enrol participants, and who will assign participants to interventions                                                                                                                                                                                                                                | _____11-12_____ |
| 30 |                                  |     |                                                                                                                                                                                                                                                                                                                                                          |                 |
| 31 |                                  |     |                                                                                                                                                                                                                                                                                                                                                          |                 |
| 32 | Blinding (masking)               | 17a | Who will be blinded after assignment to interventions (eg, trial participants, care providers, outcome assessors, data analysts), and how                                                                                                                                                                                                                | _____12_____    |
| 33 |                                  |     |                                                                                                                                                                                                                                                                                                                                                          |                 |
| 34 |                                  |     |                                                                                                                                                                                                                                                                                                                                                          |                 |
| 35 |                                  |     |                                                                                                                                                                                                                                                                                                                                                          |                 |
| 36 |                                  | 17b | If blinded, circumstances under which unblinding is permissible, and procedure for revealing a participant's allocated intervention during the trial                                                                                                                                                                                                     | _____n/a_____   |
| 37 |                                  |     |                                                                                                                                                                                                                                                                                                                                                          |                 |
| 38 |                                  |     |                                                                                                                                                                                                                                                                                                                                                          |                 |
| 39 |                                  |     |                                                                                                                                                                                                                                                                                                                                                          |                 |

### Methods: Data collection, management, and analysis

|    |                         |     |                                                                                                                                                                                                                                                                                                                                                                                                              |                      |
|----|-------------------------|-----|--------------------------------------------------------------------------------------------------------------------------------------------------------------------------------------------------------------------------------------------------------------------------------------------------------------------------------------------------------------------------------------------------------------|----------------------|
| 40 |                         |     |                                                                                                                                                                                                                                                                                                                                                                                                              |                      |
| 41 |                         |     |                                                                                                                                                                                                                                                                                                                                                                                                              |                      |
| 42 | Data collection methods | 18a | Plans for assessment and collection of outcome, baseline, and other trial data, including any related processes to promote data quality (eg, duplicate measurements, training of assessors) and a description of study instruments (eg, questionnaires, laboratory tests) along with their reliability and validity, if known. Reference to where data collection forms can be found, if not in the protocol | _____13-18_____      |
| 43 |                         |     |                                                                                                                                                                                                                                                                                                                                                                                                              |                      |
| 44 |                         |     |                                                                                                                                                                                                                                                                                                                                                                                                              |                      |
| 45 |                         |     |                                                                                                                                                                                                                                                                                                                                                                                                              |                      |
| 46 |                         |     |                                                                                                                                                                                                                                                                                                                                                                                                              |                      |
| 47 |                         |     |                                                                                                                                                                                                                                                                                                                                                                                                              |                      |
| 48 |                         |     |                                                                                                                                                                                                                                                                                                                                                                                                              |                      |
| 49 |                         |     |                                                                                                                                                                                                                                                                                                                                                                                                              |                      |
| 50 |                         | 18b | Plans to promote participant retention and complete follow-up, including list of any outcome data to be collected for participants who discontinue or deviate from intervention protocols                                                                                                                                                                                                                    | _____13, 16, 19_____ |
| 51 |                         |     |                                                                                                                                                                                                                                                                                                                                                                                                              |                      |
| 52 |                         |     |                                                                                                                                                                                                                                                                                                                                                                                                              |                      |
| 53 |                         |     |                                                                                                                                                                                                                                                                                                                                                                                                              |                      |
| 54 |                         |     |                                                                                                                                                                                                                                                                                                                                                                                                              |                      |
| 55 |                         |     |                                                                                                                                                                                                                                                                                                                                                                                                              |                      |
| 56 |                         |     |                                                                                                                                                                                                                                                                                                                                                                                                              |                      |
| 57 |                         |     |                                                                                                                                                                                                                                                                                                                                                                                                              |                      |
| 58 |                         |     |                                                                                                                                                                                                                                                                                                                                                                                                              |                      |
| 59 |                         |     |                                                                                                                                                                                                                                                                                                                                                                                                              |                      |

|    |             |     |                                                                |
|----|-------------|-----|----------------------------------------------------------------|
| 1  |             |     |                                                                |
| 2  |             |     |                                                                |
| 3  |             |     |                                                                |
| 4  | Data        | 19  | Plans for data entry, coding, security, and storage, including |
| 5  | management  |     | any related processes to promote data quality (eg, double      |
| 6  |             |     | data entry; range checks for data values). Reference to        |
| 7  |             |     | where details of data management procedures can be             |
| 8  |             |     | found, if not in the protocol                                  |
| 9  |             |     | _____35_____                                                   |
| 10 | Statistical | 20a | Statistical methods for analysing primary and secondary        |
| 11 | methods     |     | outcomes. Reference to where other details of the statistical  |
| 12 |             |     | analysis plan can be found, if not in the protocol             |
| 13 |             |     | _____19-22_____                                                |
| 14 |             | 20b | Methods for any additional analyses (eg, subgroup and          |
| 15 |             |     | adjusted analyses)                                             |
| 16 |             |     | _____21, 23_____                                               |
| 17 |             | 20c | Definition of analysis population relating to protocol         |
| 18 |             |     | non-adherence (eg, as randomised analysis), and any            |
| 19 |             |     | statistical methods to handle missing data (eg, multiple       |
| 20 |             |     | imputation)                                                    |
| 21 |             |     | _____23_____                                                   |

### Methods: Monitoring

|    |            |     |                                                                  |
|----|------------|-----|------------------------------------------------------------------|
| 22 |            |     |                                                                  |
| 23 | Data       | 21a | Composition of data monitoring committee (DMC); summary          |
| 24 | monitoring |     | of its role and reporting structure; statement of whether it is  |
| 25 |            |     | independent from the sponsor and competing interests; and        |
| 26 |            |     | reference to where further details about its charter can be      |
| 27 |            |     | found, if not in the protocol. Alternatively, an explanation of  |
| 28 |            |     | why a DMC is not needed                                          |
| 29 |            |     | _____18_____                                                     |
| 30 |            | 21b | Description of any interim analyses and stopping guidelines,     |
| 31 |            |     | including who will have access to these interim results and      |
| 32 |            |     | make the final decision to terminate the trial                   |
| 33 |            |     | _____18_____                                                     |
| 34 | Harms      | 22  | Plans for collecting, assessing, reporting, and managing         |
| 35 |            |     | solicited and spontaneously reported adverse events and          |
| 36 |            |     | other unintended effects of trial interventions or trial conduct |
| 37 |            |     | ___Supplement                                                    |
| 38 |            |     | section 5_____                                                   |
| 39 | Auditing   | 23  | Frequency and procedures for auditing trial conduct, if any,     |
| 40 |            |     | and whether the process will be independent from                 |
| 41 |            |     | investigators and the sponsor                                    |
| 42 |            |     | _____18-19_____                                                  |

### Ethics and dissemination

|    |                 |     |                                                              |
|----|-----------------|-----|--------------------------------------------------------------|
| 43 |                 |     |                                                              |
| 44 |                 |     |                                                              |
| 45 | Research        | 24  | Plans for seeking research ethics committee/institutional    |
| 46 | ethics approval |     | review board (REC/IRB) approval                              |
| 47 |                 |     | _____23-24_____                                              |
| 48 | Protocol        | 25  | Plans for communicating important protocol modifications     |
| 49 | amendments      |     | (eg, changes to eligibility criteria, outcomes, analyses) to |
| 50 |                 |     | relevant parties (eg, investigators, REC/IRBs, trial         |
| 51 |                 |     | participants, trial registries, journals, regulators)        |
| 52 |                 |     | _____Supplement                                              |
| 53 |                 |     | section 7_____                                               |
| 54 | Consent or      | 26a | Who will obtain informed consent or assent from potential    |
| 55 | assent          |     | trial participants or authorised surrogates, and how (see    |
| 56 |                 |     | Item 32)                                                     |
| 57 |                 |     | _____23-25_____                                              |

|    |                               |     |                                                                                                                                                                                                                                                                                     |
|----|-------------------------------|-----|-------------------------------------------------------------------------------------------------------------------------------------------------------------------------------------------------------------------------------------------------------------------------------------|
| 1  |                               |     |                                                                                                                                                                                                                                                                                     |
| 2  |                               |     |                                                                                                                                                                                                                                                                                     |
| 3  |                               |     |                                                                                                                                                                                                                                                                                     |
| 4  |                               | 26b | Additional consent provisions for collection and use of participant data and biological specimens in ancillary studies, if applicable                                                                                                                                               |
| 5  |                               |     | ___Supplement section 6_____                                                                                                                                                                                                                                                        |
| 6  |                               |     |                                                                                                                                                                                                                                                                                     |
| 7  | Confidentiality               | 27  | How personal information about potential and enrolled participants will be collected, shared, and maintained in order to protect confidentiality before, during, and after the trial                                                                                                |
| 8  |                               |     | ___Supplement section 6_____                                                                                                                                                                                                                                                        |
| 9  |                               |     |                                                                                                                                                                                                                                                                                     |
| 10 |                               |     |                                                                                                                                                                                                                                                                                     |
| 11 |                               |     |                                                                                                                                                                                                                                                                                     |
| 12 | Declaration of interests      | 28  | Financial and other competing interests for principal investigators for the overall trial and each study site                                                                                                                                                                       |
| 13 |                               |     | ___29_____                                                                                                                                                                                                                                                                          |
| 14 |                               |     |                                                                                                                                                                                                                                                                                     |
| 15 | Access to data                | 29  | Statement of who will have access to the final trial dataset, and disclosure of contractual agreements that limit such access for investigators                                                                                                                                     |
| 16 |                               |     | ___Supplement section 6_____                                                                                                                                                                                                                                                        |
| 17 |                               |     |                                                                                                                                                                                                                                                                                     |
| 18 |                               |     |                                                                                                                                                                                                                                                                                     |
| 19 | Ancillary and post-trial care | 30  | Provisions, if any, for ancillary and post-trial care, and for compensation to those who suffer harm from trial participation                                                                                                                                                       |
| 20 |                               |     | ___n/a_____                                                                                                                                                                                                                                                                         |
| 21 |                               |     |                                                                                                                                                                                                                                                                                     |
| 22 |                               |     |                                                                                                                                                                                                                                                                                     |
| 23 | Dissemination policy          | 31a | Plans for investigators and sponsor to communicate trial results to participants, healthcare professionals, the public, and other relevant groups (eg, via publication, reporting in results databases, or other data sharing arrangements), including any publication restrictions |
| 24 |                               |     | ___10, 25_____                                                                                                                                                                                                                                                                      |
| 25 |                               |     |                                                                                                                                                                                                                                                                                     |
| 26 |                               |     |                                                                                                                                                                                                                                                                                     |
| 27 |                               |     |                                                                                                                                                                                                                                                                                     |
| 28 |                               |     |                                                                                                                                                                                                                                                                                     |
| 29 |                               |     |                                                                                                                                                                                                                                                                                     |
| 30 |                               | 31b | Authorship eligibility guidelines and any intended use of professional writers                                                                                                                                                                                                      |
| 31 |                               |     | ___n/a_____                                                                                                                                                                                                                                                                         |
| 32 |                               |     |                                                                                                                                                                                                                                                                                     |
| 33 |                               | 31c | Plans, if any, for granting public access to the full protocol, participant-level dataset, and statistical code                                                                                                                                                                     |
| 34 |                               |     | ___Supplement section 6_____                                                                                                                                                                                                                                                        |
| 35 |                               |     |                                                                                                                                                                                                                                                                                     |
| 36 |                               |     |                                                                                                                                                                                                                                                                                     |
| 37 | <b>Appendices</b>             |     |                                                                                                                                                                                                                                                                                     |
| 38 | Informed consent materials    | 32  | Model consent form and other related documentation given to participants and authorised surrogates                                                                                                                                                                                  |
| 39 |                               |     | ___n/a_____                                                                                                                                                                                                                                                                         |
| 40 |                               |     |                                                                                                                                                                                                                                                                                     |
| 41 |                               |     |                                                                                                                                                                                                                                                                                     |
| 42 | Biological specimens          | 33  | Plans for collection, laboratory evaluation, and storage of biological specimens for genetic or molecular analysis in the current trial and for future use in ancillary studies, if applicable                                                                                      |
| 43 |                               |     | ___n/a_____                                                                                                                                                                                                                                                                         |
| 44 |                               |     |                                                                                                                                                                                                                                                                                     |
| 45 |                               |     |                                                                                                                                                                                                                                                                                     |
| 46 |                               |     |                                                                                                                                                                                                                                                                                     |

---

\*It is strongly recommended that this checklist be read in conjunction with the SPIRIT 2013 Explanation & Elaboration for important clarification on the items. Amendments to the protocol should be tracked and dated. The SPIRIT checklist is copyrighted by the SPIRIT Group under the Creative Commons [“Attribution-NonCommercial-NoDerivs 3.0 Unported”](https://creativecommons.org/licenses/by-nc-nd/3.0/) license.

## 2. List of DEVICE Investigators

Vanderbilt University Medical Center– Jonathan D. Casey, MD, MSc\*; Matthew W. Semler, MD, MSc\*; Todd W. Rice, MD, MSc\*; Kevin Seitz, MD, MPH\*; Wesley Self, MD, MPH\*; Jeremy P. Walco, MD\*; Christopher Hughes, MD\*; Brant Imhoff, MS\*; Li Wang, MS\*; Jillian P. Rhoads, PhD\*; Kelsey Womack, PhD\*; Bradley D. Lloyd, RRT-ACCS\*; Christopher J. Lindsell, PhD; Colleen M. Ratcliff, BS; Christina Kampe, MA, CCRP; Edward T. Qian, MD; Jacob A. Wood BS; Margaret A. Hays RN, MSN; Liza M. Frawley BSN, RN.

Hennepin County Medical Center– Matthew E. Prekker, MD, MPH\*; Brian E. Driver, MD\*; Sydney J. Hansen, MD\*; Audrey Hendrickson, MPH; Stephen Douglas, BS; Kowsar Hurreh, BS, Leyla Taghizadeh, BA.

University of Colorado School of Medicine– Daniel Resnick-Ault, MD\*; Jill J. Bastman, BSN, RN\*; Adit A. Ginde, MD, MPH\*; Cori Withers, BS.

University of Alabama at Birmingham Medical Center and Heersink School of Medicine– Derek W. Russell, MD\*; Sheetal Gandotra, MD\*; Sarah W. Robison, MD\*; Micah R. Whitson, MD\*; David B. Page, MD, MSPH\*; Anna Altz-Stamm RN, BSN, CCRN; Mary Clay Boone RN, BSN; Robert B. Johnson RRT; Geri-Anne Warman RN, BSN; Jennifer J. Oswald RN, BSN; Jerrod Isbell RRT; Anne Merrill Mason RN, BSN; Gina White RN, BSN; Drew Robinson MD; Jordan Minish MD; Reed Lahaye MD; Edwin Gunn MD; Abdulhakim Tlimat MD; Tyler Greathouse DO; Luis L. Tatem MD; Christopher Richardson MD; Austin Oslock MD; John Patrick Simmons MD; Morgan Locy MD, PhD; Ryan Goetz MD; Daniel Sullivan MD; Ross Schumacher MD; Melissa Jordan MD; Jonathan Kalehoff MD; Anneka Hutton MD; Daniel Kelmenson MD; Meena Sridhar MD; Ahmed Salem MD; Aneesah B. Jaumally MD; Ishan Lalani MD, MPH; William S. Stigler

1  
2  
3 MD; Phillip J. O'Reilly MD; Donna S. Harris RN, BSN; Cara E. Porter RN, ADN; Sonya Hardy,  
4 MA; Puneet Aulakh MD; Joseph B. Barney MD; Joseph Chiles III MD; Bryan Garcia MD; Aditya  
5 Kotecha MD; Takudzwa Mkorombindo MD; Peter Morris MD; Kinner Patel MD; R. Chad Wade  
6 MD; Carla Copeland MD; Michael C. Kurz, MD, MS.  
7  
8  
9

10  
11  
12  
13 Denver Health Medical Center– Stacy A. Trent, MD, MSPH\*; Ivor S. Douglas, MD\*; Carol Lynn  
14 Lyle, PA-C, MPH.  
15  
16  
17

18  
19  
20 Wake Forest School of Medicine– Kevin W. Gibbs, MD\*; Jessica A. Palakshappa, MD\*; John P.  
21 Gaillard, MD\*; Madeline Hicks, BS; Haileigh Henson, RN; Savanna Burgess, RN; Benjamin  
22 Richards, RN; Matthew Strong, RN; Charles Yarbrough, RN; Paul Finkelstein, RN.  
23  
24  
25

26  
27  
28 Ochsner Health– Derek J. Vonderhaar, MD\*; Alyssa Espinera, MD\*.  
29  
30

31  
32  
33 University of Washington Harborview Medical Center– Andrew J. Latimer, MD\*; Steven H.  
34 Mitchell, MD\*; Christopher R. Barnes, MD\*; Aaron Joffe, DO\*; Layla A. Anderson, BS; Thomas  
35 C. Paulsen, BS; Itay Bentov, MD.  
36  
37  
38

39  
40  
41 Baylor. Scott. and White Health, Temple– Shekhar A. Ghamande, MD\*; Heath D. White, DO,  
42 MS\*; Alfredo Vazquez, MD; Juan Sanchez, MD; Conner Moslander, MD; Alejandro C. Arroliga,  
43 MD; Zenia Sattar, MD; Tasnim Lat, DO.  
44  
45  
46

47  
48  
49 Duke University School of Medicine– Vijay Krishnamoorthy, MD, PhD\*; J. Taylor Herbert, MD,  
50 PhD\*.  
51  
52  
53

54  
55  
56 Brooke Army Medical Center– Brit J. Long, MD\*; Steven G. Schauer, DO, MS\*.  
57  
58  
59

1  
2  
3  
4  
5 \* Denotes an author listed on the byline  
6  
7  
8  
9  
10  
11  
12  
13  
14  
15  
16  
17  
18  
19  
20  
21  
22  
23  
24  
25  
26  
27  
28  
29  
30  
31  
32  
33  
34  
35  
36  
37  
38  
39  
40  
41  
42  
43  
44  
45  
46  
47  
48  
49  
50  
51  
52  
53  
54  
55  
56  
57  
58  
59  
60

### 3. Definition of ICU-Free Days (ICU-FDs)

ICU-FDs are defined as the number of days, between enrollment and 28 days after enrollment, in which the patient is alive and not admitted to an intensive care unit service after the patient's final discharge from the intensive care unit. Patients who are never discharged from the intensive care unit receive a value of 0. Patients who die before day 28 receive a value of 0. For patients who return to an ICU and are subsequently discharged prior to day 28, ICU-free days are counted from the date of final ICU discharge. All data are censored hospital discharge or 28 days, whichever comes first.

#### 4. Definition of Ventilator-Free Days (VFDs)

VFDs are defined as the number of days, between enrollment and 28 days after enrollment, during which the patient is alive and with unassisted breathing and remains free of assisted breathing. If a patient returns to assisted breathing and subsequently achieves unassisted breathing prior to day 28, VFD will be counted from the end of the last period of assisted breathing to day 28. If the patient is receiving assisted ventilation at day 28 or dies prior to day 28, VFDs are 0. If a patient is discharged while receiving assisted ventilation, VFDs are 0. All data is censored hospital discharge or 28 days, whichever comes first.



## 5. Safety Monitoring and Adverse Events

Assuring patient safety is an essential component of this protocol. Use of a video laryngoscope and use of a direct laryngoscope are both standard-of-care interventions that have been used in clinical practice for decades with an established safety profile. However, any trial conducted during a high-risk, time-sensitive procedure like tracheal intubation of critically ill patients raises unique safety considerations. This protocol addresses these considerations through:

1. Exclusion criteria designed to prevent enrollment of patients likely to experience adverse events from intubation using a video laryngoscope or intubation using a direct laryngoscope;
2. Systematic collection of outcomes relevant to the safety of intubation using a video laryngoscope or intubation using a direct laryngoscope;
3. Structured monitoring, assessment, recording, and reporting of adverse events.

### 5.1. Adverse Event Definitions

*Adverse Event* – An adverse event will be defined as any untoward or unfavorable medical occurrence in a human subject temporally associated with the subject's participation in the research, whether or not considered related to the subject's participation in the research. Any adverse event occurring during the research will be classified according to the following characteristics:

- *Seriousness* – An adverse event will be considered “serious” if it:
  - Results in death;
  - Is life-threatening (defined as placing the patient at immediate risk of death);
  - Results in inpatient hospitalization or prolongation of existing hospitalization;
  - Results in a persistent or significant disability or incapacity;
  - Results in a congenital anomaly or birth defect; or

- 1  
2  
3  
4  
5  
6  
7  
8  
9  
10  
11  
12  
13  
14  
15  
16  
17  
18  
19  
20  
21  
22  
23  
24  
25  
26  
27  
28  
29  
30  
31  
32  
33  
34  
35  
36  
37  
38  
39  
40  
41  
42  
43  
44  
45  
46  
47  
48  
49  
50  
51  
52  
53  
54  
55  
56  
57  
58  
59  
60
- Based upon appropriate medical judgment, may jeopardize the patient's health and may require medical or surgical intervention to prevent one of the other outcomes listed in this definition.
  - *Unexpectedness* – An adverse event will be considered “unexpected” if the nature, severity, or frequency is neither consistent with:
    - The known or foreseeable risk of adverse events associated with the procedures involved in the research that are described in the protocol-related documents, such as the IRB-approved research protocol; nor
    - The expected natural progression of any underlying disease, disorder, or condition of the subject experiencing the adverse event and the subject's predisposing risk factor profile for the adverse event.
  - *Relatedness* – The strength of the relationship of an adverse event to a study intervention or study procedure will be defined as follows:
    - Definitely Related: The adverse event follows (1) a reasonable, temporal sequence from a study procedure AND (2) cannot be explained by the known characteristics of the patient's clinical state or other therapies AND (3) evaluation of the patient's clinical state indicates to the investigator that the experience is definitely related to study procedures.
    - Probably or Possibly Related: The adverse event meets some but not all of the above criteria for “Definitely Related”.
    - Probably Not Related: The adverse event occurred while the patient was on the study but can reasonably be explained by the known characteristics of the patient's clinical state or other therapies.
    - Definitely Not Related: The adverse event is definitely produced by the patient's clinical state or by other modes of therapy administered to the patient.

- Uncertain Relationship: The adverse event does not fit in any of the above categories.

## 5.2. Monitoring for Adverse Events

The time interval during which patients will be monitored for the occurrence of adverse events begins at randomization and ends at the first of hospital discharge or 28 days. Adverse events occurring before randomization or after hospital discharge or 28 days will not be collected. The lead investigator at each enrolling site will have primary responsibility for overseeing the monitoring, assessment, and reporting of adverse events. Site study personnel will evaluate for the occurrence of adverse events by manual review of the electronic health record and by communication with treating clinicians. Site study personnel will evaluate for the occurrence of adverse events by manual review of the electronic health record at two time points. The first will occur as close as feasible to 24 hours after randomization during initial data collection. The second will occur at the first of hospital discharge or 28 days after enrollment during final data collection. Study personnel at each site will also communicate regularly with the treating clinicians who perform tracheal intubation in the study environments between enrollment and 28 days after enrollment to solicit information about any potential adverse events. If study personnel at a site identify a potential adverse event, the lead investigator at the site will be immediately notified. The lead investigator at the site will assess the seriousness, unexpectedness, and relatedness of the potential adverse event. With assistance as needed from the coordinating center and the trial primary investigator, the lead investigator at the site will determine whether the event qualifies for recording and reporting.

## 5.3. Recording and Reporting Adverse Events

The following types of adverse events will be recorded and reported:

- Adverse events that are Serious and Definitely Related, Probably or Possibly Related, or of Uncertain Relationship.
- Adverse events that are Unexpected and Definitely Related, Probably or Possibly Related, or of Uncertain Relationship.

Adverse events that do not meet the above criteria will not be recorded or reported. Adverse events that the lead investigator at a site assesses to meet the above criteria for recording and reporting will be entered into the adverse event electronic case report form in the trial database. The lead investigator at the site will record an assessment of each characteristic for the adverse event, including seriousness, unexpectedness, and relatedness. For any adverse event that is **serious AND unexpected**, and definitely related, probably or possibly related, or of uncertain relationship, the lead investigator at the site will report the adverse event to the coordinating center and the trial primary investigators **within 24 hours** of becoming aware of the adverse event. For any other adverse event requiring recording and reporting, the lead investigator at the site will report the adverse event to the coordinating center and the trial primary investigators **within 72 hours** of becoming aware of the adverse event. The coordinating center and the trial principal investigator will coordinate with the lead investigator at the site to obtain information about the adverse event regarding each characteristic for the adverse event, including seriousness, expectedness, and relatedness. The lead investigator at the site will be responsible for making final determinations regarding seriousness and unexpectedness. The coordinating center and trial principal investigator will be responsible for making final determinations regarding relatedness.

For adverse events that meet the above criteria for recording and reporting, the coordinating center will notify the DSMB, the IRB, and the sponsor in accordance with the following reporting plan:

| Characteristics of the Adverse Event                                                                                                                  | Reporting Period                                                                    |
|-------------------------------------------------------------------------------------------------------------------------------------------------------|-------------------------------------------------------------------------------------|
| Fatal or life-threatening (and therefore serious), unexpected, and definitely related, probably or possibility related, or of uncertain relationship. | Report to the DSMB, IRB, and sponsor within 7 days after notification of the event. |
| Serious but non-fatal and non-life-threatening, unexpected, and definitely related, probably or possibly related, or of uncertain relationship.       | Report to DSMB, IRB, and sponsor within 15 days of notification of the event.       |
| All other adverse events meeting criteria for recording and reporting.                                                                                | Report to DSMB in regularly scheduled DSMB safety reports.                          |

#### 5.4. Clinical Outcomes that may be Exempt from Adverse Event Recording and Reporting

In this study of critically ill patients at high risk for death and other adverse outcomes due to their underlying critical illness, clinical outcomes, including death and organ dysfunction, will be systematically collected and analyzed for all patients. The primary, secondary, safety, and exploratory outcomes will be recorded and reported as clinical outcomes and not as adverse events unless treating clinicians or site investigators believe the event is Definitely Related or Probably or Possibly Related to the study intervention or study procedures. This approach – considering death and organ dysfunction as clinical outcomes rather than adverse events and systemically collecting these clinical outcomes for analysis – is common in ICU trials. This approach ensures comprehensive data on death and organ dysfunction for all patients, rather than relying on sporadic adverse event reporting to identify these important events. The following events are examples of study-specific clinical outcomes that would not be recorded

1  
2  
3 and reported as adverse events unless treating clinicians or site investigators believe the event  
4 was Definitely Related or Probably or Possibly Related to the study intervention or study  
5  
6 procedures:

- 7  
8  
9
- 10 ● Death (all deaths occurring prior to hospital discharge or 28 days will be recorded);
  - 11 ● Organ dysfunction
  - 12 ○ Pulmonary – hypoxemia, aspiration, acute hypoxemic respiratory failure,  
13 pneumothorax
  - 14 ○ Cardiac – hypotension, shock, vasopressor receipt, cardiac arrest;
  - 15
  - 16 ● Duration of mechanical ventilation;
  - 17 ● Duration of ICU admission;
  - 18 ● Duration of hospitalization
  - 19
  - 20
  - 21
  - 22
  - 23
  - 24
  - 25
  - 26
  - 27
  - 28

29 Note: A study-specific clinical outcome may also qualify as an adverse event meeting criteria for  
30 recording and reporting. For example, an injury to the teeth that the investigator considers  
31 Definitely Related to randomization to use of a direct laryngoscope would be both recorded as a  
32 study-specific clinical outcome and recorded and reported as a Serious and Definitely Related  
33 adverse event.  
34  
35  
36  
37  
38  
39  
40  
41

## 42 **5.5. Unanticipated Problems Involving Risks to Subjects or Others**

43

44 Investigators must also report Unanticipated Problems Involving Risks to Subjects or Others  
45 (“Unanticipated Problems”), regardless of severity, associated with study procedures within 24  
46 hours of the site investigator becoming aware of the Unanticipated Problem. An Unanticipated  
47 Problem is defined as any incident, experience, or outcome that meets all of the following  
48 criteria:  
49  
50  
51  
52  
53  
54

- 1
- 2
- 3 ● Unexpected (in terms of nature, severity, or frequency) given (a) the research
- 4 procedures that are described in the protocol-related documents, such as the
- 5 IRB-approved research protocol; and (b) the characteristics of the subject population
- 6 being studied; AND
- 7
- 8
- 9
- 10
- 11 ● Definitely Related or Probably or Possibly Related to participation in the research (as
- 12 defined above in the section on characteristics of adverse events); AND
- 13
- 14
- 15
- 16 ● Suggests that the research places subjects or others at a greater risk of harm (including
- 17 physical, psychological, economic, or social harm) than was previously known or
- 18 recognized.
- 19
- 20
- 21

22 If any study personnel at a site become aware of an event that may represent an Unanticipated  
23 problem, they will immediately contact the lead investigator for the site. The lead investigator at  
24 the site will assess whether the event represents an Unanticipated Problem by applying the  
25 criteria described above. If the lead investigator at the site determines that the event represents  
26 an Unanticipated Problem, the lead investigator at the site investigator will record the  
27 Unanticipated Problem in the Unanticipated Problem electronic case report form in the trial  
28 database. The lead investigator at the site will then communicate that an Unanticipated Problem  
29 has occurred to the coordinating center and the trial principal investigator within 24 hours of the  
30 lead investigator at the site becoming aware of the Unanticipated Problem. The coordinating  
31 center and principal investigator will coordinate with the lead investigator at the site to obtain  
32 information about the Unanticipated Problem. The coordinating center will report the  
33 Unanticipated Problem to the DSMB, IRB, and sponsor within 15 days of becoming aware of the  
34 Unanticipated Problem.

35

36

37

38

39

40

41

42

43

44

45

46

47

48

49

50

51

52

53

54

55

56

57

58

59

60

## 6. Patient Privacy and Data Storage

At no time during this study, its analysis, or its publication, will patient identities be revealed in any manner. The minimum necessary data containing patient or provider identities or other private healthcare information (PHI), is collected. All subjects are assigned a unique study ID number for tracking purposes. Data collected from the medical record is entered into the secure online database REDCap. The PHI required to accurately collect clinical and outcomes data is available only to investigators at the site at which the subject is enrolled, and this data is shared only in completely de-identified form with the coordinating center via the secure online database REDCap. Hard copies of the data collection sheet completed at the time of the airway management event are stored in a locked room until after the completion of enrollment and data cleaning. Once data are verified and the database is locked, all hard copies of data collection forms will be destroyed. The de-identified dataset housed in REDCap will be accessed by the coordinating center for reporting the results of this trial. All data will be maintained in the secure online database REDCap until the time of study publication. At the time of publication, all PHI at local centers will be expunged and only the de-identified version of the database will be retained. Potential future use of de-identified data generated in the course of this study by the coordinating center and other participating sites is allowed and will be governed by mutual data sharing use agreements.



## 7. Plan for Communication of Protocol Changes

Any changes to the trial protocol (e.g., changes to eligibility criteria, outcomes, analyses) will be implemented via a new version of the full trial protocol, tracked with the date of the update and the version number of the trial protocol. A list summarizing the changes made with each protocol revision will be included at the end of each protocol. The updated protocol will be sent to the relevant IRBs for tracking prior to implementation of the protocol change. At the time of publication, the original trial protocol, and the final trial protocol, including the summary of changes made with each protocol change, will be included in the supplementary material for publication.

# BMJ Open

## DirEct Versus VIdeo LaryngosCope (DEVICE): Protocol and statistical analysis plan for a randomized clinical trial in critically ill adults undergoing emergency tracheal intubation

|                               |                                                                                                                                                                                                                                                                                                                                                                                                                                                                                                                                                                                                                                                                                                                                                                                                                                                                                                                                                                                                                                                                                                                                                                                                                                                                                                                                                                                                                                                                                                                                                                                                                                                                                                                                                                                                                                                                                                                                                                                                                                                                                                                                                                                                                                                                                                                                            |
|-------------------------------|--------------------------------------------------------------------------------------------------------------------------------------------------------------------------------------------------------------------------------------------------------------------------------------------------------------------------------------------------------------------------------------------------------------------------------------------------------------------------------------------------------------------------------------------------------------------------------------------------------------------------------------------------------------------------------------------------------------------------------------------------------------------------------------------------------------------------------------------------------------------------------------------------------------------------------------------------------------------------------------------------------------------------------------------------------------------------------------------------------------------------------------------------------------------------------------------------------------------------------------------------------------------------------------------------------------------------------------------------------------------------------------------------------------------------------------------------------------------------------------------------------------------------------------------------------------------------------------------------------------------------------------------------------------------------------------------------------------------------------------------------------------------------------------------------------------------------------------------------------------------------------------------------------------------------------------------------------------------------------------------------------------------------------------------------------------------------------------------------------------------------------------------------------------------------------------------------------------------------------------------------------------------------------------------------------------------------------------------|
| Journal:                      | <i>BMJ Open</i>                                                                                                                                                                                                                                                                                                                                                                                                                                                                                                                                                                                                                                                                                                                                                                                                                                                                                                                                                                                                                                                                                                                                                                                                                                                                                                                                                                                                                                                                                                                                                                                                                                                                                                                                                                                                                                                                                                                                                                                                                                                                                                                                                                                                                                                                                                                            |
| Manuscript ID                 | bmjopen-2022-068978.R1                                                                                                                                                                                                                                                                                                                                                                                                                                                                                                                                                                                                                                                                                                                                                                                                                                                                                                                                                                                                                                                                                                                                                                                                                                                                                                                                                                                                                                                                                                                                                                                                                                                                                                                                                                                                                                                                                                                                                                                                                                                                                                                                                                                                                                                                                                                     |
| Article Type:                 | Protocol                                                                                                                                                                                                                                                                                                                                                                                                                                                                                                                                                                                                                                                                                                                                                                                                                                                                                                                                                                                                                                                                                                                                                                                                                                                                                                                                                                                                                                                                                                                                                                                                                                                                                                                                                                                                                                                                                                                                                                                                                                                                                                                                                                                                                                                                                                                                   |
| Date Submitted by the Author: | 12-Dec-2022                                                                                                                                                                                                                                                                                                                                                                                                                                                                                                                                                                                                                                                                                                                                                                                                                                                                                                                                                                                                                                                                                                                                                                                                                                                                                                                                                                                                                                                                                                                                                                                                                                                                                                                                                                                                                                                                                                                                                                                                                                                                                                                                                                                                                                                                                                                                |
| Complete List of Authors:     | <p>Prekker, Matthew; Hennepin County Medical Center, Department of Emergency Medicine; Hennepin County Medical Center, Department of Medicine, Division of Pulmonary, Allergy, and Critical Care Medicine</p> <p>Driver, Brian; Hennepin County Medical Center, Department of Emergency Medicine</p> <p>Trent, Stacy; Denver Health Medical Center, Department of Emergency Medicine; University of Colorado Denver School of Medicine, Department of Emergency Medicine</p> <p>Resnick-Ault, Daniel; University of Colorado Denver School of Medicine, Department of Emergency Medicine</p> <p>Seitz, Kevin; Vanderbilt University Medical Center, Division of Pulmonary, Allergy, and Critical Care Medicine</p> <p>Russell, Derek ; University of Alabama at Birmingham, Division of Pulmonary, Allergy, &amp; Critical Care Medicine; Birmingham Veteran's Affairs Medical Center, Pulmonary Section</p> <p>Gandotra, Sheetal ; University of Alabama at Birmingham, Division of Pulmonary, Allergy, &amp; Critical Care Medicine</p> <p>Gaillard, John; Atrium Health Wake Forest Baptist, Department of Emergency Medicine; Atrium Health Wake Forest Baptist, Department of Anesthesiology, Section on Critical Care</p> <p>Gibbs, Kevin ; Wake Forest School of Medicine, Department of Medicine, Section of Pulmonary, Critical Care, Allergy and Immunology</p> <p>Latimer, Andrew; University of Washington Harborview Medical Center, Emergency Medicine</p> <p>Whitson, Micah; The University of Alabama at Birmingham, Department of Emergency Medicine; The University of Alabama at Birmingham, Department of Medicine, Division of Pulmonary, Allergy &amp; Critical Care Medicine</p> <p>Ghamande, Shekhar; Baylor Scott &amp; White Medical Center, Department of Medicine, Division of Pulmonary Disease and Critical Care Medicine</p> <p>Vonderhaar, Derek; Ochsner Health, Department of Pulmonary and Critical Care Medicine</p> <p>Walco, Jeremy; Vanderbilt University Medical Center, Department of Anesthesiology</p> <p>Hansen, Sydney; Hennepin County Medical Center, Department of Emergency Medicine; Hennepin County Medical Center, Department of Medicine, Division of Pulmonary, Allergy, and Critical Care Medicine</p> <p>Douglas, Ivor S.; Denver Health Medical Center, Division of Pulmonary</p> |

|                                 |                                                                                                                                                                                                                                                                                                                                                                                                                                                                                                                                                                                                                                                                                                                                                                                                                                                                                                                                                                                                                                                                                                                                                                                                                                                                                                                                                                                                                                                                                                                                                                                                                                                                                                                                                                                                                                                                                                                                                                                                                                                                                                                                                                                                                                                                                                                                                                                                                                                                                                                                                                                                                                                                                                                                                                                                                                                                                                                                                                                                                                     |
|---------------------------------|-------------------------------------------------------------------------------------------------------------------------------------------------------------------------------------------------------------------------------------------------------------------------------------------------------------------------------------------------------------------------------------------------------------------------------------------------------------------------------------------------------------------------------------------------------------------------------------------------------------------------------------------------------------------------------------------------------------------------------------------------------------------------------------------------------------------------------------------------------------------------------------------------------------------------------------------------------------------------------------------------------------------------------------------------------------------------------------------------------------------------------------------------------------------------------------------------------------------------------------------------------------------------------------------------------------------------------------------------------------------------------------------------------------------------------------------------------------------------------------------------------------------------------------------------------------------------------------------------------------------------------------------------------------------------------------------------------------------------------------------------------------------------------------------------------------------------------------------------------------------------------------------------------------------------------------------------------------------------------------------------------------------------------------------------------------------------------------------------------------------------------------------------------------------------------------------------------------------------------------------------------------------------------------------------------------------------------------------------------------------------------------------------------------------------------------------------------------------------------------------------------------------------------------------------------------------------------------------------------------------------------------------------------------------------------------------------------------------------------------------------------------------------------------------------------------------------------------------------------------------------------------------------------------------------------------------------------------------------------------------------------------------------------------|
|                                 | <p>and Critical Care Medicine<br/>         Barnes, Christopher ; University of Washington Harborview Medical Center, Department of Anesthesiology and Critical Care Medicine<br/>         Krishnamoorthy, Vijay ; Duke University School of Medicine, Department of Anesthesiology<br/>         Bastman, Jill; University of Colorado Denver School of Medicine, Department of Emergency Medicine<br/>         Lloyd, Bradley; Vanderbilt University Medical Center, Respiratory Care<br/>         Robison, Sarah; University of Alabama at Birmingham, Department of Medicine, Division of Pulmonary, Allergy, &amp; Critical Care Medicine; Birmingham Veteran's Affairs Medical Center, Pulmonary Section<br/>         Palakshappa, Jessica; Wake Forest School of Medicine, Department of Medicine, Section of Pulmonary, Critical Care, Allergy and Immunology<br/>         Mitchell, Steven; University of Washington Harborview Medical Center, Department of Emergency Medicine<br/>         Page, David; The University of Alabama at Birmingham, Division of Pulmonary, Allergy, and Critical Care Medicine<br/>         White, Heath; Baylor Scott &amp; White Medical Center, Department of Medicine, Division of Pulmonary Disease and Critical Care Medicine<br/>         Espinera , Alyssa; Ochsner Health, Department of Pulmonary and Critical Care Medicine<br/>         Hughes, Christopher ; Vanderbilt University Medical Center, Department of Anesthesiology<br/>         Joffe, AM; University of Washington Harborview Medical Center, Department of Anesthesiology<br/>         Herbert, J. Taylor; Duke University School of Medicine, Department of Anesthesiology<br/>         Schauer, Steven; US Army Institute of Surgical Research<br/>         Long, Brit; 59th Medical Wing<br/>         Imhoff, Brant; Vanderbilt University Medical Center, Department of Biostatistics<br/>         Wang, Li; Vanderbilt University School of Medicine, Department of Biostatistics<br/>         Rhoads, Jillian; Vanderbilt Institute for Clinical and Translational Research<br/>         Womack, Kelsey; Vanderbilt Institute for Clinical and Translational Research<br/>         Janz, David; University Medical Center New Orleans, Department of Medicine, Section of Pulmonary/Critical Care Medicine and Allergy/Immunology<br/>         Self, Wesley; Vanderbilt University Medical Center, Department of Emergency Medicine; Vanderbilt Institute for Clinical and Translational Research<br/>         Rice, Todd; Vanderbilt University Medical Center, Division of Pulmonary, Allergy, and Critical Care Medicine<br/>         Ginde, Adit; University of Colorado Denver School of Medicine, Department of Emergency Medicine<br/>         Casey, Jonathan; Vanderbilt University Medical Center, Division of Pulmonary, Allergy, and Critical Care Medicine<br/>         Semler, Matthew; Vanderbilt University Medical Center, Division of Pulmonary, Allergy, and Critical Care Medicine</p> |
| <b>Primary Subject Heading</b>: | Intensive care                                                                                                                                                                                                                                                                                                                                                                                                                                                                                                                                                                                                                                                                                                                                                                                                                                                                                                                                                                                                                                                                                                                                                                                                                                                                                                                                                                                                                                                                                                                                                                                                                                                                                                                                                                                                                                                                                                                                                                                                                                                                                                                                                                                                                                                                                                                                                                                                                                                                                                                                                                                                                                                                                                                                                                                                                                                                                                                                                                                                                      |
| Secondary Subject Heading:      | Emergency medicine                                                                                                                                                                                                                                                                                                                                                                                                                                                                                                                                                                                                                                                                                                                                                                                                                                                                                                                                                                                                                                                                                                                                                                                                                                                                                                                                                                                                                                                                                                                                                                                                                                                                                                                                                                                                                                                                                                                                                                                                                                                                                                                                                                                                                                                                                                                                                                                                                                                                                                                                                                                                                                                                                                                                                                                                                                                                                                                                                                                                                  |
| Keywords:                       | Adult intensive & critical care < INTENSIVE & CRITICAL CARE, STATISTICS & RESEARCH METHODS, ACCIDENT & EMERGENCY MEDICINE                                                                                                                                                                                                                                                                                                                                                                                                                                                                                                                                                                                                                                                                                                                                                                                                                                                                                                                                                                                                                                                                                                                                                                                                                                                                                                                                                                                                                                                                                                                                                                                                                                                                                                                                                                                                                                                                                                                                                                                                                                                                                                                                                                                                                                                                                                                                                                                                                                                                                                                                                                                                                                                                                                                                                                                                                                                                                                           |

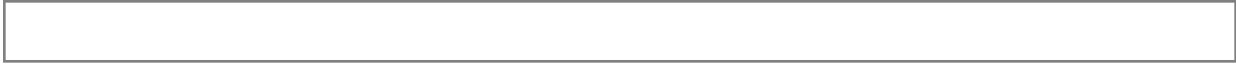

SCHOLARONE™  
Manuscripts

1  
2  
3  
4  
5  
6  
7  
8  
9  
10  
11  
12  
13  
14  
15  
16  
17  
18  
19  
20  
21  
22  
23  
24  
25  
26  
27  
28  
29  
30  
31  
32  
33  
34  
35  
36  
37  
38  
39  
40  
41  
42  
43  
44  
45  
46  
47  
48  
49  
50  
51  
52  
53  
54  
55  
56  
57  
58  
59  
60

**DirEct Versus Video LaryngosCope (DEVICE): Protocol and statistical analysis plan for a randomized clinical trial in critically ill adults undergoing emergency tracheal intubation**

Matthew E. Prekker, MD, MPH<sup>1,2</sup>; Brian E. Driver, MD<sup>2</sup>; Stacy A. Trent, MD, MSPH<sup>3,4</sup>; Daniel Resnick-Ault, MD<sup>4</sup>; Kevin P. Seitz, MD, MSc<sup>5</sup>; Derek W. Russell, MD<sup>6,7</sup>; Sheetal Gandotra, MD<sup>6</sup>; John P. Gaillard, MD<sup>8,9</sup>; Kevin W. Gibbs, MD<sup>10</sup>; Andrew J. Latimer, MD<sup>11</sup>; Micah R. Whitson, MD<sup>6,12</sup>; Shekhar A. Ghamande, MD<sup>13</sup>; Derek J. Vonderhaar, MD<sup>14</sup>; Jeremy P. Walco, MD<sup>15</sup>; Sydney J. Hansen, MD<sup>1,2</sup>; Ivor S. Douglas, MD<sup>16,17</sup>; Christopher R. Barnes, MD<sup>18</sup>; Vijay Krishnamoorthy, MD, PhD<sup>19</sup>; Jill J. Bastman, BSN, RN<sup>4</sup>; Bradley D. Lloyd, RRT-ACCS<sup>5</sup>; Sarah W. Robison, MD<sup>6,7</sup>; Jessica A. Palakshappa, MD, MS<sup>9</sup>; Steven H. Mitchell, MD<sup>11</sup>; David B. Page, MD, MSPH<sup>6</sup>; Heath D. White, DO, MS<sup>13</sup>; Alyssa Espinera, MD<sup>14</sup>; Christopher G. Hughes, MD, MSc<sup>15</sup>; Aaron Joffe, DO<sup>18</sup>; J. Taylor Herbert, MD, PhD<sup>19</sup>; LTC Steven G. Schauer, DO, MS<sup>20</sup>; Maj. Brit J. Long, MD<sup>21</sup>; Brant Imhoff, MS<sup>22</sup>; Li Wang, MS<sup>22</sup>; Jillian P. Rhoads, PhD<sup>23</sup>; Kelsey N. Womack, PhD<sup>23</sup>; David R. Janz, MD, MSc<sup>24</sup>; Wesley H. Self, MD, MPH<sup>23,25</sup>; Todd W. Rice, MD, MSc<sup>5</sup>; Adit A. Ginde, MD, MPH<sup>4</sup>; Jonathan D. Casey, MD, MSc<sup>5\*</sup>; Matthew W. Semler, MD, MSc<sup>5\*</sup>; for the DEVICE investigators and the Pragmatic Critical Care Research Group

\*denotes authors contributed equally to this work

1. Department of Medicine, Division of Pulmonary, Allergy, and Critical Care Medicine, Hennepin County Medical Center, Minneapolis, Minnesota, USA
2. Department of Emergency Medicine, Hennepin County Medical Center, Minneapolis, Minnesota, USA
3. Department of Emergency Medicine, Denver Health Medical Center, Denver, Colorado, USA
4. Department of Emergency Medicine, University of Colorado School of Medicine, Aurora, Colorado, USA

- 1  
2  
3 5. Department of Medicine, Division of Pulmonary and Critical Care Medicine, Vanderbilt  
4 University Medical Center, Nashville, Tennessee, USA
- 5  
6  
7 6. Department of Medicine, Division of Pulmonary, Allergy and Critical Care Medicine,  
8 University of Alabama at Birmingham Heersink School of Medicine, Birmingham, Alabama,  
9 USA
- 10  
11  
12 7. Pulmonary Section, Birmingham Veterans Affairs Medical Center, Birmingham, Alabama,  
13 USA
- 14  
15  
16 8. Department of Anesthesiology, Section on Critical Care, Atrium Health Wake Forest Baptist,  
17 Winston-Salem, North Carolina, USA
- 18  
19  
20 9. Department of Emergency Medicine, Atrium Health Wake Forest Baptist, Winston-Salem,  
21 North Carolina, USA
- 22  
23  
24 10. Section on Pulmonary, Critical Care, Allergy, and Immunology, Wake Forest School of  
25 Medicine, Winston-Salem, North Carolina, USA
- 26  
27  
28 11. Department of Emergency Medicine, University of Washington Harborview Medical Center,  
29 Seattle, Washington, USA
- 30  
31  
32 12. Department of Emergency Medicine, University of Alabama at Birmingham Heersink School  
33 of Medicine, Birmingham, Alabama, USA
- 34  
35  
36 13. Department of Medicine, Division of Pulmonary Disease, Critical Care, and Sleep Medicine,  
37 Baylor Scott & White Health, Temple, Texas, USA
- 38  
39  
40 14. Department of Pulmonary and Critical Care Medicine, Ochsner Health, New Orleans,  
41 Louisiana, USA
- 42  
43  
44 15. Department of Anesthesiology, Division of Anesthesia Critical Care Medicine, Vanderbilt  
45 University Medical Center, Nashville, Tennessee, USA
- 46  
47  
48 16. Division of Pulmonary, Critical Care, and Sleep Medicine, Denver Health, Denver, Colorado,  
49 USA
- 50  
51  
52  
53  
54  
55  
56  
57  
58  
59  
60

17. Department of Medicine, Division of Pulmonary and Critical Care Medicine, University of Colorado School of Medicine, Aurora, Colorado, USA
18. Department of Anesthesiology and Critical Care Medicine, University of Washington Harborview Medical Center, Seattle, Washington, USA
19. Department of Anesthesiology, Duke University School of Medicine, Durham, North Carolina, USA
20. United States Army Institute of Surgical Research, Joint Base San Antonio-Fort Sam Houston, San Antonio, Texas, USA
21. 59th Medical Wing, United States Air Force, Fort Sam Houston, San Antonio, Texas, USA
22. Department of Biostatistics, Vanderbilt University Medical Center, Nashville, Tennessee, USA
23. Vanderbilt Institute for Clinical and Translational Research, Vanderbilt University Medical Center, Nashville, Tennessee, USA
24. University Medical Center New Orleans and the Department of Medicine, Section of Pulmonary/Critical Care Medicine and Allergy/Immunology, Louisiana State University School of Medicine, New Orleans, Louisiana, USA
25. Department of Emergency Medicine, Vanderbilt University Medical Center, Nashville, Tennessee, USA

Corresponding author:

Matthew E. Prekker, MD, MPH

E-mail:

[matthew.prekker@hcmcd.org](mailto:matthew.prekker@hcmcd.org)

Address:

1  
2  
3 Department of Medicine, Mailcode G5

4  
5 701 Park Avenue South

6  
7 Minneapolis, Minnesota, USA 55415

8  
9  
10  
11 Keywords for indexing:

12  
13 Tracheal intubation, video laryngoscope, direct laryngoscope

14  
15  
16  
17 Subject Descriptor Number: 4.4 Clinical Trials in Critical Care Medicine

18  
19  
20  
21 Manuscript word count (body only): 5,075

22  
23  
24  
25 Abstract word count: 319

26  
27  
28  
29 Supplemental digital content is available for this article

30  
31  
32  
33  
34  
35  
36  
37  
38  
39  
40  
41  
42  
43  
44  
45  
46  
47  
48  
49  
50  
51  
52  
53  
54  
55  
56  
57  
58  
59  
60



**Abstract:****Introduction:**

Among critically ill patients undergoing orotracheal intubation in the emergency department (ED) or intensive care unit (ICU), failure to visualize the vocal cords and intubate the trachea on the first attempt is associated with an increased risk of complications. Two types of laryngoscopes are commonly available: direct laryngoscopes and video laryngoscopes. For critically ill adults undergoing emergency tracheal intubation, it remains uncertain whether use of a video laryngoscope increases the incidence of successful intubation on the first attempt compared with use of a direct laryngoscope.

**Methods and Analysis:**

The DirEct Versus VIdeo LaryngosCope (DEVICE) trial is a prospective, multi-center, non-blinded, randomized trial being conducted in 6 EDs and 10 ICUs in the United States. The trial plans to enroll up to 2,000 critically ill adults undergoing orotracheal intubation with a laryngoscope. Eligible patients are randomized 1:1 to the use of a video laryngoscope or a direct laryngoscope for the first intubation attempt. The primary outcome is successful intubation on the first attempt. The secondary outcome is the incidence of severe complications between induction and 2 minutes after intubation, defined as the occurrence of one or more of the following: severe hypoxemia (lowest oxygen saturation < 80%); severe hypotension (systolic blood pressure < 65 mm Hg or new or increased vasopressor administration); cardiac arrest; or death. Enrollment began on March 16, 2022 and is expected to be completed in 2023.

**Ethics and Dissemination:**

The trial protocol was approved with waiver of informed consent by the single institutional review board at Vanderbilt University Medical Center and the Human Research Protection

1  
2  
3 Office of the Department of Defense. The results will be presented at scientific conferences and  
4 submitted for publication in a peer-reviewed journal.  
5  
6  
7

### 8 9 **Trial Registration**

10  
11 ClinicalTrials.gov registration (NCT05239195) on February 14, 2022, prior to the enrollment of  
12 the first patient.  
13  
14  
15  
16  
17  
18  
19  
20  
21  
22  
23  
24  
25  
26  
27  
28  
29  
30  
31  
32  
33  
34  
35  
36  
37  
38  
39  
40  
41  
42  
43  
44  
45  
46  
47  
48  
49  
50  
51  
52  
53  
54  
55  
56  
57  
58  
59  
60

### Strengths and Limitations of this Study

- This protocol describes in detail the design and methods for a large, pragmatic trial of laryngoscope type for the emergency tracheal intubation of critically ill adults.
- Conduct in the emergency departments and intensive care units of multiple centers among operators with diverse prior experience with tracheal intubation, as well as broad patient eligibility criteria, will increase the external validity of trial results.
- Patients, clinicians, and investigators are not blinded to the study group assignment after randomization.

## Introduction

Tracheal intubation is a common procedure in the emergency department (ED) and intensive care unit (ICU). Among critically ill patients undergoing tracheal intubation, failure to intubate the trachea on the first attempt is associated with increased risk of complications, including hypoxemia, hypotension, aspiration, and cardiac arrest.<sup>1,2</sup>

Emergency tracheal intubation is typically performed in three discrete steps. First, the patient is administered medications to facilitate optimal intubating conditions (rapid sequence induction). Second, a clinician inserts a laryngoscope into the patient's mouth to visualize the vocal cords (laryngoscopy). Third, an endotracheal tube is inserted into the mouth, alongside the laryngoscope, and the tube is advanced past the vocal cords into the trachea (intubation).

The direct laryngoscope, the traditional instrument consisting of a battery-containing handle attached to a blade with a light source, has been used to visualize the vocal cords for tracheal intubation for over 100 years and remains the most commonly used device for the intubation of critically ill adults in the ED or ICU.<sup>2-5</sup> The operator uses the direct laryngoscope to displace the tongue and elevate the epiglottis to facilitate intubation of the trachea under direct visualization. Obtaining an adequate view of the larynx with a direct laryngoscope can be challenging, especially for inexperienced operators. Once a view of the larynx is obtained, passage of the endotracheal tube follows the operator's direct line-of-sight through the mouth to the vocal cords.

Over the last two decades, video laryngoscopes have provided an alternative to direct laryngoscopes for visualizing the vocal cords to facilitate tracheal intubation.<sup>6,7</sup> A camera embedded near the tip of the video laryngoscope blade transmits an image of the vocal cords to a screen that the operator can view during the procedure.<sup>8</sup> Because the camera is located near the tip of the laryngoscope blade, obtaining a view of the larynx may be easier with a video laryngoscope compared with a direct laryngoscope. However, because this view can be obtained without generating a direct line-of-sight through the mouth to the vocal cords, the

1  
2  
3 process of passing an endotracheal tube may be more difficult when using a video  
4 laryngoscope. When considering both aspects of tracheal intubation, visualizing the vocal cords  
5 and passing the endotracheal tube, it remains uncertain whether use of a video laryngoscope  
6 increases the incidence of successful intubation on the first attempt.  
7  
8  
9  
10

11           Among elective tracheal intubations in the operating room, use of video laryngoscope  
12 probably increases the incidence of successful intubation on the first attempt and decreases  
13 complications compared to use of a direct laryngoscope, supported with moderate certainty in  
14 the existing anesthesiology literature.<sup>9</sup> Extrapolating the results of randomized clinical trials  
15 conducted in the operating room to non-operating room settings is problematic because of  
16 factors related to the patient, the operator, and the environment.<sup>10,11</sup> Because tracheal intubation  
17 of critically ill adults outside of the operating room is common, complications of intubation in the  
18 ED and ICU are common, and use of a video laryngoscope during intubation in the ED and ICU  
19 has increased significantly over time,<sup>9,12</sup> understanding the effects of use of a video  
20 laryngoscope vs direct laryngoscope on successful intubation on the first attempt in these  
21 settings is a priority.  
22  
23  
24  
25  
26  
27  
28  
29  
30  
31  
32  
33

34           Previous trials randomizing patients to use of a video laryngoscope or a direct  
35 laryngoscope during emergency tracheal intubation in prehospital<sup>13–18</sup>, ED<sup>19–25</sup>, and ICU  
36 settings<sup>26–32</sup> have been small and heterogeneous and have generally suggested that while a  
37 video laryngoscope improves the view of the larynx and reduces the incidence of esophageal  
38 intubation, it may not affect the incidence of successful intubation on the first attempt. Findings  
39 were similar in the largest such trial to date, a 371-patient, multicenter, randomized clinical trial  
40 in French medical ICUs in which use of video laryngoscope failed to improve successful  
41 intubation on the first attempt (68% vs. 70%;  $p = 0.60$ ) and was associated with a greater  
42 incidence of severe peri-procedural complications in post-hoc analyses.<sup>33</sup>  
43  
44  
45  
46  
47  
48  
49  
50  
51  
52

53           The sample size of these prior trials did not provide sufficient statistical power to  
54 definitively rule out a clinically important effect of use of a video laryngoscope vs direct  
55  
56  
57  
58  
59

1  
2  
3 laryngoscope on successful intubation on the first laryngoscopy attempt or the incidence of  
4 complications. To compare the effectiveness of these two commonly used devices during this  
5 important emergency procedure, a large trial conducted across a wide variety of clinical  
6 settings, operator specialties, and levels of operator experience is required. Therefore, we  
7 designed the DirEct Versus VIdeo LaryngosCopE (DEVICE) trial to test the hypothesis that,  
8 among critically ill adults undergoing emergency tracheal intubation in the ED or ICU, use of a  
9 video laryngoscope will increase the incidence of successful intubation on the first attempt  
10 compared with use of a direct laryngoscope.  
11  
12  
13  
14  
15  
16  
17  
18  
19  
20  
21

## 22 **Methods and Analysis**

23  
24 This manuscript was written in accordance with Standard Protocol Items:  
25 Recommendations for Interventional Trials (SPIRIT) guidelines (Figure 1; supplementary file,  
26 section 1).<sup>34</sup>  
27  
28  
29  
30  
31

### 32 *Patient and Public Involvement*

33  
34 Materials used to communicate details of the study with patients and family members  
35 were developed with input from the Vanderbilt Community Advisory Council. Study authors will  
36 disseminate the results of this study online and via social media in forms suitable for public  
37 understanding.  
38  
39  
40  
41  
42  
43  
44

### 45 *Study Design*

46  
47 The DirEct Versus VIdeo LaryngosCopE (DEVICE) trial is a pragmatic, multicenter,  
48 unblinded, parallel-group, randomized trial comparing use of a video laryngoscope to use of a  
49 direct laryngoscope for the first attempt at emergency tracheal intubation among critically ill  
50 adults in the ED and ICU. The primary outcome is successful intubation on the first attempt. An  
51  
52  
53  
54  
55  
56  
57  
58  
59  
60

1  
2  
3 independent data and safety monitoring board (DSMB) is monitoring the progress and safety of  
4 the trial. Study institutions and investigators are listed in the supplementary file, section 2.  
5  
6  
7

### 8 9 *Study Population*

10  
11 The inclusion criteria for this study are:

- 12 1. Patient is located in a participating unit
- 13 2. Planned procedure is orotracheal intubation using a laryngoscope.
- 14 3. Planned operator is a clinician expected to routinely perform tracheal intubation in the  
15 participating unit.

16  
17 The exclusion criteria for the study are:

- 18 1. Patient is known to be less than 18 years old
- 19 2. Patient is known to be pregnant.
- 20 3. Patient is known to be a prisoner.
- 21 4. Immediate need for tracheal intubation precludes safe performance of study procedures.
- 22 5. Operator has determined that use of a video laryngoscope or use of a direct  
23 laryngoscope is required or contraindicated for the optimal care of the patient.

### 24 25 26 27 28 29 30 31 32 33 34 35 36 37 38 *Randomization and Treatment Allocation*

39  
40 Patients are randomized in a 1:1 ratio to undergo intubation using a video laryngoscope  
41 or using a direct laryngoscope for the first attempt in permuted blocks of variable size, stratified  
42 by study site. Study-group assignments are generated using a computerized randomization  
43 sequence, placed in sequentially numbered opaque envelopes, and distributed to enrolling  
44 sites. Before opening the envelope, the operator determines that the patient meets eligibility  
45 criteria, records the predicted difficulty of intubation (“easy”, “moderate”, or “difficult”) and  
46 selects the blade shape the operator plans to use if the patient is randomized to the video  
47 laryngoscope group (“hyperangulated” or “non-hyperangulated / standard geometry”). The  
48  
49  
50  
51  
52  
53  
54  
55  
56  
57  
58  
59  
60

operator or delegate then opens the envelope. Patients are enrolled once the envelope is opened to reveal the study group assignment. After enrollment and randomization, patients, treating clinicians, and study personnel are not blinded to study group assignment.

### *Study Interventions*

#### *Video Laryngoscope Group*

For patients assigned to the video laryngoscope group, operators are instructed to use a video laryngoscope on the first laryngoscopy attempt. A video laryngoscope is defined as a laryngoscope with a camera and a video screen. Trial protocol does not dictate the brand of video laryngoscope or the geometry of the laryngoscope blade (e.g. hyperangulated vs. non-hyperangulated), but these details will be recorded. Operators are encouraged, but not required, to view the video screen during laryngoscopy (“indirect laryngoscopy”) and tracheal intubation.

#### *Direct Laryngoscope Group*

For patients assigned to the direct laryngoscope group, operators are instructed to use a direct laryngoscope on the first laryngoscopy attempt. A direct laryngoscope is defined as a laryngoscope without a camera and a video screen. Trial protocol does not dictate the brand of direct laryngoscope or the geometry of the laryngoscope blade (e.g. curved [Macintosh] vs. straight [Miller]), but these details will be recorded.

#### *Co-Interventions and Subsequent Attempts at Laryngoscopy and Intubation*

Study group assignment determines only the type of laryngoscope (video vs direct) used on the first laryngoscopy attempt. If determined to be required to ensure optimal care of the patient, treating clinicians may use any device at any time, regardless of study group assignment. Cases in which clinicians use a laryngoscope discordant with randomized assignment on the first intubation attempt will be documented and tracked. All aspects of the



1  
2  
3 intubation procedure, except the type of laryngoscope used on the first attempt, are at the  
4 discretion of treating clinicians, including selection of sedative and neuromuscular blocking  
5 medications, patient positioning, approach to pre-oxygenation, use of a bougie or a stylet, and  
6 endotracheal tube size. Best practices in tracheal intubation will be encouraged according to  
7 clinical protocols at the study sites. The trial intervention ends after the first attempt at  
8 laryngoscopy. If the first attempt is unsuccessful, the operator may use any method of intubation  
9 on subsequent intubation attempts, including use of a direct laryngoscope in the video  
10 laryngoscope group or use of a video laryngoscope in the direct laryngoscope group. The type  
11 of laryngoscope used during the initial and final laryngoscopy attempt will be collected and  
12 reported.  
13  
14  
15  
16  
17  
18  
19  
20  
21  
22  
23  
24  
25

#### 26 *Data Collection*

27  
28 A trained observer, not directly involved with the intubation procedure, collects data for  
29 key peri-procedural outcomes. These outcomes include successful intubation on the first  
30 attempt, time interval between laryngoscopy and successful intubation, the oxygen saturation  
31 and systolic blood pressure at induction, the lowest oxygen saturation and systolic blood  
32 pressure between induction and 2 minutes after successful intubation, and new or increased  
33 vasopressor administration between induction and 2 minutes after successful intubation.  
34  
35 Observers may be clinical personnel on the enrolling unit (e.g., physician, nurse, or pharmacist)  
36 or research study personnel.  
37  
38  
39  
40  
41  
42  
43  
44

45 Immediately following the intubation procedure, the operator completes a paper data  
46 collection form to record the approach to preoxygenation, oxygenation and ventilation between  
47 induction and laryngoscopy, the brand of laryngoscope used, the blade shape, the Cormack-  
48 Lehane grade of laryngeal view<sup>35</sup>, use of the video screen to visualize the larynx (if applicable),  
49 use of a bougie or a stylet, reasons for failure to intubate on the first attempt (if applicable),  
50 intubation approaches on subsequent attempts, difficult airway characteristics observed before  
51  
52  
53  
54  
55  
56  
57  
58  
59  
60

1  
2  
3 or during the procedure (facial trauma, small mouth opening, limited neck mobility, cervical  
4 collar, large neck, obesity, fluids obscuring view of vocal cords, upper airway obstruction or  
5 edema), and complications of intubation (witnessed pulmonary aspiration, esophageal  
6 intubation, injury to airways, injury to teeth, cardiac arrest between induction and 2 minutes  
7 following intubation). The diagnosis of esophageal intubation is made by the operator based on  
8 the presence of any clinical sign including visual inspection, capnography, or absence of breath  
9 sounds or chest rise. Operators also record their specialty, training level, and estimates of the  
10 number of previous intubations they have performed and the number of previous intubations  
11 they have performed using a direct laryngoscope.  
12  
13  
14  
15  
16  
17  
18  
19  
20  
21

22 Study personnel at each site review the medical record to collect data on baseline  
23 patient characteristics, pre- and post-laryngoscopy management, and clinical outcomes at 28  
24 days after enrollment.  
25  
26  
27  
28  
29

30 The following variables are collected:  
31

- 32  
33 1. Baseline: Age, sex, height, weight, race, ethnicity, Acute Physiology and Chronic Health  
34 Evaluation II (APACHE II) score<sup>36</sup>, active medical problems at the time of enrollment,  
35 comorbidities, indication for intubation, vasopressor receipt in the hour prior to  
36 enrollment, highest FIO<sub>2</sub> in the hour prior to enrollment, lowest SpO<sub>2</sub>/FIO<sub>2</sub> (or PaO<sub>2</sub>/FIO<sub>2</sub>)  
37 ratio in the hour prior to enrollment, pre-procedural Glasgow Coma Scale (GCS) score<sup>37</sup>,  
38 oxygen delivery device at enrollment, assessment of the likelihood of a difficult  
39 intubation, presence of difficult airway characteristics (limited mouth opening, small  
40 mandible, large tongue, short neck, large neck circumference, limited anatomic neck  
41 mobility, cervical immobilization due to trauma, obesity), operator's level of training and  
42 specialty, operator's prior intubation experience.  
43  
44  
45  
46  
47  
48  
49  
50  
51  
52  
53  
54 2. Peri-procedural: Lowest SpO<sub>2</sub> from enrollment to induction, approach to and duration of  
55 pre-oxygenation, time of sedative administration, sedative agent and dose administered,  
56  
57  
58  
59  
60

1  
2  
3 neuromuscular blocking agent and dose administered, SpO<sub>2</sub> and systolic blood pressure  
4 at the time of induction, approach to oxygen administration and ventilation between  
5 induction and the first attempt at laryngoscopy, time of start of first laryngoscopy attempt,  
6 laryngoscope used on first attempt (model, blade size, blade shape), use of video screen  
7 (if applicable) on the first laryngoscopy attempt, best Cormack-Lehane grade of view<sup>35</sup>  
8 on the first laryngoscopy attempt, presence of body fluid obstructing view of the larynx,  
9 presence of upper airway obstruction or edema, number of intubation attempts (number  
10 of times the laryngoscope entered the mouth, number of times the bougie entered mouth  
11 [if applicable], number of times the endotracheal tube entered the mouth), reason for  
12 failure of the first intubation attempt (if applicable), procedural adjustments made for the  
13 final intubation attempt, esophageal intubation, injury to teeth, operator-reported  
14 pulmonary aspiration between induction and intubation, time of successful tracheal  
15 intubation, endotracheal tube size, lowest SpO<sub>2</sub> from induction until 2 minutes after  
16 intubation, lowest systolic blood pressure from induction until 2 minutes after intubation,  
17 new or increased vasopressor administration from induction until 2 minutes after  
18 intubation, cardiac arrest from induction until 2 minutes after intubation not resulting in  
19 death within 1 hour of induction, cardiac arrest from induction until 2 minutes after  
20 intubation resulting in death within 1 hour of induction.

- 21  
22  
23  
24  
25  
26  
27  
28  
29  
30  
31  
32  
33  
34  
35  
36  
37  
38  
39  
40  
41 3. 24 hours after enrollment: new pneumothorax detected in the first 24 hours after  
42 induction, vasopressor receipt at 24 hours after induction, SpO<sub>2</sub> at 24 hours after  
43 induction, FIO<sub>2</sub> at 24 hours after induction, positive end-expiratory pressure (PEEP) at  
44 24 hours after induction, systolic blood pressure at 24 hours after induction.  
45  
46  
47  
48  
49 4. In-Hospital Outcomes: Ventilator-free days in the first 28 days, ICU-free days in the first  
50 28 days, and in-hospital mortality at 28 days. Definitions for ICU-free days and ventilator-  
51 free days are provided in the supplementary file, sections 3 and 4.  
52  
53  
54  
55  
56  
57  
58  
59  
60

### *Primary Outcome*

The primary outcome is successful intubation on the first attempt. Successful intubation on the first attempt is defined as placement of an endotracheal tube in the trachea following a single insertion of a laryngoscope blade into the mouth and *either* a single insertion of an endotracheal tube into the mouth *or* a single insertion of a bougie into the mouth followed by a single insertion of an endotracheal tube into the mouth.

Data for the assessment of the primary outcome are collected by a trained independent observer using a structured data collection form that records the number of insertions of the laryngoscope blade, bougie (if used), and endotracheal tube into the patient's mouth. In the event that data from the independent observer are missing, data from the operator's self-report of successful intubation on the first attempt will be used.

### *Secondary Outcome*

The secondary outcome is the incidence of severe complications occurring between induction and 2 minutes following successful intubation. Severe complications are defined as one or more of the following:

- Severe hypoxemia (lowest oxygen saturation measured by pulse oximetry < 80%);
- Severe hypotension (systolic blood pressure < 65 mm Hg or new or increased vasopressor administration);
- Cardiac arrest not resulting in death
- Cardiac arrest resulting in death

Cardiac arrest will be considered to have resulted in death if a patient who experienced cardiac arrest between induction and 2 minutes after intubation died within the 1 hour following intubation.

### *Exploratory Outcomes*

Exploratory procedural outcomes are as follows:

- Duration of laryngoscopy and tracheal intubation. This is defined as the interval (in seconds) between the first insertion of a laryngoscope blade into the mouth and the final placement of an endotracheal tube or tracheostomy tube in the trachea.
- Number of laryngoscopy attempts
- Number of attempts to cannulate the trachea with a bougie or endotracheal tube
- Successful intubation on the first attempt without a severe complication
- Reason for failure to intubate the trachea on the first attempt, which include:
  - Inadequate view of the larynx
  - Inability to intubate the trachea with an endotracheal tube
  - Inability to cannulate the trachea with a bougie
  - Attempt aborted due to a change in patient condition (e.g. worsened hypoxemia, hypotension, bradycardia, vomiting, bleeding)
  - Technical failure of the laryngoscope (e.g. battery, light source, camera, screen)
  - Other
- Operator-reported aspiration

Exploratory safety outcomes are as follows:

- Esophageal intubation
- Injury to the teeth

Exploratory clinical outcomes are as follows:

- ICU-free days in the first 28 days
- Ventilator-free days in the first 28 days
- 28-day all-cause in-hospital mortality

### *Sample Size Estimation*

The minimum clinically important difference in successful intubation on the first attempt that would be needed to justify routine use of a video laryngoscope rather than a direct laryngoscope in the ED and ICU is uncertain. The current trial is designed to detect a 5% absolute difference between groups in the incidence of successful intubation on the first attempt. An absolute difference of 5% in successful intubation on the first attempt is similar to or smaller than the difference used in the design of prior airway management trials and is considered by airway management experts to be clinically meaningful.<sup>21,28,38,39</sup> Assuming (1) an incidence of successful intubation on the first attempt of 80% in the direct laryngoscope group, (2) 90% statistical power, (3) a two-sided alpha of 0.05, and (4) enrollment at 16 sites with an intra-cluster correlation for the primary outcome of 0.05, we calculated that detecting a 5% absolute increase in the incidence of successful intubation on the first attempt would require enrollment of 1,920 patients (960 per group). Anticipating missing data for up to 4% of enrolled patients, we will plan to enroll a total of 2,000 patients (1,000 per group).

### *Data and Safety Monitoring Board (DSMB) and Interim Analysis*

A DSMB composed of experts with backgrounds in emergency medicine, pulmonary and critical care medicine, anesthesiology, bioethics, and biostatistics has overseen the design of the trial and is monitoring its conduct. The DSMB will review a single interim analysis prepared by the study biostatistician at the anticipated halfway point of the trial, after enrollment of 1,000 patients. The stopping boundary for efficacy was pre-specified as a P-value of 0.001 or less, using a chi-square test, for the difference in the incidence of the primary outcome between groups. This conservative Haybittle–Peto boundary was selected to allow the final analysis to be performed using an unchanged level of significance ( $P < 0.05$ ). The DSMB retains the authority to stop the trial at any point, request additional data or interim analyses, or request modifications of the study protocol to protect patient safety. Trial safety monitoring and handling of adverse

1  
2  
3 events are described in detail in the supplementary file, section 5. Patient privacy and data  
4 storage details are listed in the supplementary file, section 6.  
5  
6  
7

### 8 9 *Statistical Analysis Principles*

10  
11 Analyses will be conducted following reproducible research principles using R (R  
12 Foundation for Statistical Computing, Vienna, Austria).<sup>40</sup> We will present summary tabulations  
13 by treatment group. For categorical variables, the number and proportion of patients will be  
14 presented. For continuous variables, the mean and standard deviation or median and  
15 interquartile range will be presented, as appropriate.  
16  
17  
18  
19  
20  
21

22 We will analyze a single pre-specified primary outcome and a single pre-specified  
23 secondary outcome using a chi-square test. Consistent with recommendations of the Food and  
24 Drug Administration<sup>41</sup> and the European Medicines Agency<sup>42</sup>, each will be tested using a two-  
25 sided P value with a significance level of 0.05 with contextual information provided via effect  
26 size and 95% confidence intervals. The primary analysis will occur in an intent-to-treat fashion  
27 among all patients randomized, excluding only those patients whose data was withdrawn from  
28 the study. For all other analyses except safety analyses, emphasis will be placed on the  
29 estimate of effect size with 95% confidence intervals, as recommended by the *International*  
30 *Committee of Medical Journal Editors*<sup>43</sup>, and no corrections for multiple comparisons will be  
31 performed.  
32  
33  
34  
35  
36  
37  
38  
39  
40  
41  
42  
43  
44  
45  
46  
47  
48  
49  
50  
51  
52  
53  
54  
55  
56  
57  
58  
59  
60

### *Main Analysis of the Primary Outcome*

The main analysis will be an unadjusted, intention-to-treat comparison of successful intubation on the first attempt between patients randomized to the video laryngoscope group and patients randomized to the direct laryngoscope group, using a chi-square test. The difference in proportions, the associated 95% confidence interval, and a p value for the primary outcome will be presented.

### *Secondary Analyses of the Primary Outcome*

#### *Multivariable modeling to account for covariates*

To account for relevant covariates, we will develop a generalized linear mixed effects model using a logit link function with the primary outcome as the dependent variable, study site as a random effect, and fixed effects of study group and the following pre-specified baseline covariates: age, sex, body-mass index, operator experience quantified as the operator's total number of prior intubations, and location of intubation (ED vs ICU). All continuous variables will be modeled assuming a nonlinear relationship to the outcome using restricted cubic splines with between 3 and 5 knots.



### *Effect Modification*

We will examine whether pre-specified baseline variables modify the effect of study group assignment (video laryngoscope vs direct laryngoscope) on the primary outcome using a formal test of statistical interaction in a generalized linear mixed effects model with the primary outcome as the dependent variable, study site as a random effect, and fixed effects of study group, the pre-specified proposed effect modifier, and the interaction between the two. For categorical variables, we will present the odds ratio and 95% confidence intervals within each pre-specified subgroup. Continuous variables will not be dichotomized for analysis of effect modification but may be dichotomized for data presentation. In accordance with the Instrument for assessing the Credibility of Effect Modification Analyses (ICEMAN) recommendations<sup>44</sup>, we have prespecified the following limited number of baseline variables as potential effect modifiers and the hypothesized direction of effect modification for each:

1. Patient location (ED vs ICU). We hypothesize that patient location will not modify the effect of study group assignment on the primary outcome.
2. Traumatic injury (Yes vs No). We hypothesize that traumatic injury will modify the effect of study group assignment on the primary outcome, with a greater increase in the incidence of successful intubation on the first attempt with use of a video laryngoscope compared with a direct laryngoscope among patients with traumatic injury compared to patients without traumatic injury.
3. Body mass index (kg/m<sup>2</sup>). We hypothesize that body mass index will modify the effect of study group assignment on the primary outcome, with a greater increase in the incidence of successful intubation on the first attempt with use of a video laryngoscope compared with a direct laryngoscope among patients with higher body mass index as compared to patients with lower body mass index. This hypothesis of effect modification is supported by a non-significant trend toward effect modification in a meta-analysis of multiple prior randomized trials.<sup>9</sup>

- 1  
2  
3  
4  
5  
6  
7  
8  
9  
10  
11  
12  
13  
14  
15  
16  
17  
18  
19  
20  
21  
22  
23  
24  
25  
26  
27  
28  
29  
30  
31  
32  
33  
34  
35  
36  
37  
38  
39  
40  
41  
42  
43  
44  
45  
46  
47  
48  
49  
50  
51  
52  
53  
54  
55  
56  
57  
58  
59  
60
4. Operator's pre-enrollment assessment of the anticipated difficulty of intubation (Easy; Moderate; Difficult; Not Recorded). We hypothesize that the operator's pre-enrollment assessment will modify the effect of study group assignment on the primary outcome, with a greater increase in the incidence of successful intubation on the first attempt with use of a video laryngoscope compared with a direct laryngoscope among patients assessed as Difficult or Moderate compared to Easy. This hypothesis of effect modification is supported by significant effect modification in a meta-analysis of multiple prior randomized trials.<sup>9</sup>
  5. Operator experience at the time of enrollment.
    1. Total number of previous intubations performed by operator. We hypothesize that the total number of previous intubations performed by the operator will modify the effect of study group assignment on the primary outcome, with a greater increase in the incidence of successful intubation on the first attempt with use of a video laryngoscope compared with a direct laryngoscope among operators with fewer previous intubations compared to operators with a greater number of previous intubations. This hypothesis of effect modification is supported by significant effect modification observed in a prior randomized trial among critically ill adults, but differs from a meta-analysis including trials of intubation in the operating room that did not observe effect modification based on the operator's prior experience.<sup>9,28</sup>
    2. Proportion of previous intubations performed by the operator using a direct laryngoscope. We hypothesize that the proportion of previous intubations performed by the operator using a direct laryngoscope will modify the effect of study group assignment on the primary outcome, with a greater increase in the incidence of successful intubation on the first attempt with use of a video laryngoscope compared with a direct laryngoscope among operators with a lower

1  
2  
3 proportion of previous intubations performed by the operator using a direct  
4 laryngoscope compared to operators with a higher proportion of previous  
5 intubations performed by the operator using a direct laryngoscope.  
6  
7  
8  
9

10  
11 We will also perform an effect modification analysis for the primary outcome that includes a  
12 three-way interaction between study group, total number of previous intubations performed by  
13 the operator, and proportion of previous intubations performed by the operator using a direct  
14 laryngoscope.  
15  
16  
17  
18  
19

### 20 21 22 *Sensitivity Analyses of the Primary Outcome*

23  
24 We will assess the robustness of the findings of the primary analysis in a number of  
25 sensitivity analyses. First, because operators may choose to deviate from the assigned  
26 laryngoscope for the safety of the patient, we will repeat the primary analysis, but will consider  
27 patients for whom the operator crossed over on the first attempt from the assigned  
28 laryngoscope type to the non-assigned laryngoscope type not to have experienced successful  
29 intubation on the first attempt. Second, we will repeat the primary analysis among only patients  
30 for whom data on the primary outcome from the independent observer is available (i.e.,  
31 excluding cases in which operator self-report was the sole source of information for the primary  
32 outcome). Third, because the operator's prior experience with each type of laryngoscope may  
33 affect the likelihood of success with a video laryngoscope compared with a direct laryngoscope,  
34 we will repeat the primary analysis among only cases in which the proportion of prior intubations  
35 the operator has performed using a direct laryngoscope is between 0.25 and 0.75.  
36  
37  
38  
39  
40  
41  
42  
43  
44  
45  
46  
47  
48  
49  
50

### 51 *Analysis of the Secondary Outcome*

52  
53 For the secondary outcome, severe complications occurring between induction and 2  
54 minutes following intubation, we will perform an unadjusted, intention-to-treat comparison of  
55  
56  
57  
58  
59

1  
2  
3 patients randomized to the video laryngoscope group versus patients randomized to the direct  
4 laryngoscope group, using a chi-square test.  
5  
6  
7

### 8 9 *Analyses of Exploratory Outcomes*

10  
11 For all pre-specified exploratory outcomes, we will conduct unadjusted, intention-to-treat  
12 analyses comparing patients randomized to the video laryngoscope group versus patients  
13 randomized to the direct laryngoscope group. We will calculate absolute risk differences or  
14 differences in medians between groups with the associated 95% confidence intervals.  
15  
16  
17  
18  
19  
20  
21

### 22 *Handling of Missing Data*

23  
24 We anticipate that no data on the primary outcome will be missing. When data are  
25 missing for the secondary or exploratory outcomes, we will perform complete-case analysis,  
26 excluding cases where the data for the analyzed outcome are missing. There will be no  
27 imputation of missing data for these outcomes. In adjusted analyses, missing data for covariates  
28 will be imputed using multiple imputations.  
29  
30  
31  
32  
33  
34  
35  
36

### 37 *Trial status*

38  
39 The DirEct Versus VIdeo LaryngosCope (DEVICE) trial is a prospective, multi-center,  
40 non-blinded randomized clinical trial comparing use of a video laryngoscope to use of a direct  
41 laryngoscope for the first attempt at tracheal intubation of critically ill adults in the ED and ICU.  
42  
43 Patient enrollment began on 16 March 2022 and is being conducted in 6 EDs and 10 ICUs in  
44  
45  
46  
47  
48  
49  
50  
51  
52  
53  
54  
55  
56  
57  
58  
59  
60

## Ethics and Dissemination

### *Waiver of Informed Consent*

Critically ill patients undergoing tracheal intubation in the ED or ICU are at significant risk for morbidity and mortality from their underlying illness. Most patients undergoing tracheal intubation in routine clinical care are intubated using either a video laryngoscope or a direct laryngoscope on the first attempt. Any benefits or risks of these two approaches are experienced by patients undergoing tracheal intubation in clinical care, outside the context of research. As a requirement for enrollment in the DEVICE trial, the patient's treating clinician must believe that either a video laryngoscope or a direct laryngoscope would be a safe and reasonable approach for the patient (otherwise the patient is excluded). Therefore, making the decision between the two approaches randomly (by study group assignment) rather than by a clinician who thinks either approach is safe and reasonable for the patient is expected to pose no more than minimal additional risk.

Obtaining informed consent for participation in the study would be impracticable. The majority of patients undergoing emergency tracheal intubation lack decisional capacity due to their underlying critical illness and surrogate decision makers are frequently absent. Further, emergency tracheal intubation is a time-sensitive procedure with only minutes between the decision to perform intubation and the completion of the procedure. Meaningful informed consent could not be executed in this brief window and attempting to obtain informed consent would lead to potentially deleterious and unethical delays in intubation which would increase the risk of hypoxemia, hypotension, and periprocedural cardiac arrest.

Because the study involves minimal incremental risk, the study would not adversely affect the welfare or privacy rights of the participant, and obtaining informed consent would be impracticable, a waiver of informed consent was requested from and approved by the single institutional review board at Vanderbilt University Medical Center (reference number 211272). This is consistent with previous randomized trials comparing alternative approaches to tracheal

1  
2  
3 intubation commonly used in clinical care.<sup>28,38,39,45–50</sup> This approach was approved by the United  
4 States Department of Defense (DoD) Defense Health Agency Human Research Protection  
5 Office (EIRB# 944893). Institutional review boards at participating sites reviewed the protocol,  
6  
7 addressed any local contextual factors with the site principal investigator, and ceded  
8  
9 responsibility for ethics approval and study oversight to the single IRB.  
10  
11  
12  
13  
14  
15

### 16 *Information for Patients and Families*

17  
18 Information regarding the study is made available to patients and families using a patient  
19 and family information sheet. The patient and family information sheet contains information on  
20 the purpose of the trial, study procedures, risks and discomforts, benefits, use of protected  
21 health information, confidentiality, and investigator contact information. The Defense Health  
22 Agency Human Research Protection Office determined that this procedure meets the  
23 requirements of 32 CFR 219 and DODI 3216.02\_AFI40-402. At centers with a significant  
24 population of non-English speaking patients, the patient and family information sheet has been  
25 translated into Spanish and Somali languages and is made available to those patients.  
26  
27  
28  
29  
30  
31  
32  
33  
34  
35  
36

### 37 *Protocol Changes*

38  
39 Any further amendments to the protocol will be recorded on ClinicalTrials.gov as per  
40 SPIRIT guidelines. See the supplementary file, section 7, for details on how protocol changes  
41 will be handled.  
42  
43  
44  
45  
46

### 47 *Dissemination Plan*

48  
49 Trial results will be submitted to a peer-reviewed journal and will be presented at one or  
50 more scientific conferences.  
51  
52  
53  
54  
55  
56  
57  
58  
59  
60

### Authors' Contributions

Study concept and design: MEP, BED, SAT, SGS, BJL, DRJ, WHS, TWR, AAG, JDC, MWS.

Acquisition of data: MEP, BED, SAT, DRA, KPS, DWR, SG, JPG, KWG, AJL, MRW, SAG, DJV,

JPW, SJH, ISD, CRB, VK, JJB, BDL, SWR, JAP, SHM, DBP, HDW, AE, CGH, AJ, JTH, AAG,

JDC, MWS. Drafting of the manuscript and study supervision: MEP, BED, SAT, JDC, MWS.

Approved the final version of this manuscript and critical revision of the manuscript for important

intellectual content: MEP, BED, SAT, DRA, KPS, DWR, SG, JPG, KWG, AJL, MRW, SAG, DJV,

JPW, SJH, ISD, CRB, VK, JJB, BDL, SWR, JAP, SHM, DBP, HDW, AE, CGH, AJ, JTH, SGS,

BJL, BI, LW, JPR, KNW, DRJ, WHS, TWR, AAG, JDC, MWS.

### Competing Interests

Matthew W. Semler was supported by the National Heart Lung and Blood Institute

(K23HL143053). Jonathan D. Casey was supported by the National Heart Lung and Blood

Institute (K23HL153584-01). John P. Gaillard received support from the CHEST Foundation for

instruction and travel. Todd W. Rice was supported in part by the National Institutes of Health

and received consulting payments from Cumberland Pharmaceuticals, Inc. and Cytovale, Inc.,

and served on a data safety and monitoring board for Sanofi, Inc. All other authors have no

competing interests.

### Funding

The research was funded in part by the United States Department of Defense, Defense Health

Agency, J9 Office, RESTORAL program. Data collection utilized the Research Electronic Data

Capture (REDCap) tool developed and maintained with Vanderbilt Institute for Clinical and

Translational Research grant support (UL1 TR000445 from NCATS/NIH). The funding

institutions had no role in (1) conception, design, or conduct of the study, (2) collection,

management, analysis, interpretation, or presentation of the data, or (3) preparation, review, or

1  
2  
3 approval of the manuscript. The views expressed are those of the authors and do not reflect the  
4  
5 official views or policy of the Department of Defense or its components.  
6  
7  
8  
9  
10  
11  
12  
13  
14  
15  
16  
17  
18  
19  
20  
21  
22  
23  
24  
25  
26  
27  
28  
29  
30  
31  
32  
33  
34  
35  
36  
37  
38  
39  
40  
41  
42  
43  
44  
45  
46  
47  
48  
49  
50  
51  
52  
53  
54  
55  
56  
57  
58  
59  
60

For peer review only



## References

1. Sakles JC, Chiu S, Mosier J, Walker C, Stolz U. The importance of first pass success when performing orotracheal intubation in the emergency department. *Acad Emerg Med* 2013;20(1):71–8.
2. Russotto V, Myatra SN, Laffey JG, et al. Intubation Practices and Adverse Peri-intubation Events in Critically Ill Patients From 29 Countries. *JAMA* 2021;325(12):1164–72.
3. Janeway HH. Intra-tracheal anesthesia from the standpoint of the nose, throat and oral surgeon with a description of a new instrument for catheterizing the trachea. *Laryngoscope* 1913;23(11):1082.
4. Miller RA. A NEW LARYNGOSCOPE. *Anesthesiology* 1941;2(3):317–20.
5. Macintosh RR. A NEW LARYNGOSCOPE. *Lancet* 1943;241(6233):205.
6. Kaplan MB, Ward DS, Berci G. A new video laryngoscope—an aid to intubation and teaching. *J Clin Anesth* 2002;14(8):620–6.
7. Cooper RM, Pacey JA, Bishop MJ, McCluskey SA. Early clinical experience with a new videolaryngoscope (GlideScope) in 728 patients. *Can J Anaesth* 2005;52(2):191–8.
8. Berkow LC, Morey TE, Urdaneta F. The Technology of Video Laryngoscopy. *Anesth Analg* 2018;126(5):1527–34.
9. Hansel J, Rogers AM, Lewis SR, Cook TM, Smith AF. Videolaryngoscopy versus direct laryngoscopy for adults undergoing tracheal intubation. *Cochrane Database Syst Rev* 2022;4:CD011136.
10. Cook TM, Woodall N, Harper J, Benger J, Fourth National Audit Project. Major complications of airway management in the UK: results of the Fourth National Audit Project of the Royal College of Anaesthetists and the Difficult Airway Society. Part 2: intensive care and emergency departments. *Br J Anaesth* 2011;106(5):632–42.
11. Karamchandani K, Wheelwright J, Yang AL, Westphal ND, Khanna AK, Myatra SN. Emergency Airway Management Outside the Operating Room: Current Evidence and Management Strategies. *Anesth Analg* 2021;133(3):648–62.
12. Monette DL, Brown CA 3rd, Benoit JL, et al. The Impact of Video Laryngoscopy on the Clinical Learning Environment of Emergency Medicine Residents: A Report of 14,313 Intubations. *AEM Educ Train* 2019;3(2):156–62.
13. Trimmel H, Kreutziger J, Fertsak G, Fitzka R, Dittrich M, Voelckel WG. Use of the Airtraq laryngoscope for emergency intubation in the prehospital setting: a randomized control trial. *Crit Care Med* 2011;39(3):489–93.
14. Arima T, Nagata O, Miura T, et al. Comparative analysis of airway scope and Macintosh laryngoscope for intubation primarily for cardiac arrest in prehospital setting. *Am J Emerg Med* 2014;32(1):40–3.
15. Trimmel H, Kreutziger J, Fitzka R, et al. Use of the GlideScope Ranger Video

- 1  
2  
3 Laryngoscope for Emergency Intubation in the Prehospital Setting: A Randomized Control  
4 Trial. *Crit Care Med* 2016;44(7):e470–6.  
5
- 6 16. Ducharme S, Kramer B, Gelbart D, Colleran C, Risavi B, Carlson JN. A pilot, prospective,  
7 randomized trial of video versus direct laryngoscopy for paramedic endotracheal intubation  
8 [Internet]. *Resuscitation*. 2017;114:121–6. Available from:  
9 <http://dx.doi.org/10.1016/j.resuscitation.2017.03.022>  
10
- 11 17. Kreutziger J, Hornung S, Harrer C, et al. Comparing the McGrath Mac Video Laryngoscope  
12 and Direct Laryngoscopy for Prehospital Emergency Intubation in Air Rescue Patients: A  
13 Multicenter, Randomized, Controlled Trial. *Crit Care Med* 2019;47(10):1362–70.  
14
- 15 18. Macke C, Gralla F, Winkelmann M, et al. Increased First Pass Success with C-MAC  
16 Videolaryngoscopy in Prehospital Endotracheal Intubation-A Randomized Controlled Trial.  
17 *J Clin Med Res [Internet]* 2020;9(9). Available from: <http://dx.doi.org/10.3390/jcm9092719>  
18
- 19 19. Yeatts DJ, Dutton RP, Hu PF, et al. Effect of video laryngoscopy on trauma patient survival:  
20 a randomized controlled trial. *J Trauma Acute Care Surg* 2013;75(2):212–9.  
21
- 22 20. Ahmadi K, Ebrahimi M, Hashemian AM, Sarshar S, Rahimi-Movaghar V. GlideScope Video  
23 Laryngoscope for Difficult Intubation in Emergency Patients: a Quasi-Randomized  
24 Controlled Trial. *Acta Med Iran* 2015;53(12):738–42.  
25
- 26 21. Driver BE, Prekker ME, Moore JC, Schick AL, Reardon RF, Miner JR. Direct Versus Video  
27 Laryngoscopy Using the C-MAC for Tracheal Intubation in the Emergency Department, a  
28 Randomized Controlled Trial. *Acad Emerg Med* 2016;23(4):433–9.  
29
- 30 22. Goksu E, Kilic T, Yildiz G, Unal A, Kartal M. Comparison of the C-MAC video laryngoscope  
31 to the Macintosh laryngoscope for intubation of blunt trauma patients in the ED. *Turk J*  
32 *Emerg Med* 2016;16(2):53–6.  
33
- 34 23. Kim JW, Park SO, Lee KR, et al. Video laryngoscopy vs. direct laryngoscopy: Which should  
35 be chosen for endotracheal intubation during cardiopulmonary resuscitation? A prospective  
36 randomized controlled study of experienced intubators. *Resuscitation* 2016;105:196–202.  
37
- 38 24. Sulser S, Ubmann D, Schlaepfer M, et al. C-MAC videolaryngoscope compared with direct  
39 laryngoscopy for rapid sequence intubation in an emergency department: A randomised  
40 clinical trial. *Eur J Anaesthesiol* 2016;33(12):943–8.  
41
- 42 25. Sanguanwit P, Yuksen C, Laowattana N. Direct Versus Video Laryngoscopy in Emergency  
43 Intubation: A Randomized Control Trial Study. *Bull Emerg Trauma* 2021;9(3):118–24.  
44
- 45 26. Griesdale DEG, Chau A, Isac G, et al. Video-laryngoscopy versus direct laryngoscopy in  
46 critically ill patients: a pilot randomized trial. *Can J Anaesth* 2012;59(11):1032–9.  
47
- 48 27. Silverberg MJ, Li N, Acquah SO, Kory PD. Comparison of video laryngoscopy versus direct  
49 laryngoscopy during urgent endotracheal intubation: a randomized controlled trial. *Crit Care*  
50 *Med* 2015;43(3):636–41.  
51
- 52 28. Janz DR, Semler MW, Lentz RJ, et al. Randomized Trial of Video Laryngoscopy for  
53 Endotracheal Intubation of Critically Ill Adults. *Crit Care Med* 2016;44(11):1980–7.  
54
- 55 29. Abdelgalel EF, Mowafy SMS. Comparison between Glidescope, Airtraq and Macintosh  
56  
57  
58  
59

- 1  
2  
3 laryngoscopy for emergency endotracheal intubation in intensive care unit: Randomized  
4 controlled trial. *Egyptian Journal of Anaesthesia* 2018;34(4):123–8.  
5
- 6 30. Gao Y-X, Song Y-B, Gu Z-J, et al. Video versus direct laryngoscopy on successful first-  
7 pass endotracheal intubation in ICU patients. *World J Emerg Med* 2018;9(2):99–104.  
8
- 9 31. Dey S, Pradhan D, Saikia P, Bhattacharyya P, Khandelwal H, Adarsha KN. Intubation in the  
10 Intensive Care Unit: C-MAC video laryngoscope versus Macintosh laryngoscope. *Med*  
11 *Intensiva* 2020;44(3):135–41.  
12
- 13 32. Dharanindra. A comparative study of King Vision video laryngoscope and Macintosh  
14 laryngoscope for intubation in the ICU. *Indian J Crit Care Med* 2020;24 Suppl (2):S38–9.  
15
- 16 33. Lascarrou JB, Boisrame-Helms J, Bailly A, et al. Video Laryngoscopy vs Direct  
17 Laryngoscopy on Successful First-Pass Orotracheal Intubation Among ICU Patients: A  
18 Randomized Clinical Trial. *JAMA* 2017;317(5):483–93.  
19
- 20 34. Chan A-W, Tetzlaff JM, Gøtzsche PC, et al. SPIRIT 2013 explanation and elaboration:  
21 guidance for protocols of clinical trials. *BMJ* 2013;346:e7586.  
22
- 23 35. Cormack RS, Lehane J. Difficult tracheal intubation in obstetrics. *Anaesthesia*  
24 1984;39(11):1105–11.  
25
- 26 36. Knaus WA, Draper EA, Wagner DP, Zimmerman JE. APACHE II: a severity of disease  
27 classification system. *Crit Care Med* 1985;13(10):818–29.  
28
- 29 37. Teasdale G, Jennett B. Assessment of coma and impaired consciousness. A practical  
30 scale. *Lancet* 1974;2(7872):81–4.  
31
- 32 38. Driver BE, Prekker ME, Klein LR, et al. Effect of Use of a Bougie vs Endotracheal Tube and  
33 Stylet on First-Attempt Intubation Success Among Patients With Difficult Airways  
34 Undergoing Emergency Intubation: A Randomized Clinical Trial. *JAMA* 2018;319(21):2179–  
35 89.  
36
- 37 39. Driver BE, Semler MW, Self WH, et al. Effect of Use of a Bougie vs Endotracheal Tube  
38 With Stylet on Successful Intubation on the First Attempt Among Critically Ill Patients  
39 Undergoing Tracheal Intubation: A Randomized Clinical Trial. *JAMA* 2021;326(24):2488–  
40 97.  
41
- 42 40. RStudio Team. RStudio: Integrated Development for R [Internet]. 2015;Available from:  
43 <http://www.rstudio.com>  
44
- 45 41. E9 Statistical Principles for Clinical Trials [Internet]. Food and Drug Administration. [cited  
46 2021 Jun 9];Available from: <https://www.fda.gov/media/71336/download>  
47
- 48 42. Statistical Principles for Clinical Trials [Internet]. European Medicines Agency. [cited 2021  
49 Jun 9];Available from: [https://www.ema.europa.eu/en/documents/scientific-guideline/ich-e-9-statistical-principles-clinical-trials-step-5\\_en.pdf](https://www.ema.europa.eu/en/documents/scientific-guideline/ich-e-9-statistical-principles-clinical-trials-step-5_en.pdf)  
50
- 51 43. Recommendations for the Conduct, Reporting, Editing, and Publication of Scholarly Work in  
52 Medical Journals [Internet]. International Committee of Medical Journal Editors. [cited 2021  
53 Jun 9];Available from: <http://www.icmje.org/icmje-recommendations.pdf>  
54  
55  
56  
57  
58  
59

- 1
- 2
- 3
- 4 44. Schandelmaier S, Briel M, Varadhan R, et al. Development of the Instrument to assess the
- 5 Credibility of Effect Modification Analyses (ICEMAN) in randomized controlled trials and
- 6 meta-analyses. *CMAJ* 2020;192(32):E901–6.
- 7
- 8 45. Janz DR, Semler MW, Joffe AM, et al. A Multicenter Randomized Trial of a Checklist for
- 9 Endotracheal Intubation of Critically Ill Adults. *Chest* 2018;153(4):816–24.
- 10
- 11 46. Semler MW, Janz DR, Lentz RJ, et al. Randomized Trial of Apneic Oxygenation during
- 12 Endotracheal Intubation of the Critically Ill. *Am J Respir Crit Care Med* 2016;193(3):273–80.
- 13
- 14 47. Casey JD, Janz DR, Russell DW, et al. Bag-Mask Ventilation during Tracheal Intubation of
- 15 Critically Ill Adults. *N Engl J Med* 2019;380(9):811–21.
- 16
- 17 48. Janz DR, Casey JD, Semler MW, et al. Effect of a fluid bolus on cardiovascular collapse
- 18 among critically ill adults undergoing tracheal intubation (PrePARE): a randomised
- 19 controlled trial. *Lancet Respir Med* 2019;7(12):1039–47.
- 20
- 21 49. Semler MW, Janz DR, Russell DW, et al. A Multicenter, Randomized Trial of Ramped
- 22 Position vs Sniffing Position During Endotracheal Intubation of Critically Ill Adults. *Chest*
- 23 2017;152(4):712–22.
- 24
- 25 50. Russell DW, Casey JD, Gibbs KW, et al. Effect of Fluid Bolus Administration on
- 26 Cardiovascular Collapse Among Critically Ill Patients Undergoing Tracheal Intubation: A
- 27 Randomized Clinical Trial. *JAMA* 2022;328(3):270–9.
- 28
- 29
- 30
- 31
- 32
- 33
- 34
- 35
- 36
- 37
- 38
- 39
- 40
- 41
- 42
- 43
- 44
- 45
- 46
- 47
- 48
- 49
- 50
- 51
- 52
- 53
- 54
- 55
- 56
- 57
- 58
- 59
- 60

1  
2  
3 **Figure Legend**  
4

5 **Figure 1.** Schedule of enrollment, interventions, and assessments in the DEVICE trial. TI,  
6 tracheal intubation.  
7  
8  
9

10  
11  
12  
13  
14  
15  
16  
17  
18  
19  
20  
21  
22  
23  
24  
25  
26  
27  
28  
29  
30  
31  
32  
33  
34  
35  
36  
37  
38  
39  
40  
41  
42  
43  
44  
45  
46  
47  
48  
49  
50  
51  
52  
53  
54  
55  
56  
57  
58  
59  
60

For peer review only

|                                 | STUDY PERIOD           |                      |                 |    |                  |                   |                                       |
|---------------------------------|------------------------|----------------------|-----------------|----|------------------|-------------------|---------------------------------------|
|                                 | Eligibility Screen     | Randomize & Allocate | Peri-Procedural |    |                  |                   | Final Outcome Assessment              |
| TIMEPOINT                       | Decision to perform TI | Prior to TI          | Induction       | TI | 0-2 min after TI | 0-48 hrs after TI | Discharge or 28 days after enrollment |
| <b>ENROLLMENT:</b>              |                        |                      |                 |    |                  |                   |                                       |
| Eligibility Screen              | X                      |                      |                 |    |                  |                   |                                       |
| Allocation                      |                        | X                    |                 |    |                  |                   |                                       |
| <b>INTERVENTIONS:</b>           |                        |                      |                 |    |                  |                   |                                       |
| Video Laryngoscope              |                        |                      |                 | X  |                  |                   |                                       |
| Direct Laryngoscope             |                        |                      |                 | X  |                  |                   |                                       |
| Screening for Contraindications | X                      | X                    | X               | X  |                  |                   |                                       |
| <b>ASSESSMENTS:</b>             |                        |                      |                 |    |                  |                   |                                       |
| Baseline Variables              | X                      | X                    |                 |    |                  |                   |                                       |
| Peri-Procedural Variables       |                        | X                    | X               | X  | X                |                   |                                       |
| Clinical Outcomes               |                        |                      |                 |    |                  | X                 | X                                     |

1  
2  
3 **Supplementary file to:**  
4  
5  
6

7 **DirEct Versus Video LaryngosCope (DEVICE): Protocol and statistical analysis plan for a**  
8 **randomized clinical trial**  
9  
10

11  
12  
13  
14  
15  
16 Table of Contents  
17

- 18 1. SPIRIT 2013 Checklist  
19  
20 2. List of DEVICE Investigators  
21  
22 3. Definition of ICU-Free Days (ICU-FDs)  
23  
24 4. Definition of Ventilator-Free Days (VFDs)  
25  
26 5. Safety Monitoring and Adverse Events  
27  
28 5.1. Adverse Event Definitions  
29  
30 5.2. Monitoring for Adverse Events  
31  
32 5.3. Recording and Reporting Adverse Events  
33  
34 5.4. Clinical Outcomes that may be Exempt from Adverse Event Recording and  
35 Reporting  
36  
37 5.5. Unanticipated Problems involving Risks to Subjects or Others  
38  
39  
40  
41 6. Patient Privacy and Data Storage  
42  
43 7. Plan for Communication of Protocol Changes  
44  
45  
46  
47  
48  
49  
50  
51  
52  
53  
54  
55  
56  
57  
58  
59  
60

## 1. SPIRIT 2013 Checklist

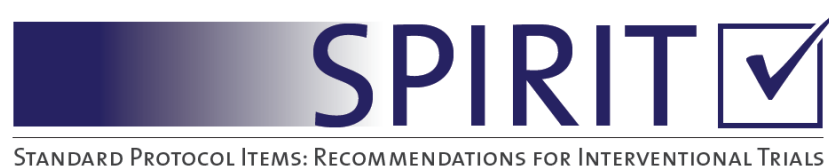

SPIRIT 2013 Checklist: Recommended items to address in a clinical trial protocol and related documents\*

| Section/item                      | Item No | Description                                                                                                                                                                                                                                                                              | Addressed on page number        |
|-----------------------------------|---------|------------------------------------------------------------------------------------------------------------------------------------------------------------------------------------------------------------------------------------------------------------------------------------------|---------------------------------|
| <b>Administrative information</b> |         |                                                                                                                                                                                                                                                                                          |                                 |
| Title                             | 1       | Descriptive title identifying the study design, population, interventions, and, if applicable, trial acronym                                                                                                                                                                             | ___1___                         |
| Trial registration                | 2a      | Trial identifier and registry name. If not yet registered, name of intended registry                                                                                                                                                                                                     | ___6___                         |
|                                   | 2b      | All items from the World Health Organization Trial Registration Data Set                                                                                                                                                                                                                 | ___n/a___                       |
| Protocol version                  | 3       | Date and version identifier                                                                                                                                                                                                                                                              | ___n/a___                       |
| Funding                           | 4       | Sources and types of financial, material, and other support                                                                                                                                                                                                                              | ___29___                        |
| Roles and responsibilities        | 5a      | Names, affiliations, and roles of protocol contributors                                                                                                                                                                                                                                  | ___1-2, Supplement section 2___ |
|                                   | 5b      | Name and contact information for the trial sponsor                                                                                                                                                                                                                                       | ___29___                        |
|                                   | 5c      | Role of study sponsor and funders, if any, in study design; collection, management, analysis, and interpretation of data; writing of the report; and the decision to submit the report for publication, including whether they will have ultimate authority over any of these activities | ___29___                        |
|                                   | 5d      | Composition, roles, and responsibilities of the coordinating centre, steering committee, endpoint adjudication committee, data management team, and other individuals or groups overseeing the trial, if applicable (see Item 21a for data monitoring committee)                         | ___11, 18, 29___                |
| <b>Introduction</b>               |         |                                                                                                                                                                                                                                                                                          |                                 |



|    |                                                           |     |                                                                                                                                                                                                                                                                                                                                                                                |
|----|-----------------------------------------------------------|-----|--------------------------------------------------------------------------------------------------------------------------------------------------------------------------------------------------------------------------------------------------------------------------------------------------------------------------------------------------------------------------------|
| 1  |                                                           |     |                                                                                                                                                                                                                                                                                                                                                                                |
| 2  |                                                           |     |                                                                                                                                                                                                                                                                                                                                                                                |
| 3  |                                                           |     |                                                                                                                                                                                                                                                                                                                                                                                |
| 4  | Background and rationale                                  | 6a  | Description of research question and justification for undertaking the trial, including summary of relevant studies (published and unpublished) examining benefits and harms for each intervention                                                                                                                                                                             |
| 5  |                                                           |     | _____ 8-10 _____                                                                                                                                                                                                                                                                                                                                                               |
| 6  |                                                           |     |                                                                                                                                                                                                                                                                                                                                                                                |
| 7  |                                                           |     |                                                                                                                                                                                                                                                                                                                                                                                |
| 8  |                                                           | 6b  | Explanation for choice of comparators                                                                                                                                                                                                                                                                                                                                          |
| 9  |                                                           |     | _____ 8 _____                                                                                                                                                                                                                                                                                                                                                                  |
| 10 | Objectives                                                | 7   | Specific objectives or hypotheses                                                                                                                                                                                                                                                                                                                                              |
| 11 |                                                           |     | _____ 10 _____                                                                                                                                                                                                                                                                                                                                                                 |
| 12 | Trial design                                              | 8   | Description of trial design including type of trial (eg, parallel group, crossover, factorial, single group), allocation ratio, and framework (eg, superiority, equivalence, noninferiority, exploratory)                                                                                                                                                                      |
| 13 |                                                           |     | _____ 11 _____                                                                                                                                                                                                                                                                                                                                                                 |
| 14 |                                                           |     |                                                                                                                                                                                                                                                                                                                                                                                |
| 15 |                                                           |     |                                                                                                                                                                                                                                                                                                                                                                                |
| 16 |                                                           |     |                                                                                                                                                                                                                                                                                                                                                                                |
| 17 |                                                           |     |                                                                                                                                                                                                                                                                                                                                                                                |
| 18 | <b>Methods: Participants, interventions, and outcomes</b> |     |                                                                                                                                                                                                                                                                                                                                                                                |
| 19 |                                                           |     |                                                                                                                                                                                                                                                                                                                                                                                |
| 20 | Study setting                                             | 9   | Description of study settings (eg, community clinic, academic hospital) and list of countries where data will be collected. Reference to where list of study sites can be obtained                                                                                                                                                                                             |
| 21 |                                                           |     | _____ 5, 23 _____                                                                                                                                                                                                                                                                                                                                                              |
| 22 |                                                           |     |                                                                                                                                                                                                                                                                                                                                                                                |
| 23 |                                                           |     |                                                                                                                                                                                                                                                                                                                                                                                |
| 24 |                                                           |     |                                                                                                                                                                                                                                                                                                                                                                                |
| 25 | Eligibility criteria                                      | 10  | Inclusion and exclusion criteria for participants. If applicable, eligibility criteria for study centres and individuals who will perform the interventions (eg, surgeons, psychotherapists)                                                                                                                                                                                   |
| 26 |                                                           |     | _____ 11 _____                                                                                                                                                                                                                                                                                                                                                                 |
| 27 |                                                           |     |                                                                                                                                                                                                                                                                                                                                                                                |
| 28 |                                                           |     |                                                                                                                                                                                                                                                                                                                                                                                |
| 29 | Interventions                                             | 11a | Interventions for each group with sufficient detail to allow replication, including how and when they will be administered                                                                                                                                                                                                                                                     |
| 30 |                                                           |     | _____ 12-13 _____                                                                                                                                                                                                                                                                                                                                                              |
| 31 |                                                           |     |                                                                                                                                                                                                                                                                                                                                                                                |
| 32 |                                                           | 11b | Criteria for discontinuing or modifying allocated interventions for a given trial participant (eg, drug dose change in response to harms, participant request, or improving/worsening disease)                                                                                                                                                                                 |
| 33 |                                                           |     | _____ 13 _____                                                                                                                                                                                                                                                                                                                                                                 |
| 34 |                                                           |     |                                                                                                                                                                                                                                                                                                                                                                                |
| 35 |                                                           |     |                                                                                                                                                                                                                                                                                                                                                                                |
| 36 |                                                           | 11c | Strategies to improve adherence to intervention protocols, and any procedures for monitoring adherence (eg, drug tablet return, laboratory tests)                                                                                                                                                                                                                              |
| 37 |                                                           |     | _____ 13-14 _____                                                                                                                                                                                                                                                                                                                                                              |
| 38 |                                                           |     |                                                                                                                                                                                                                                                                                                                                                                                |
| 39 |                                                           | 11d | Relevant concomitant care and interventions that are permitted or prohibited during the trial                                                                                                                                                                                                                                                                                  |
| 40 |                                                           |     | _____ 13 _____                                                                                                                                                                                                                                                                                                                                                                 |
| 41 |                                                           |     |                                                                                                                                                                                                                                                                                                                                                                                |
| 42 | Outcomes                                                  | 12  | Primary, secondary, and other outcomes, including the specific measurement variable (eg, systolic blood pressure), analysis metric (eg, change from baseline, final value, time to event), method of aggregation (eg, median, proportion), and time point for each outcome. Explanation of the clinical relevance of chosen efficacy and harm outcomes is strongly recommended |
| 43 |                                                           |     | _____ 16-18 _____                                                                                                                                                                                                                                                                                                                                                              |
| 44 |                                                           |     |                                                                                                                                                                                                                                                                                                                                                                                |
| 45 |                                                           |     |                                                                                                                                                                                                                                                                                                                                                                                |
| 46 |                                                           |     |                                                                                                                                                                                                                                                                                                                                                                                |
| 47 |                                                           |     |                                                                                                                                                                                                                                                                                                                                                                                |
| 48 |                                                           |     |                                                                                                                                                                                                                                                                                                                                                                                |
| 49 |                                                           |     |                                                                                                                                                                                                                                                                                                                                                                                |
| 50 |                                                           |     |                                                                                                                                                                                                                                                                                                                                                                                |
| 51 | Participant timeline                                      | 13  | Time schedule of enrolment, interventions (including any run-ins and washouts), assessments, and visits for participants. A schematic diagram is highly recommended (see Figure)                                                                                                                                                                                               |
| 52 |                                                           |     | _____ 30 _____                                                                                                                                                                                                                                                                                                                                                                 |
| 53 |                                                           |     |                                                                                                                                                                                                                                                                                                                                                                                |
| 54 |                                                           |     |                                                                                                                                                                                                                                                                                                                                                                                |
| 55 |                                                           |     |                                                                                                                                                                                                                                                                                                                                                                                |
| 56 |                                                           |     |                                                                                                                                                                                                                                                                                                                                                                                |
| 57 |                                                           |     |                                                                                                                                                                                                                                                                                                                                                                                |
| 58 |                                                           |     |                                                                                                                                                                                                                                                                                                                                                                                |
| 59 |                                                           |     |                                                                                                                                                                                                                                                                                                                                                                                |
| 60 |                                                           |     |                                                                                                                                                                                                                                                                                                                                                                                |

|    |             |    |                                                                                                                                                                                       |
|----|-------------|----|---------------------------------------------------------------------------------------------------------------------------------------------------------------------------------------|
| 1  |             |    |                                                                                                                                                                                       |
| 2  |             |    |                                                                                                                                                                                       |
| 3  | Sample size | 14 | Estimated number of participants needed to achieve study objectives and how it was determined, including clinical and statistical assumptions supporting any sample size calculations |
| 4  |             |    | _____ 18 _____                                                                                                                                                                        |
| 5  |             |    |                                                                                                                                                                                       |
| 6  |             |    |                                                                                                                                                                                       |
| 7  |             |    |                                                                                                                                                                                       |
| 8  | Recruitment | 15 | Strategies for achieving adequate participant enrolment to reach target sample size                                                                                                   |
| 9  |             |    | _____ n/a _____                                                                                                                                                                       |
| 10 |             |    |                                                                                                                                                                                       |

### Methods: Assignment of interventions (for controlled trials)

#### Allocation:

|    |                                  |     |                                                                                                                                                                                                                                                                                                                                                          |
|----|----------------------------------|-----|----------------------------------------------------------------------------------------------------------------------------------------------------------------------------------------------------------------------------------------------------------------------------------------------------------------------------------------------------------|
| 14 |                                  |     |                                                                                                                                                                                                                                                                                                                                                          |
| 15 |                                  |     |                                                                                                                                                                                                                                                                                                                                                          |
| 16 | Sequence generation              | 16a | Method of generating the allocation sequence (eg, computer-generated random numbers), and list of any factors for stratification. To reduce predictability of a random sequence, details of any planned restriction (eg, blocking) should be provided in a separate document that is unavailable to those who enrol participants or assign interventions |
| 17 |                                  |     | _____ 11-12 _____                                                                                                                                                                                                                                                                                                                                        |
| 18 |                                  |     |                                                                                                                                                                                                                                                                                                                                                          |
| 19 |                                  |     |                                                                                                                                                                                                                                                                                                                                                          |
| 20 |                                  |     |                                                                                                                                                                                                                                                                                                                                                          |
| 21 |                                  |     |                                                                                                                                                                                                                                                                                                                                                          |
| 22 |                                  |     |                                                                                                                                                                                                                                                                                                                                                          |
| 23 |                                  |     |                                                                                                                                                                                                                                                                                                                                                          |
| 24 | Allocation concealment mechanism | 16b | Mechanism of implementing the allocation sequence (eg, central telephone; sequentially numbered, opaque, sealed envelopes), describing any steps to conceal the sequence until interventions are assigned                                                                                                                                                |
| 25 |                                  |     | _____ 11-12 _____                                                                                                                                                                                                                                                                                                                                        |
| 26 |                                  |     |                                                                                                                                                                                                                                                                                                                                                          |
| 27 |                                  |     |                                                                                                                                                                                                                                                                                                                                                          |
| 28 |                                  |     |                                                                                                                                                                                                                                                                                                                                                          |
| 29 | Implementation                   | 16c | Who will generate the allocation sequence, who will enrol participants, and who will assign participants to interventions                                                                                                                                                                                                                                |
| 30 |                                  |     | _____ 11-12 _____                                                                                                                                                                                                                                                                                                                                        |
| 31 |                                  |     |                                                                                                                                                                                                                                                                                                                                                          |
| 32 | Blinding (masking)               | 17a | Who will be blinded after assignment to interventions (eg, trial participants, care providers, outcome assessors, data analysts), and how                                                                                                                                                                                                                |
| 33 |                                  |     | _____ 12 _____                                                                                                                                                                                                                                                                                                                                           |
| 34 |                                  |     |                                                                                                                                                                                                                                                                                                                                                          |
| 35 |                                  |     |                                                                                                                                                                                                                                                                                                                                                          |
| 36 |                                  | 17b | If blinded, circumstances under which unblinding is permissible, and procedure for revealing a participant's allocated intervention during the trial                                                                                                                                                                                                     |
| 37 |                                  |     | _____ n/a _____                                                                                                                                                                                                                                                                                                                                          |
| 38 |                                  |     |                                                                                                                                                                                                                                                                                                                                                          |
| 39 |                                  |     |                                                                                                                                                                                                                                                                                                                                                          |

### Methods: Data collection, management, and analysis

|    |                         |     |                                                                                                                                                                                                                                                                                                                                                                                                              |
|----|-------------------------|-----|--------------------------------------------------------------------------------------------------------------------------------------------------------------------------------------------------------------------------------------------------------------------------------------------------------------------------------------------------------------------------------------------------------------|
| 40 |                         |     |                                                                                                                                                                                                                                                                                                                                                                                                              |
| 41 |                         |     |                                                                                                                                                                                                                                                                                                                                                                                                              |
| 42 | Data collection methods | 18a | Plans for assessment and collection of outcome, baseline, and other trial data, including any related processes to promote data quality (eg, duplicate measurements, training of assessors) and a description of study instruments (eg, questionnaires, laboratory tests) along with their reliability and validity, if known. Reference to where data collection forms can be found, if not in the protocol |
| 43 |                         |     | _____ 13-18 _____                                                                                                                                                                                                                                                                                                                                                                                            |
| 44 |                         |     |                                                                                                                                                                                                                                                                                                                                                                                                              |
| 45 |                         |     |                                                                                                                                                                                                                                                                                                                                                                                                              |
| 46 |                         |     |                                                                                                                                                                                                                                                                                                                                                                                                              |
| 47 |                         |     |                                                                                                                                                                                                                                                                                                                                                                                                              |
| 48 |                         |     |                                                                                                                                                                                                                                                                                                                                                                                                              |
| 49 |                         | 18b | Plans to promote participant retention and complete follow-up, including list of any outcome data to be collected for participants who discontinue or deviate from intervention protocols                                                                                                                                                                                                                    |
| 50 |                         |     | _____ 13, 16, 19 _____                                                                                                                                                                                                                                                                                                                                                                                       |
| 51 |                         |     |                                                                                                                                                                                                                                                                                                                                                                                                              |
| 52 |                         |     |                                                                                                                                                                                                                                                                                                                                                                                                              |
| 53 |                         |     |                                                                                                                                                                                                                                                                                                                                                                                                              |
| 54 |                         |     |                                                                                                                                                                                                                                                                                                                                                                                                              |
| 55 |                         |     |                                                                                                                                                                                                                                                                                                                                                                                                              |
| 56 |                         |     |                                                                                                                                                                                                                                                                                                                                                                                                              |
| 57 |                         |     |                                                                                                                                                                                                                                                                                                                                                                                                              |
| 58 |                         |     |                                                                                                                                                                                                                                                                                                                                                                                                              |
| 59 |                         |     |                                                                                                                                                                                                                                                                                                                                                                                                              |

1  
2  
3  
4  
5  
6  
7  
8  
9  
10  
11  
12  
13  
14  
15  
16  
17  
18  
19  
20  
21  
22  
23  
24  
25  
26  
27  
28  
29  
30  
31  
32  
33  
34  
35  
36  
37  
38  
39  
40  
41  
42  
43  
44  
45  
46  
47  
48  
49  
50  
51  
52  
53  
54  
55  
56  
57  
58  
59  
60

|                                 |     |                                                                                                                                                                                                                                                                                                                                       |                          |
|---------------------------------|-----|---------------------------------------------------------------------------------------------------------------------------------------------------------------------------------------------------------------------------------------------------------------------------------------------------------------------------------------|--------------------------|
| Data management                 | 19  | Plans for data entry, coding, security, and storage, including any related processes to promote data quality (eg, double data entry; range checks for data values). Reference to where details of data management procedures can be found, if not in the protocol                                                                     | _____35_____             |
| Statistical methods             | 20a | Statistical methods for analysing primary and secondary outcomes. Reference to where other details of the statistical analysis plan can be found, if not in the protocol                                                                                                                                                              | _____19-22_____          |
|                                 | 20b | Methods for any additional analyses (eg, subgroup and adjusted analyses)                                                                                                                                                                                                                                                              | _____21, 23_____         |
|                                 | 20c | Definition of analysis population relating to protocol non-adherence (eg, as randomised analysis), and any statistical methods to handle missing data (eg, multiple imputation)                                                                                                                                                       | _____23_____             |
| <b>Methods: Monitoring</b>      |     |                                                                                                                                                                                                                                                                                                                                       |                          |
| Data monitoring                 | 21a | Composition of data monitoring committee (DMC); summary of its role and reporting structure; statement of whether it is independent from the sponsor and competing interests; and reference to where further details about its charter can be found, if not in the protocol. Alternatively, an explanation of why a DMC is not needed | _____18_____             |
|                                 | 21b | Description of any interim analyses and stopping guidelines, including who will have access to these interim results and make the final decision to terminate the trial                                                                                                                                                               | _____18_____             |
| Harms                           | 22  | Plans for collecting, assessing, reporting, and managing solicited and spontaneously reported adverse events and other unintended effects of trial interventions or trial conduct                                                                                                                                                     | __Supplement section 5__ |
| Auditing                        | 23  | Frequency and procedures for auditing trial conduct, if any, and whether the process will be independent from investigators and the sponsor                                                                                                                                                                                           | _____18-19_____          |
| <b>Ethics and dissemination</b> |     |                                                                                                                                                                                                                                                                                                                                       |                          |
| Research ethics approval        | 24  | Plans for seeking research ethics committee/institutional review board (REC/IRB) approval                                                                                                                                                                                                                                             | _____23-24_____          |
| Protocol amendments             | 25  | Plans for communicating important protocol modifications (eg, changes to eligibility criteria, outcomes, analyses) to relevant parties (eg, investigators, REC/IRBs, trial participants, trial registries, journals, regulators)                                                                                                      | __Supplement section 7__ |
| Consent or assent               | 26a | Who will obtain informed consent or assent from potential trial participants or authorised surrogates, and how (see Item 32)                                                                                                                                                                                                          | _____23-25_____          |

|    |                               |     |                                                                                                                                                                                                                                                                                     |
|----|-------------------------------|-----|-------------------------------------------------------------------------------------------------------------------------------------------------------------------------------------------------------------------------------------------------------------------------------------|
| 1  |                               |     |                                                                                                                                                                                                                                                                                     |
| 2  |                               |     |                                                                                                                                                                                                                                                                                     |
| 3  |                               |     |                                                                                                                                                                                                                                                                                     |
| 4  |                               | 26b | Additional consent provisions for collection and use of participant data and biological specimens in ancillary studies, if applicable                                                                                                                                               |
| 5  |                               |     | ___Supplement section 6_____                                                                                                                                                                                                                                                        |
| 6  |                               |     |                                                                                                                                                                                                                                                                                     |
| 7  | Confidentiality               | 27  | How personal information about potential and enrolled participants will be collected, shared, and maintained in order to protect confidentiality before, during, and after the trial                                                                                                |
| 8  |                               |     | ___Supplement section 6_____                                                                                                                                                                                                                                                        |
| 9  |                               |     |                                                                                                                                                                                                                                                                                     |
| 10 |                               |     |                                                                                                                                                                                                                                                                                     |
| 11 |                               |     |                                                                                                                                                                                                                                                                                     |
| 12 | Declaration of interests      | 28  | Financial and other competing interests for principal investigators for the overall trial and each study site                                                                                                                                                                       |
| 13 |                               |     | ___29_____                                                                                                                                                                                                                                                                          |
| 14 |                               |     |                                                                                                                                                                                                                                                                                     |
| 15 | Access to data                | 29  | Statement of who will have access to the final trial dataset, and disclosure of contractual agreements that limit such access for investigators                                                                                                                                     |
| 16 |                               |     | ___Supplement section 6_____                                                                                                                                                                                                                                                        |
| 17 |                               |     |                                                                                                                                                                                                                                                                                     |
| 18 |                               |     |                                                                                                                                                                                                                                                                                     |
| 19 | Ancillary and post-trial care | 30  | Provisions, if any, for ancillary and post-trial care, and for compensation to those who suffer harm from trial participation                                                                                                                                                       |
| 20 |                               |     | ___n/a_____                                                                                                                                                                                                                                                                         |
| 21 |                               |     |                                                                                                                                                                                                                                                                                     |
| 22 |                               |     |                                                                                                                                                                                                                                                                                     |
| 23 | Dissemination policy          | 31a | Plans for investigators and sponsor to communicate trial results to participants, healthcare professionals, the public, and other relevant groups (eg, via publication, reporting in results databases, or other data sharing arrangements), including any publication restrictions |
| 24 |                               |     | ___10, 25_____                                                                                                                                                                                                                                                                      |
| 25 |                               |     |                                                                                                                                                                                                                                                                                     |
| 26 |                               |     |                                                                                                                                                                                                                                                                                     |
| 27 |                               |     |                                                                                                                                                                                                                                                                                     |
| 28 |                               |     |                                                                                                                                                                                                                                                                                     |
| 29 |                               |     |                                                                                                                                                                                                                                                                                     |
| 30 |                               | 31b | Authorship eligibility guidelines and any intended use of professional writers                                                                                                                                                                                                      |
| 31 |                               |     | ___n/a_____                                                                                                                                                                                                                                                                         |
| 32 |                               |     |                                                                                                                                                                                                                                                                                     |
| 33 |                               | 31c | Plans, if any, for granting public access to the full protocol, participant-level dataset, and statistical code                                                                                                                                                                     |
| 34 |                               |     | ___Supplement section 6_____                                                                                                                                                                                                                                                        |
| 35 |                               |     |                                                                                                                                                                                                                                                                                     |
| 36 |                               |     |                                                                                                                                                                                                                                                                                     |
| 37 | <b>Appendices</b>             |     |                                                                                                                                                                                                                                                                                     |
| 38 | Informed consent materials    | 32  | Model consent form and other related documentation given to participants and authorised surrogates                                                                                                                                                                                  |
| 39 |                               |     | ___n/a_____                                                                                                                                                                                                                                                                         |
| 40 |                               |     |                                                                                                                                                                                                                                                                                     |
| 41 |                               |     |                                                                                                                                                                                                                                                                                     |
| 42 | Biological specimens          | 33  | Plans for collection, laboratory evaluation, and storage of biological specimens for genetic or molecular analysis in the current trial and for future use in ancillary studies, if applicable                                                                                      |
| 43 |                               |     | ___n/a_____                                                                                                                                                                                                                                                                         |
| 44 |                               |     |                                                                                                                                                                                                                                                                                     |
| 45 |                               |     |                                                                                                                                                                                                                                                                                     |
| 46 |                               |     |                                                                                                                                                                                                                                                                                     |

---

\*It is strongly recommended that this checklist be read in conjunction with the SPIRIT 2013 Explanation & Elaboration for important clarification on the items. Amendments to the protocol should be tracked and dated. The SPIRIT checklist is copyrighted by the SPIRIT Group under the Creative Commons [“Attribution-NonCommercial-NoDerivs 3.0 Unported”](https://creativecommons.org/licenses/by-nc-nd/3.0/) license.

## 2. List of DEVICE Investigators

Vanderbilt University Medical Center– Jonathan D. Casey, MD, MSc\*; Matthew W. Semler, MD, MSc\*; Todd W. Rice, MD, MSc\*; Kevin Seitz, MD, MPH\*; Wesley Self, MD, MPH\*; Jeremy P. Walco, MD\*; Christopher Hughes, MD\*; Brant Imhoff, MS\*; Li Wang, MS\*; Jillian P. Rhoads, PhD\*; Kelsey Womack, PhD\*; Bradley D. Lloyd, RRT-ACCS\*; Christopher J. Lindsell, PhD; Colleen M. Ratcliff, BS; Christina Kampe, MA, CCRP; Edward T. Qian, MD; Jacob A. Wood BS; Margaret A. Hays RN, MSN; Liza M. Frawley BSN, RN.

Hennepin County Medical Center– Matthew E. Prekker, MD, MPH\*; Brian E. Driver, MD\*; Sydney J. Hansen, MD\*; Audrey Hendrickson, MPH; Stephen Douglas, BS; Kowsar Hurreh, BS, Leyla Taghizadeh, BA.

University of Colorado School of Medicine– Daniel Resnick-Ault, MD\*; Jill J. Bastman, BSN, RN\*; Adit A. Ginde, MD, MPH\*; Cori Withers, BS.

University of Alabama at Birmingham Medical Center and Heersink School of Medicine– Derek W. Russell, MD\*; Sheetal Gandotra, MD\*; Sarah W. Robison, MD\*; Micah R. Whitson, MD\*; David B. Page, MD, MSPH\*; Anna Altz-Stamm RN, BSN, CCRN; Mary Clay Boone RN, BSN; Robert B. Johnson RRT; Geri-Anne Warman RN, BSN; Jennifer J. Oswald RN, BSN; Jerrod Isbell RRT; Anne Merrill Mason RN, BSN; Gina White RN, BSN; Drew Robinson MD; Jordan Minish MD; Reed Lahaye MD; Edwin Gunn MD; Abdulhakim Tlimat MD; Tyler Greathouse DO; Luis L. Tatem MD; Christopher Richardson MD; Austin Oslock MD; John Patrick Simmons MD; Morgan Locy MD, PhD; Ryan Goetz MD; Daniel Sullivan MD; Ross Schumacher MD; Melissa Jordan MD; Jonathan Kalehoff MD; Anneka Hutton MD; Daniel Kelmenson MD; Meena Sridhar MD; Ahmed Salem MD; Aneesah B. Jaumally MD; Ishan Lalani MD, MPH; William S. Stigler

1  
2  
3 MD; Phillip J. O'Reilly MD; Donna S. Harris RN, BSN; Cara E. Porter RN, ADN; Sonya Hardy,  
4 MA; Puneet Aulakh MD; Joseph B. Barney MD; Joseph Chiles III MD; Bryan Garcia MD; Aditya  
5 Kotecha MD; Takudzwa Mkorombindo MD; Peter Morris MD; Kinner Patel MD; R. Chad Wade  
6 MD; Carla Copeland MD; Michael C. Kurz, MD, MS.  
7  
8  
9  
10  
11  
12

13 Denver Health Medical Center– Stacy A. Trent, MD, MSPH\*; Ivor S. Douglas, MD\*; Carol Lynn  
14 Lyle, PA-C, MPH.  
15  
16  
17  
18  
19

20 Wake Forest School of Medicine– Kevin W. Gibbs, MD\*; Jessica A. Palakshappa, MD\*; John P.  
21 Gaillard, MD\*; Madeline Hicks, BS; Haileigh Henson, RN; Savanna Burgess, RN; Benjamin  
22 Richards, RN; Matthew Strong, RN; Charles Yarbrough, RN; Paul Finkelstein, RN.  
23  
24  
25  
26  
27

28 Ochsner Health– Derek J. Vonderhaar, MD\*; Alyssa Espinera, MD\*.  
29  
30  
31  
32

33 University of Washington Harborview Medical Center– Andrew J. Latimer, MD\*; Steven H.  
34 Mitchell, MD\*; Christopher R. Barnes, MD\*; Aaron Joffe, DO\*; Layla A. Anderson, BS; Thomas  
35 C. Paulsen, BS; Itay Bentov, MD.  
36  
37  
38  
39  
40

41 Baylor. Scott. and White Health, Temple– Shekhar A. Ghamande, MD\*; Heath D. White, DO,  
42 MS\*; Alfredo Vazquez, MD; Juan Sanchez, MD; Conner Moslander, MD; Alejandro C. Arroliga,  
43 MD; Zenia Sattar, MD; Tasnim Lat, DO.  
44  
45  
46  
47  
48

49 Duke University School of Medicine– Vijay Krishnamoorthy, MD, PhD\*; J. Taylor Herbert, MD,  
50 PhD\*.  
51  
52  
53  
54  
55

56 Brooke Army Medical Center– Brit J. Long, MD\*; Steven G. Schauer, DO, MS\*.  
57  
58  
59  
60

1  
2  
3  
4  
5  
6  
7  
8  
9  
10  
11  
12  
13  
14  
15  
16  
17  
18  
19  
20  
21  
22  
23  
24  
25  
26  
27  
28  
29  
30  
31  
32  
33  
34  
35  
36  
37  
38  
39  
40  
41  
42  
43  
44  
45  
46  
47  
48  
49  
50  
51  
52  
53  
54  
55  
56  
57  
58  
59  
60

\* Denotes an author listed on the byline

### 3. Definition of ICU-Free Days (ICU-FDs)

ICU-FDs are defined as the number of days, between enrollment and 28 days after enrollment, in which the patient is alive and not admitted to an intensive care unit service after the patient's final discharge from the intensive care unit. Patients who are never discharged from the intensive care unit receive a value of 0. Patients who die before day 28 receive a value of 0. For patients who return to an ICU and are subsequently discharged prior to day 28, ICU-free days are counted from the date of final ICU discharge. All data are censored hospital discharge or 28 days, whichever comes first.



#### 4. Definition of Ventilator-Free Days (VFDs)

VFDs are defined as the number of days, between enrollment and 28 days after enrollment, during which the patient is alive and with unassisted breathing and remains free of assisted breathing. If a patient returns to assisted breathing and subsequently achieves unassisted breathing prior to day 28, VFD will be counted from the end of the last period of assisted breathing to day 28. If the patient is receiving assisted ventilation at day 28 or dies prior to day 28, VFDs are 0. If a patient is discharged while receiving assisted ventilation, VFDs are 0. All data is censored hospital discharge or 28 days, whichever comes first.

## 5. Safety Monitoring and Adverse Events

Assuring patient safety is an essential component of this protocol. Use of a video laryngoscope and use of a direct laryngoscope are both standard-of-care interventions that have been used in clinical practice for decades with an established safety profile. However, any trial conducted during a high-risk, time-sensitive procedure like tracheal intubation of critically ill patients raises unique safety considerations. This protocol addresses these considerations through:

1. Exclusion criteria designed to prevent enrollment of patients likely to experience adverse events from intubation using a video laryngoscope or intubation using a direct laryngoscope;
2. Systematic collection of outcomes relevant to the safety of intubation using a video laryngoscope or intubation using a direct laryngoscope;
3. Structured monitoring, assessment, recording, and reporting of adverse events.

### 5.1. Adverse Event Definitions

*Adverse Event* – An adverse event will be defined as any untoward or unfavorable medical occurrence in a human subject temporally associated with the subject's participation in the research, whether or not considered related to the subject's participation in the research. Any adverse event occurring during the research will be classified according to the following characteristics:

- *Seriousness* – An adverse event will be considered “serious” if it:
  - Results in death;
  - Is life-threatening (defined as placing the patient at immediate risk of death);
  - Results in inpatient hospitalization or prolongation of existing hospitalization;
  - Results in a persistent or significant disability or incapacity;
  - Results in a congenital anomaly or birth defect; or

- 1  
2  
3           ○ Based upon appropriate medical judgment, may jeopardize the patient's health  
4           and may require medical or surgical intervention to prevent one of the other  
5           outcomes listed in this definition.  
6  
7  
8  
9
- 10 ● *Unexpectedness* – An adverse event will be considered “unexpected” if the nature,  
11 severity, or frequency is neither consistent with:  
12
    - 13           ○ The known or foreseeable risk of adverse events associated with the procedures  
14           involved in the research that are described in the protocol-related documents,  
15           such as the IRB-approved research protocol; nor
    - 16           ○ The expected natural progression of any underlying disease, disorder, or  
17           condition of the subject experiencing the adverse event and the subject's  
18           predisposing risk factor profile for the adverse event.
  - 19 ● *Relatedness* – The strength of the relationship of an adverse event to a study  
20 intervention or study procedure will be defined as follows:  
21
    - 22           ○ Definitely Related: The adverse event follows (1) a reasonable, temporal  
23           sequence from a study procedure AND (2) cannot be explained by the known  
24           characteristics of the patient's clinical state or other therapies AND (3) evaluation  
25           of the patient's clinical state indicates to the investigator that the experience is  
26           definitely related to study procedures.
    - 27           ○ Probably or Possibly Related: The adverse event meets some but not all of the  
28           above criteria for “Definitely Related”.
    - 29           ○ Probably Not Related: The adverse event occurred while the patient was on the  
30           study but can reasonably be explained by the known characteristics of the  
31           patient's clinical state or other therapies.
    - 32           ○ Definitely Not Related: The adverse event is definitely produced by the patient's  
33           clinical state or by other modes of therapy administered to the patient.
- 34  
35  
36  
37  
38  
39  
40  
41  
42  
43  
44  
45  
46  
47  
48  
49  
50  
51  
52  
53  
54  
55  
56  
57  
58  
59  
60

- Uncertain Relationship: The adverse event does not fit in any of the above categories.

## 5.2. Monitoring for Adverse Events

The time interval during which patients will be monitored for the occurrence of adverse events begins at randomization and ends at the first of hospital discharge or 28 days. Adverse events occurring before randomization or after hospital discharge or 28 days will not be collected. The lead investigator at each enrolling site will have primary responsibility for overseeing the monitoring, assessment, and reporting of adverse events. Site study personnel will evaluate for the occurrence of adverse events by manual review of the electronic health record and by communication with treating clinicians. Site study personnel will evaluate for the occurrence of adverse events by manual review of the electronic health record at two time points. The first will occur as close as feasible to 24 hours after randomization during initial data collection. The second will occur at the first of hospital discharge or 28 days after enrollment during final data collection. Study personnel at each site will also communicate regularly with the treating clinicians who perform tracheal intubation in the study environments between enrollment and 28 days after enrollment to solicit information about any potential adverse events. If study personnel at a site identify a potential adverse event, the lead investigator at the site will be immediately notified. The lead investigator at the site will assess the seriousness, unexpectedness, and relatedness of the potential adverse event. With assistance as needed from the coordinating center and the trial primary investigator, the lead investigator at the site will determine whether the event qualifies for recording and reporting.

## 5.3. Recording and Reporting Adverse Events

The following types of adverse events will be recorded and reported:

- Adverse events that are Serious and Definitely Related, Probably or Possibly Related, or of Uncertain Relationship.
- Adverse events that are Unexpected and Definitely Related, Probably or Possibly Related, or of Uncertain Relationship.

Adverse events that do not meet the above criteria will not be recorded or reported. Adverse events that the lead investigator at a site assesses to meet the above criteria for recording and reporting will be entered into the adverse event electronic case report form in the trial database. The lead investigator at the site will record an assessment of each characteristic for the adverse event, including seriousness, unexpectedness, and relatedness. For any adverse event that is **serious AND unexpected**, and definitely related, probably or possibly related, or of uncertain relationship, the lead investigator at the site will report the adverse event to the coordinating center and the trial primary investigators **within 24 hours** of becoming aware of the adverse event. For any other adverse event requiring recording and reporting, the lead investigator at the site will report the adverse event to the coordinating center and the trial primary investigators **within 72 hours** of becoming aware of the adverse event. The coordinating center and the trial principal investigator will coordinate with the lead investigator at the site to obtain information about the adverse event regarding each characteristic for the adverse event, including seriousness, expectedness, and relatedness. The lead investigator at the site will be responsible for making final determinations regarding seriousness and unexpectedness. The coordinating center and trial principal investigator will be responsible for making final determinations regarding relatedness.

For adverse events that meet the above criteria for recording and reporting, the coordinating center will notify the DSMB, the IRB, and the sponsor in accordance with the following reporting plan:

| Characteristics of the Adverse Event                                                                                                                  | Reporting Period                                                                    |
|-------------------------------------------------------------------------------------------------------------------------------------------------------|-------------------------------------------------------------------------------------|
| Fatal or life-threatening (and therefore serious), unexpected, and definitely related, probably or possibility related, or of uncertain relationship. | Report to the DSMB, IRB, and sponsor within 7 days after notification of the event. |
| Serious but non-fatal and non-life-threatening, unexpected, and definitely related, probably or possibly related, or of uncertain relationship.       | Report to DSMB, IRB, and sponsor within 15 days of notification of the event.       |
| All other adverse events meeting criteria for recording and reporting.                                                                                | Report to DSMB in regularly scheduled DSMB safety reports.                          |

#### 5.4. Clinical Outcomes that may be Exempt from Adverse Event Recording and Reporting

In this study of critically ill patients at high risk for death and other adverse outcomes due to their underlying critical illness, clinical outcomes, including death and organ dysfunction, will be systematically collected and analyzed for all patients. The primary, secondary, safety, and exploratory outcomes will be recorded and reported as clinical outcomes and not as adverse events unless treating clinicians or site investigators believe the event is Definitely Related or Probably or Possibly Related to the study intervention or study procedures. This approach – considering death and organ dysfunction as clinical outcomes rather than adverse events and systematically collecting these clinical outcomes for analysis – is common in ICU trials. This approach ensures comprehensive data on death and organ dysfunction for all patients, rather than relying on sporadic adverse event reporting to identify these important events. The following events are examples of study-specific clinical outcomes that would not be recorded

1  
2  
3 and reported as adverse events unless treating clinicians or site investigators believe the event  
4 was Definitely Related or Probably or Possibly Related to the study intervention or study  
5  
6 procedures:

- 7  
8  
9
- 10 ● Death (all deaths occurring prior to hospital discharge or 28 days will be recorded);
  - 11 ● Organ dysfunction
  - 12 ○ Pulmonary – hypoxemia, aspiration, acute hypoxemic respiratory failure,
  - 13 pneumothorax
  - 14 ○ Cardiac – hypotension, shock, vasopressor receipt, cardiac arrest;
  - 15
  - 16 ● Duration of mechanical ventilation;
  - 17
  - 18 ● Duration of ICU admission;
  - 19
  - 20 ● Duration of hospitalization
  - 21
  - 22
  - 23
  - 24
  - 25
  - 26
  - 27
  - 28

29 Note: A study-specific clinical outcome may also qualify as an adverse event meeting criteria for  
30 recording and reporting. For example, an injury to the teeth that the investigator considers  
31 Definitely Related to randomization to use of a direct laryngoscope would be both recorded as a  
32 study-specific clinical outcome and recorded and reported as a Serious and Definitely Related  
33 adverse event.  
34  
35  
36  
37  
38  
39  
40  
41

## 42 **5.5. Unanticipated Problems Involving Risks to Subjects or Others**

43  
44 Investigators must also report Unanticipated Problems Involving Risks to Subjects or Others  
45 (“Unanticipated Problems”), regardless of severity, associated with study procedures within 24  
46 hours of the site investigator becoming aware of the Unanticipated Problem. An Unanticipated  
47 Problem is defined as any incident, experience, or outcome that meets all of the following  
48 criteria:  
49  
50  
51  
52  
53  
54

- Unexpected (in terms of nature, severity, or frequency) given (a) the research procedures that are described in the protocol-related documents, such as the IRB-approved research protocol; and (b) the characteristics of the subject population being studied; AND
- Definitely Related or Probably or Possibly Related to participation in the research (as defined above in the section on characteristics of adverse events); AND
- Suggests that the research places subjects or others at a greater risk of harm (including physical, psychological, economic, or social harm) than was previously known or recognized.

If any study personnel at a site become aware of an event that may represent an Unanticipated problem, they will immediately contact the lead investigator for the site. The lead investigator at the site will assess whether the event represents an Unanticipated Problem by applying the criteria described above. If the lead investigator at the site determines that the event represents an Unanticipated Problem, the lead investigator at the site investigator will record the Unanticipated Problem in the Unanticipated Problem electronic case report form in the trial database. The lead investigator at the site will then communicate that an Unanticipated Problem has occurred to the coordinating center and the trial principal investigator within 24 hours of the lead investigator at the site becoming aware of the Unanticipated Problem. The coordinating center and principal investigator will coordinate with the lead investigator at the site to obtain information about the Unanticipated Problem. The coordinating center will report the Unanticipated Problem to the DSMB, IRB, and sponsor within 15 days of becoming aware of the Unanticipated Problem.



## 6. Patient Privacy and Data Storage

At no time during this study, its analysis, or its publication, will patient identities be revealed in any manner. The minimum necessary data containing patient or provider identities or other private healthcare information (PHI), is collected. All subjects are assigned a unique study ID number for tracking purposes. Data collected from the medical record is entered into the secure online database REDCap. The PHI required to accurately collect clinical and outcomes data is available only to investigators at the site at which the subject is enrolled, and this data is shared only in completely de-identified form with the coordinating center via the secure online database REDCap. Hard copies of the data collection sheet completed at the time of the airway management event are stored in a locked room until after the completion of enrollment and data cleaning. Once data are verified and the database is locked, all hard copies of data collection forms will be destroyed. The de-identified dataset housed in REDCap will be accessed by the coordinating center for reporting the results of this trial. All data will be maintained in the secure online database REDCap until the time of study publication. At the time of publication, all PHI at local centers will be expunged and only the de-identified version of the database will be retained. Potential future use of de-identified data generated in the course of this study by the coordinating center and other participating sites is allowed and will be governed by mutual data sharing use agreements.

## 7. Plan for Communication of Protocol Changes

Any changes to the trial protocol (e.g., changes to eligibility criteria, outcomes, analyses) will be implemented via a new version of the full trial protocol, tracked with the date of the update and the version number of the trial protocol. A list summarizing the changes made with each protocol revision will be included at the end of each protocol. The updated protocol will be sent to the relevant IRBs for tracking prior to implementation of the protocol change. At the time of publication, the original trial protocol, and the final trial protocol, including the summary of changes made with each protocol change, will be included in the supplementary material for publication.
